# Supplementary material for: Microcontaminants and microplastics in water from the textile sector: a review and a database of physicochemical properties, use in the textile process, and ecotoxicity data for detected chemicals
Source: Royal Society of Chemistry journal article supplement (doi:10.1039/d4em00639a), 2025-01-01
Supplement: d4em00639a1.xlsx [file d4em00639a1.xlsx]

## Sheet: Table 1
Class	Chemicals	CAS	ECHA CLASSIFICATION	ECHA Classification	Ref ECHA Classification	CoRAP 22	CoRAP 22	Stockholm Convention 23	Stockholm Convention 23	ZDHC 24	MW (g/mol) 25	Log Kow	Ref Log Kow	pKa	Ref pKa	WS (mg/L)	Ref WS	VP (Pa)	Ref VP	P-T	DP	PP	FP	Country of measurement	Sample type	Ref. for Chemical detected	EC50 ALGA (mg/L)	Ref. EC50 Alga	EC50 DAPHNIA (mg/L)	Ref EC50 Daphnia	LC50 FISH (mg/L)	Ref EC50 Fish	Lowest value selected between EC50 or LC50 (mg/L)	Tested Species	Calculated PNEC (mg/L)
Alcohols	2,2'-oxybis-Ethanol	111-46-6	Not available	NO	1	CoRAP - No need for follow up	YES	-	NO	NO	106.12	-1.47	26	N.A.	N.A.	1000000	26	0.76	26	1	2	3	4	China	Textile WWTPs; River	34			3.7	97	75200	97	3.7	D	0.0037
Alcohols	2-ethyl-1-hexanol	104-76-7	Not available	NO	1	CoRAP - No need for follow up	YES	-	NO	NO	130.23	3.1	25	N.A.	N.A.	880	25	18.1	25		2	3	4	China	Textile WWTPs; River	34					10	97	10	F	0.01
Alcohols	2-isopropoxyethanol/ethanol, 2-(1-methylethoxy)	109-59-1	Not available	NO	1	-	NO	-	NO	NO	104.15	0.05	26	N.A.	N.A.	333000	26	239	26	1				Morocco	Textile effluents	35					> 5000	97	5000	F	5
Alcohols	Benzenemethanol, 4-(1-methylethyl)-	536-60-7	Not available	NO	1	-	NO	-	NO	NO	150.22	2.53	26	N.A.	N.A.	1690	26	0.421	26					Morocco	Textile effluents	35							N.A.
Alcohols	Bis(methylbenzylidene) sorbitol	87826-41-3	Not available	NO	1	-	NO	-	NO	NO	386.4	1.81	25	N.A.	N.A.	1.5	29	N.A.	N.A.	1				China	Textile effluents	36							N.A.
Alcohols	Ethanol	64-17-5	Not available	NO	1	-	NO	-	NO	NO	46.07	-0.31	25	15.9	25	1000000	25	7900	25	1	2	3		Morocco	Textile effluents	35			3715	97	13	97	13	F	0.013
Alcohols	Ethanol,2-[4-(1,1dimethylethyl)phenoxy]	713-46-2	Not available	NO	1	-	NO	-	NO	NO	194.27	3.01	26	N.A.	N.A.	407	26	0.0112	26	N.A.	N.A.	N.A.	N.A.	Morocco	Textile effluents	35							N.A.
Aldehyde-related compounds	Glyceraldehyde diethylacetal	10487-05-5	Not available	NO	1	-	NO	-	NO	NO	164.2	0.05	26	N.A.	N.A.	59400	26	0.102	26	N.A.	N.A.	N.A.	N.A.	Morocco	Textile effluents	35							N.A.
Aldehyde-related compounds	Acetaldehyde, diethyl acetal	105-57-7	Not available	NO	1	-	NO	-	NO	NO	118.17	0.84	26	N.A.	N.A.	19500	26	5250	26		2	3	4	Morocco	Textile effluents	35							N.A.
Aldehyde-related compounds	Acetaldehyde, tetramer	108-62-3	Not available	NO	1	-	NO	-	NO	NO	176.21	0.12	25	N.A.	N.A.	10800	25	6.67	25	1			4	Morocco	Textile effluents	35					7.3	97	7.3	F	0.0073
Aldehyde-related compounds	Benzene, (1,2,2-trimethoxyethyl)-	54845-42-0	Not available	NO	1	-	NO	-	NO	NO	196.24	1.09	26	N.A.	N.A.	5350	26	4.47	26	N.A.	N.A.	N.A.	N.A.	Morocco	Textile effluents	35							N.A.
Aldehyde-related compounds	Benzene, 1-(2,2-dimethoxyethyl)-4-methoxy-	42866-92-2	Not available	NO	1	-	NO	-	NO	NO	196.24	2.01	26	N.A.	N.A.	876	26	2.11	26	N.A.	N.A.	N.A.	N.A.	Morocco	Textile effluents	35							N.A.
Aldehyde-related compounds	Ethane, 2-chloro-1,1-dimethoxy	97-97-2	Not available	NO	1	-	NO	-	NO	NO	124.56	0.7	(Computed by XLogP3 3.0 release 2021.10.14) 25	N.A.	N.A.	N.A.	N.A.	N.A.	N.A.	N.A.	N.A.	N.A.	N.A.	Morocco	Textile effluents	35							N.A.
Aldehyde-related compounds	Methane, trimethoxy- (Trimethyl orthoformate)	149-73-5	Not available	NO	1	-	NO	-	NO	NO	106.12	0.25	26	N.A.	N.A.	68500	26	4880	26	1				Morocco	Textile effluents	35							N.A.
Aldehyde-related compounds	Methoxyacetaldehyde diethyl acetal	4819-75-4	Not available	NO	1	-	NO	-	NO	NO	148.2	0.7	(Computed by XLogP3 3.0 release 2021.10.14) 25	N.A.	N.A.	N.A.	N.A.	N.A.	N.A.	N.A.	N.A.	N.A.	N.A.	Morocco	Textile effluents	35							N.A.
Aldehydes	3,5-di-tert-butyl-4-hydroxybenzaldehyde	1620-98-0	Not available	NO	1	-	NO	-	NO	NO	234.33	4.2	26	N.A.	N.A.	28.4	26	0.000293	26		2	3		China	Textile WWTPs; River	34							N.A.
Aldehydes	Benzaldehyde	100-52-7	Not available	NO	1	CoRAP - No need for follow up	YES	-	NO	NO	106.12	1.48	25	14.9	25	6950	25	169			2	3		China	Textile WWTPs; River	34			9	97	1.07	97	1.07	F	0.00107
Aldehydes	Methylglyoxal	78-98-8	Not available	NO	1	-	NO	-	NO	NO	72.06	-1.5	26	N.A.	N.A.	1000000	26	16100	26	N.A.	N.A.	N.A.	N.A.	Morocco	Textile effluents	35							N.A.
Aldehydes	Pent-2-ynal, 4,4-dimethyl-	2579-21-7	Not available	NO	1	-	NO	-	NO	NO	110.15	1.46	26	N.A.	N.A.	6120	26	573	26	N.A.	N.A.	N.A.	N.A.	Morocco	Textile effluents	35							N.A.
Aliphatic carboxylic acids	Beta-Methyllevulinic Acid/pentanoic acid, 3-methyl-4-oxo	6628-79-1	Not available	NO	1	-	NO	-	NO	NO	130.14	-0.07	26	N.A.	N.A.	263000	26	5.87	26		2			Morocco	Textile effluents	35							N.A.
Alkylphenols (APs) and Alkylphenols ethoxylated (APEOs)	2-phenoxy-ethoxylated fatty alcohol (AGFE)	122-99-6	Not available	NO	1	-	NO	-	NO	NO	138.068	1.16	26	N.A.	N.A.	28200	26	0.598	26	1	2	3	4	Argentina	Textile effluents; Lagoon	37					135	97	135	F	0.135
Alkylphenols (APs) and Alkylphenols ethoxylated (APEOs)	4 Nonylphenoltriethoxylate (NP3EO)	51437-95-7	Annex XVII	YES	2	-	NO	-	NO	YES	352.5	5.03	26	N.A.	N.A.	0.985	26	5.24e-08	26	1	2	3	4	Italy; Belgium	Textile effluents; Textile WWTPs	38; 39							N.A.
Alkylphenols (APs) and Alkylphenols ethoxylated (APEOs)	4-n-Nonylphenol (4-NP)	104-40-5	SVHC candidate as ED and Annex XVII	YES	2	-	NO	-	NO	YES	220.35	5.76	25	N.A.	N.A.	7	25	0.00315		1	2	3	4	Italy; Belgium; Germany	WWTP receiving mixed textile-domestic wastewater; Textile WWTPs; Textile effluents; Clothes	38-44			0.0608	97	0.05	97	0.05	F	5e-05
Alkylphenols (APs) and Alkylphenols ethoxylated (APEOs)	4-n-octylphenol (4-n-OP)	1806-26-4	Not available	NO	1	-	NO	-	NO	YES	206.32	5.53	26	N.A.	N.A.	3.11	26	0.013	26	1	2	3	4	Canada	Textile WWTPs; River	43							N.A.
Alkylphenols (APs) and Alkylphenols ethoxylated (APEOs)	4-n-octylphenoxy- acetic acid (4n-OP1EC)	15234-85-2	Not available	NO	1	-	NO	-	NO	NO	264.36	5.31	26	N.A.	N.A.	1.42	26	0.000181	26	1	2	3	4	Italy; Belgium	Textile WWTPs; Textile effluents	38; 39							N.A.
Alkylphenols (APs) and Alkylphenols ethoxylated (APEOs)	4-nonyl-Phenol (branched)	84852-15-3	SVHC candidate as ED and Annex XVII	YES	2; 3	-	NO	-	NO	YES	220.35	5.6	(Computed by XLogP3 3.0 release 2021.10.14) 25	N.A.	N.A.	N.A.	N.A.	N.A.	N.A.	1	2	3	4	Italy	WWTP receiving mixed textile-domestic wastewater	42			0.17	97	0.1351	97	0.13	F	0.00013
Alkylphenols (APs) and Alkylphenols ethoxylated (APEOs)	4-nonylphenol diethoxylate (NP2EO)	9016-45-9/68412-54-4/20427-84-3	SVHC candidate as ED and Annex XVII	YES	2; 3	-	NO	-	NO	YES	308.5	5.3	26	N.A.	N.A.	1.05	26	1.22e-06	26	1	2	3	4	Italy; Canada; Greece	WWTP receiving mixed textile-domestic wastewater; Textile WWTPs; River; Textile effluents	39; 41-43; 45; 46			0.148	97	1.3	97	0.148	D	0.000148
Alkylphenols (APs) and Alkylphenols ethoxylated (APEOs)	4-nonylphenol monoethoxylate (NP1EO)	26027-38-3/104-35-8/68131-40-8/127087-87-0	SVHC candidate as ED and Annex XVII	YES	2; 3	-	NO	-	NO	YES	264.4	4.48	26	N.A.	N.A.	1.1	26	2.37e-05	26	1	2	3	4	Italy; Canada; Germany; Greece	WWTP receiving mixed textile-domestic wastewater; Textile WWTPs; River; Textile effluents	40-43; 45	17	97	18.2	97	16.4	97	16.4	F	0.0164
Alkylphenols (APs) and Alkylphenols ethoxylated (APEOs)	4-tert-Octylphenol (4-t-OP)	140-66-9	SVHC candidate as ED	YES	3	-	NO	-	NO	YES	206.32	4.86	25	N.A.	N.A.	5.36	25	0.064	25	1	2	3	4	Italy; China; Canada; Greece	WWTP receiving mixed textile-domestic wastewater; Textile WWTPs; River	34; 39; 42; 45; 46			0.09	97	0.37	97	0.09	D	9e-05
Alkylphenols (APs) and Alkylphenols ethoxylated (APEOs)	4-tert-Octylphenol diethoxylate (OP2EO)	1173020-69-3	Not available	NO	1	-	NO	-	NO	YES	300.38	4.5	(Computed by XLogP3 3.0 release 2021.10.14) 25	N.A.	N.A.	N.A.	N.A.	N.A.	N.A.	1	2	3	4	Italy; Greece	WWTP receiving mixed textile-domestic wastewater; Textile WWTPs	39; 42; 45							N.A.
Alkylphenols (APs) and Alkylphenols ethoxylated (APEOs)	4-tert-Octylphenol monoethoxylate (OP1EO)	1173019-48-1	Not available	NO	1	-	NO	-	NO	YES	256.33	4.6	(Computed by XLogP3 3.0 release 2021.10.14) 25	N.A.	N.A.	N.A.	N.A.	N.A.	N.A.	1	2	3	4	Italy; Greece	WWTP receiving mixed textile-domestic wastewater; Textile WWTPs	39; 42; 45							N.A.
Alkylphenols (APs) and Alkylphenols ethoxylated (APEOs)	4-tert-Octylphenoltriethoxylate (4-t-OP3EO)	2315-62-0	Not available	NO	1	-	NO	-	NO	YES	338.5	4.31	26	N.A.	N.A.	4.86	26	1.03e-06	26	1	2	3	4	Italy	Textile WWTPs	39							N.A.
Alkylphenols (APs) and Alkylphenols ethoxylated (APEOs)	Nonylphenol (NP) (2-nonylphenol)	25154-52-3	SVHC candidate as ED and Annex XVII	YES	2; 3	-	NO	-	NO	YES	220.35	5.71	25	10.25	25	4.9	25	0.0125	25	1	2	3	4	Canada; Greece	Textile effluents; Textile WWTPs	45; 46			0.18	97	0.096	97	0.096	F	9.6e-05
Alkylphenols (APs) and Alkylphenols ethoxylated (APEOs)	Nonylphenol mono ethoxy carboxylate (NP1EC)	3115-49-9	Not available	NO	1	-	NO	-	NO	NO	278.4	5.8	26	N.A.	N.A.	0.449	26	0.00131	26	1	2	3	4	Italy; Belgium	Textile effluents	38							N.A.
Alkylphenols (APs) and Alkylphenols ethoxylated (APEOs)	Nonylphenol diethoxy-carboxylate (NP2EC) or nonylphenoxyethoxyacetic acid	106807-78-7/28212-44-4/494208-94-5/494208-93-4	Not available	NO	1	-	NO	-	NO	NO	322.445	5.53	26	N.A.	N.A.	0.426	26	6.34e-06	26	1	2	3	4	Italy; Belgium	Textile effluents	38							N.A.
Alkylphenols (APs) and Alkylphenols ethoxylated (APEOs)	Nonylphenol triethoxy carboxylate (NP3EC)	108149-59-3/494208-95-6	Not available	NO	1	-	NO	-	NO	NO	366.498	5.26	26	N.A.	N.A.	0.397	26	4.3e-07	26	1	2	3	4	Italy; Belgium	Textile effluents	38							N.A.
Alkylphenols (APs) and Alkylphenols ethoxylated (APEOs)	Octylphenol di-carboxylic acid (OPE2C)	108241-00-5/154826-10-5/32028-04-9	Not available	NO	1	-	NO	-	NO	NO	308.4	5.4	(Computed by XLogP3 3.0 release 2021.10.14) 25	N.A.	N.A.	N.A.	N.A.	N.A.	N.A.	1	2	3	4	Italy; Belgium	Textile effluents	38							N.A.
Amides	Caprolactam	105-60-2	Not available	NO	1	-	NO	-	NO	NO	113.16	0.66	26	N.A.	N.A.	28700	26	0.213	26	1				China; Croatia	Textile WWTPs; River	34; 36; 47							N.A.
Amides	Diethyltoluamide (DEET)	134-62-3	Not available	NO	1	-	NO	-	NO	NO	191.27	2.02	26	N.A.	N.A.	666	26	0.267	26	1		3	4	China	Textile WWTPs; River	34			130	97	235	97	130	D	0.13
Amides	Lauryl diethanolamide	120-40-1	Not available	NO	1	-	NO	-	NO	NO	287.44	2.89	26	N.A.	N.A.	49.9	26	8.97e-07	26		2	3	4	Croatia	River	47							N.A.
Amides	Oleamide	301-02-0	Not available	NO	1	-	NO	-	NO	NO	281.5	6.48	26	N.A.	N.A.	0.0459	26	2.08e-05	26		2	3	4	China	Textile effluents	36							N.A.
Amides	Tyramine, N-aminoacetyl-	55710-99-1	Not available	NO	1	-	NO	-	NO	NO	194.23	-0.05	26	N.A.	N.A.	9590	26	1.21e-05	26	N.A.	N.A.	N.A.	N.A.	Morocco	Textile effluents	35							N.A.
Amides	2-Pyrrolidinone	616-45-5	Not available	NO	1	-	NO	-	NO	NO	85.1	-0.85	25	14.7	25	N.A.	N.A.	1.27	25		2	3		China	Textile WWTPs; River	34			3.4	97	> 100	97	3.4	D	0.0034
Amides	1,8-Diazacyclotetradecane-2,9-dione	56403-09-9	Not available	NO	1	-	NO	-	NO	NO	226.32	1.1	26	N.A.	N.A.	3660	26	3.8e-07	26		2	3		China	River	34							N.A.
Amines	4,4-Ethylenedioxy-1-pentylamine	66442-97-5	Not available	NO	1	-	NO	-	NO	NO	145.2	0.78	26	N.A.	N.A.	175000	26	31.6	26	N.A.	N.A.	N.A.	N.A.	Morocco	Textile effluents	35							N.A.
Amines	N-cyclohexyl-Cyclohexanamine	10468-40-3	Not available	NO	1	-	NO	-	NO	NO	179.3	4.92	26	N.A.	N.A.	3.47	26	3.41	26		2	3		China	River	34							N.A.
Amines	N-demethyltramadol	73806-55-0	Not available	NO	1	-	NO	-	NO	NO	249.35	2.8	26	N.A.	N.A.	985	26	6.32e-05	26	N.A.	N.A.	N.A.	N.A.	China	Textile effluents	36							N.A.
Amines	Bicyclohexyl-2-amine	6283-14-3	Not available	NO	1	-	NO	-	NO	NO	181.32	4.32	26	N.A.	N.A.	113	26	1.12	26		2	3		China	River	34							N.A.
Amines	N,N-Diethylbenzylamine	772-54-3	Not available	NO	1	-	NO	-	NO	NO	163.26	2.73	26	N.A.	N.A.	3150	26	10.9	26		2	3		China	River	34							N.A.
Aminoacids	DL-Carnitine	406-76-8	Not available	NO	1	-	NO	-	NO	NO	161.2	-5.48	26	N.A.	N.A.	1000000	26	1.84e-08	26	N.A.	N.A.	N.A.	N.A.	China	Textile effluents	36							N.A.
Aromatic amines	1-Amino-2-naphthol	2834-92-6	Not available	NO	1	-	NO	-	NO	NO	159.18	1.77	26	N.A.	N.A.	2120	26	0.00172	26		2	3		China	Textile WWTPs	36							N.A.
Aromatic amines	2,4-Dinitroaniline	97-02-9	Not available	NO	1	-	NO	-	NO	NO	183.12	1.84	25	18.4	25	315000	25	2.6e-10	25		2	3		Sweden	Clothes	44					15.1	97	15.1	F	0.0151
Aromatic amines	2,5-Dimethoxyaniline	102-56-7	Not available	NO	1	-	NO	-	NO	NO	153.18	1.24	26	N.A.	N.A.	6940	26	0.356	26		2	3		China	Textile WWTPs; River	34							N.A.
Aromatic amines	2,6-Dichloro-4-nitroaniline	99-30-9	Not available	NO	1	-	NO	-	NO	NO	207.01	2.8	25	3.31	25	164	26	0.00026	25	1	2	3		Sweden	Clothes	44					1.6	97	1.6	F	0.0016
Aromatic amines	2-Bromo-4,6-dinitroaniline	1817-73-8	Not available	NO	1	-	NO	-	NO	NO	262.02	2.73	26	N.A.	N.A.	95.2	26	0.000269	26		2	3		Sweden	Clothes	44							N.A.
Aromatic amines	3,3-dimethoxybenzidine (DMOB)	119-90-4	Carcinogen (1B) with specific concentration limits and Annex XVII	YES	4; 5	-	NO	-	NO	YES	244.29	1.8	25	N.A.	N.A.	60	25	1.17e-06	30		2	3		China	Textile WWTPs (sludge)	48	13.8	98	6.1	98	25.8	98	6.1	D	0.0061
Aromatic amines	3,4-dichloroaniline	95-76-1	Not available		1	-	NO	-	NO	NO	162.01	2.69	25	N.A.	N.A.	338	26	0.843	26	1	2	3	4	China	Textile WWTPs; River; Clothes	34; 49	2.2	97	0.01	97	3.35	97	0.01	D	1e-05
Aromatic amines	2-Methoxy-4-nitroaniline	97-52-9	Not available		1	-	NO	-	NO	NO	168.15	1.85	26	1.02	25	N.A.	N.A.	N.A.	N.A.		2	3		Switzerland	Clothes	49							N.A.
Aromatic amines	2-Amino-4-nitrophenol	99-57-0	Not available		1	-	NO	-	NO	NO	154.12	1.26	25	N.A.	N.A.	925	25	0.00469	25		2	3		Switzerland	Clothes	49			0.039	97			0.039	D	3.9e-05
Aromatic amines	2-Amino-4-nitroanisol	99-59-2	Not available		1	-	NO	-	NO	NO	168.15	1.47	25	2.49	25	115	25	0.0425	25		2	3		Switzerland	Clothes	49							N.A.
Aromatic amines	2-Amino-5-nitrothiazol	121-66-4	Not available		1	-	NO	-	NO	NO	145.14	0.83	25	N.A.	N.A.	N.A.	N.A.	0.0991	25		2	3		Switzerland	Clothes	49							N.A.
Aromatic amines	2-Amino-5-nitrophenol	121-88-0	Not available		1	-	NO	-	NO	NO	154.12	1.5	25	N.A.	N.A.	N.A.	N.A.	0.00469	25		2	3		Switzerland	Clothes	49			0.087	97			0.087	D	8.7e-05
Aromatic amines	4-Aminophenol	123-30-8	Not available		1	CoRAP - Need for follow-up regulatory action at EU level and CLH	YES	-	NO	NO	109.13	0.04	25	N.A.	N.A.	1600	at (20°C) 25	0.00533	25		2	3		Switzerland	Clothes	49			1.43	97			1.43	F	0.00143
Aromatic amines	2-Amino-6methoxybenzothiazole	1747-60-0	Not available		1	-	NO	-	NO	NO	180.23	2.4	25	4.5	N.A.	N.A.	N.A.	N.A.	N.A.		2	3		Switzerland	Clothes	49							N.A.
Aromatic amines	4-Nitro-1,3phenylenediamine	5131-58-8	Not available		1	-	NO	-	NO	NO	153.14	0.5	25	N.A.	N.A.	N.A.	N.A.	0.00747	25		2	3		Switzerland	Clothes	49							N.A.
Aromatic amines	2-Amino-6nitrobenzothiazole	6285-57-0	Not available		1	-	NO	-	NO	NO	195.2	2.1	25	N.A.	N.A.	N.A.	N.A.	N.A.	N.A.		2	3		Switzerland	Clothes	49							N.A.
Aromatic amines	3-Amino-5-nitro-2,1benzisothiazole	14346-19-1	Not available		1	-	NO	-	NO	NO	195.2	1.8	25	N.A.	N.A.	N.A.	N.A.	N.A.	N.A.		2	3		Switzerland	Clothes	49							N.A.
Aromatic amines	2,5-Diaminotoluene	95-70-5	Not available		1	-	NO	-	NO	NO	122.17	0.16	25	N.A.	N.A.	N.A.	N.A.	0.453	25		2	3		Switzerland	Clothes	49					12	97	12	F	0.012
Aromatic amines	1,3-Phenylenediamine-4sulfonic acid	88-63-1	Not available		1	-	NO	-	NO	NO	188.21	-1	(Computed by XLogP3 3.0 release 2021.10.14) 25	N.A.	N.A.	N.A.	N.A.	N.A.	N.A.		2	3		Switzerland	Clothes	49							N.A.
Aromatic amines	N,N-Dimethyl-1,4phenylenediamine	99-98-9	Not available		1	CoRAP - Need for follow-up regulatory action at EU level and CLH	YES	-	NO	NO	136.19	1.8	25	N.A.	N.A.	N.A.	N.A.	1.05	25		2	3		Switzerland	Clothes	49							N.A.
Aromatic amines	4-Aminodiphenylamine	101-54-2	Not available		1	-	NO	-	NO	NO	184.24	2.4	25	5.2	25	N.A.	N.A.	0.00161	25		2	3		Switzerland	Clothes	49							N.A.
Aromatic amines	p-Phenylenediamine	106-50-3	Not available		1	-	NO	-	NO	NO	108.14	-0.25	25	6.2	25	N.A.	N.A.	0.667	25		2	3		Switzerland	Clothes	49					20	97	20	F	0.02
Aromatic amines	4-Aminobenzene sulfonic acid	121-57-3	Not available		1	-	NO	-	NO	NO	173.19	-2.16	25	3.25	25	N.A.	N.A.	2.67e-05	25		2	3		Switzerland	Clothes	49					100.4	97	100.4	F	0.1004
Aromatic amines	4-Ethoxyaniline	156-43-4	Not available		1	-	NO	-	NO	NO	137.18	1.24	25	N.A.	N.A.	N.A.	N.A.	464	25		2	3		Switzerland	Clothes	49							N.A.
Aromatic amines	4-(N,N-Diethyl)-2-methyl-p-phenylenediamine monohydrochloride	2051-79-8	Not available		1	-	NO	-	NO	NO	214.73	2	(Computed by Cactvs 3.4.8.18 - release 2021.10.14) 25	N.A.	N.A.	N.A.	N.A.	N.A.	N.A.		2	3		Switzerland	Clothes	49			0.44	97			0.44	D	0.00044
Aromatic amines	1,4-Diamino-2methoxybenzene	5307-02-8	Not available		1	-	NO	-	NO	NO	138.17	0.5	25	N.A.	N.A.	N.A.	N.A.	0.176	25		2	3		Switzerland	Clothes	49							N.A.
Aromatic amines	3,5-Dichloroaniline	626-43-7	Not available		1	-	NO	-	NO	NO	162.01	2.9	25	2.37	25	224	26	1.13	26		2	3		China	Textile WWTPs; River	34	7.5	97	1.12	97	8.19	97	1.12	D	0.00112
Aromatic amines	3-Nitroaniline	99-09-2	Not available		1	-	NO	-	NO	NO	138.12	1.37	25	2.46	25	1000000	26	0.0127	25		2	3		Croatia	River	47					85.9	97	85.9	F	0.0859
Aromatic amines	4- aminobiphenyl (ABP)	92-67-1	Carcinogen (1B) with specific concentration limits and Annex XVII	YES	4; 6	-	NO	-	NO	YES	169.22	2.86	25	4.35	25	224	26	0.0427	25		2	3		China	Textile WWTPs (sludge)	48							N.A.
Aromatic amines	4,4′-bi-o-Toluidine / 3,3'-Dimethylbenzidine	119-93-7	Carcinogen (1B) with specific concentration limits and Annex XVII	YES	4; 6	-	NO	-	NO	YES	212.29	2.34	25	4.5; 3.3	25	1300	25	0.0227	25		2	3		Croatia	River	47	3.7	97					3.7	A	0.0037
Aromatic amines	4,4-diamino diphenyl methane (DDM) or 4,4'-Methylenedianiline (MDA)	101-77-9	Carcinogen (1B) with specific concentration limits and Annex XIV, SVHC ( C )	YES	4; 7	-	NO	-	NO	YES	198.26	1.59	25	N.A.	N.A.	1000	25	2.71e-05	25		2	3		China	Textile WWTPs (sludge)	48	21	99	2.3	99	42	99	2.3	D	0.0023
Aromatic amines	4',4'-methylene-bis(2-chloroaniline) (MBCA)	101-14-4	Carcinogen (1B) with specific concentration limits and Annex XVII	YES	4; 5	-	NO	-	NO	YES	267.15	3.91	25	N.A.	N.A.	8.68	26	0.000524	26		2	3		China	Textile WWTPs (sludge)	48	1.82	100	0.25	100	1.24	100	0.25	D	0.00025
Aromatic amines	4-chloroaniline	106-47-8	Carcinogen (1B) with specific concentration limits and Annex XVII	YES	4; 5	-	NO	-	NO	YES	127.57	1.83	25	3.98	25	2570	26	9.47	25	1	2	3		China	Textile WWTPs; River	34; 48	2.4	97	0.05	97	34.4	97	0.05	D	5e-05
Aromatic amines	4-Nitroaniline	100-01-6	Not available		1	-	NO	-	NO	NO	138.12	1.39	25	N.A.	N.A.	5540	26	0.000427	26	1	2	3	4	Croatia	River; Clothes	47; 49	68	97	20	97	87.6	97	20	D	0.02
Aromatic amines	5-nitro-o-toluidine (NT)	99-55-8	Carcinogen (1B) with specific concentration limits and Annex XVII	YES	4; 5	-	NO	-	NO	YES	152.15	1.87	25	2.345	25	N.A.	N.A.	0.13	25		2	3		China	Textile WWTPs (sludge)	48					5.1	97	5.1	D	0.0051
Aromatic amines	6-Chloro-2,4-dinitroaniline	3531-19-9	Not available		1	-	NO	-	NO	NO	217.57	2.48	26	N.A.	N.A.	270	26	0.00098	26	1	2	3		Sweden	Clothes	44							N.A.
Aromatic amines	Chloronitroaniline (N-chloro-N-phenylnitramide)	41587-36-4	Not available		1	-	NO	-	NO	NO	172.57	2.9	(Computed by XLogP3 3.0 release 2019.06.18) 25	N.A.	N.A.	N.A.	N.A.	N.A.	N.A.		2	3		Sweden	Clothes	44							N.A.
Aromatic amines	2-methoxy-5-methylaniline (p-Cresidine)	120-71-8	Carcinogen (1B) with specific concentration limits and Annex XVII	YES	4; 5	-	NO	-	NO	YES	137.18	1.74	26	N.A.	N.A.	2810	26	4.21	26		2	3		China	Textile WWTPs	48							N.A.
Aromatic amines	o-Toluidine	95-53-4	Carcinogen (1B) with specific concentration limits and Annex XVII	YES	4; 5	-	NO	-	NO	YES	107.15	1.32	25	4.44	25	16600	25	34.7	25		2	3		China	Textile WWTPs	48			0.52	97			0.52	D	0.00052
Aromatic amines	2,4-dimethylaniline (2,4-DMA)	95-68-1	Specific concentration limits	YES	4	-	NO	-	NO	YES	121.18	1.68	25	4.89	25	3650	26	17.7	25		2	3		China	Textile WWTPs; Clothes	48; 49					196	97	196	F	0.196
Aromatic amines	2,6-dimethylaniline (2,6-DMA)	87-62-7	Specific concentration limits	YES	4	-	NO	-	NO	YES	121.18	1.84	25	3.95	25	2670	26	16.7	25		2	3		China	Textile WWTPs; Clothes	48; 49					112	97	112	F	0.112
Aromatic amines	2-aminoanisole (MOA) or o-Anisidine	90-04-0	Carcinogen (1B) with specific concentration limits and Annex XVII	YES	4; 5	-	NO	-	NO	YES	123.15	1.18	25	4.53	25	13000	25	10.7	25		2	3		China	Textile WWTPs	48			12	97			12	D	0.012
Aromatic amines	2,4,5-trimethylaniline (TMA)	137-17-7	Carcinogen (1B) with specific concentration limits and Annex XVII	YES	4; 5	-	NO	-	NO	YES	135.21	2.27	25	5.09	25	1010	26	1.2	26		2	3		China	Textile WWTPs	48							N.A.
Aromatic amines	4-chloro-o-toluidine (CT)	95-69-2	Carcinogen (1B) with specific concentration limits and Annex XVII	YES	4; 5	-	NO	-	NO	YES	141.6	2.27	25	3.85	25	954	26	4.32	26		2	3		China	Textile WWTPs	48							N.A.
Aromatic amines	2,4-toluenediamine (TDA)	95-80-7	Carcinogen (1B) with specific concentration limits and Annex XVII	YES	4; 5	-	NO	-	NO	YES	122.17	0.14	25	N.A.	N.A.	74800	26	0.0227	25		2	3		China	Textile WWTPs	48					912	97	912	F	0.912
Aromatic amines	2,4-diaminoanisole (DAA)	615-05-4	Carcinogen (1B) with specific concentration limits and Annex XVII	YES	4; 5	-	NO	-	NO	YES	138.17	-0.31	25	N.A.	N.A.	157000	26	6.17	26		2	3		China	Textile WWTPs	48							N.A.
Aromatic amines	2-naphthylamine (NA)	91-59-8	Carcinogen (1B) with specific concentration limits and Annex XVII	YES	4; 5	-	NO	-	NO	YES	143.18	2.28	25	4.16	25	917	26	0.0341	25		2	3		China	Textile WWTPs	48							N.A.
Aromatic amines	4,4'-diaminodiphenyl ether (DDE)	101-80-4	Carcinogen (1B) with specific concentration limits and Annex XVII	YES	4; 5	-	NO	-	NO	YES	200.24	1.36	25	N.A.	N.A.	3010	26	0.000337	26		2	3		China	Textile WWTPs	48							N.A.
Aromatic amines	benzidine (BNZ)	92-87-5	Carcinogen (1B) with specific concentration limits and Annex XVII	YES	4; 5	-	NO	-	NO	YES	184.24	1.34	25	4.3; 3.3	25	3770	26	0.00012	26		2	3		China	Textile WWTPs	48					2.5	97	2.5	F	0.0025
Aromatic amines	3'-dimethyl-4,4'-diaminobiphenylmethane (DMDAB)	838-88-0	SVHC candidate as C with specific concentration limits and Annex XVII	YES	3; 4	-	NO	-	NO	YES	226.32	3.28	26	N.A.	N.A.	50.7	26	0.000121	26		2	3		China	Textile WWTPs	48							N.A.
Aromatic amines	4,4'-thiobisbenzenamine (TOA)	139-65-1	Carcinogen (1B) with specific concentration limits and Annex XVII	YES	4; 5	-	NO	-	NO	YES	216.3	2.18	26	N.A.	N.A.	495	26	0.00147	26		2	3		China	Textile WWTPs	48							N.A.
Aromatic amines	3,3-dichloro benzidine (DCB)	91-94-1	Carcinogen (1B) with specific concentration limits and Annex XVII	YES	4; 5	-	NO	-	NO	YES	253.12	3.51	25	1.6; 3.2	25	3.1	25	0.000555	26		2	3		China	Textile WWTPs	48			1.05	97	1.05	97	1.05	D-F	0.00105
Aromatics	4-nitrotoluene	99-99-0	Not available	NO	1	-	NO	-	NO	NO	137.14	2.37	25	N.A.	N.A.	361	25	2.09	25		2	3		Turkey	Textile WWTPs; River	50	22	97	7.5	97	49.7	97	7.5	D	0.0075
Aromatics	1,2,3-trimethylbenzene (Hemimellitene)	526-73-8	Not available	NO	1	-	NO	-	NO	NO	120.19	3.66	26	N.A.	N.A.	75	26	225	26		2	3		China	River	34							N.A.
Aromatics	Musk Ambrette	83-66-9	Not available	NO	1	-	NO	-	NO	NO	268.27	4.17	26	N.A.	N.A.	2.11	26	0.00175	26		2	3		China	River	34							N.A.
Bisphenol A -related compounds	3 RING-Novolac glycidyl ether 3R-NOGE	158163-01-0	Not available	NO	1	-	NO	-	NO	NO	474	N.A.	N.A.	N.A.	N.A.	N.A.	N.A.	N.A.	N.A.				4	Albany; USA	Clothes	51							N.A.
Bisphenol A -related compounds	4-RING - Novolac glycidyl ether (4R-NOGE)	N.A.	Not available	NO	1	-	NO	-	NO	NO	-	N.A.	N.A.	N.A.	N.A.	N.A.	N.A.	N.A.	N.A.				4	Albany; USA	Clothes	51							N.A.
Bisphenols	Bisphenol A (3-chloro-2-hydroxypropyl) (2,3-dihydroxypropyl) ether	227947–06-0	Not available	NO	1	-	NO	-	NO	NO	394.9	3.25	26	N.A.	N.A.	5.54	26	2.24e-12	26				4	Albany; USA	Clothes	51							N.A.
Bisphenols	Bisphenol A bis (2,3-dihydroxypropyl) ether	5581-32-8	Not available	NO	1	-	NO	-	NO	NO	376.4	1.93	26	N.A.	N.A.	96.2	26	7.4e-13	26				4	Croatia; China	River; Clothes	47; 51							N.A.
Bisphenols	Bisphenol A diglycidyl ether (BADGE)	1675-54-3	Not available	NO	1	CoRAP - No need for follow up	YES	-	NO	NO	340.4	3.84	26	N.A.	N.A.	3.69	26	1.44e-05	26				4	Albany; USA	Clothes	51							N.A.
Bisphenols	Bisphenol A/ 4,4'-(1-methylethyldiene)bis-phenol (BPA)	80-05-7	Annex XVII and SVHC candidate as TR and ED	YES	3; 7	-	NO	-	NO	YES	228.29	3.32	25	9.6	25	120	25	5.33e-06	25				4	China; Italy; Belgium; Canada; Korea; Greece; USA; Chile; Japan; Portugal; Albany; Spain	Textile WWTPs; River; Textile effluents; Sludge receiving textile wastewater; Clothes	34; 38; 41; 45; 46; 51-55	2.7	97	8.11	97	4.2	97	2.7	A	0.0027
Bisphenols	Bisphenol AF (4,4 -(hexafluoro- isopropylidene)diphenol) (BPAF)	1478-61-1	Not available	NO	1	-	NO	-	NO	YES	336.23	4.47	26	N.A.	N.A.	4.3	26	6.97e-05	26				4	Korea; Portugal; USA; China; Chile; Japan; Albany	Sludge receiving textile wastewater; Clothes	51-53			3.05	97	0.27	97	0.27	F	0.00027
Bisphenols	Bisphenol AP (4,4 -(1-phenylethyli- dene)bisphenol) (BPAP)	1571-75-1	Not available	NO	1	-	NO	-	NO	NO	290.4	4.86	26	N.A.	N.A.	3.76	26	1.27e-07	26				4	Korea	Sludge receiving textile wastewater; Clothes	51; 52					1.27	97	1.27	F	0.00127
Bisphenols	Bisphenol B (2,2-bis(4-hydroxyphenyl) butane (BPB)	77-40-7	SVHC candidate as ED	YES	3	-	NO	-	NO	NO	242.31	4.13	26	N.A.	N.A.	29.2	26	3.29e-05	26				4	Korea; Portugal; USA; China; Chile; Japan; Albany	Sludge receiving textile wastewater; Clothes	52; 53					3.52	97	3.52	F	0.00352
Bisphenols	Bisphenol F (4,4-dihydroxydiphenylmethane) (BPF)	620-92-8	Not available	NO	1	-	NO	-	NO	YES	200.23	2.91	25	7.55; 10.80	25	543	26	4.96e-05	26				4	Korea; Portugal; USA; China; Chile; Japan; Albany	Sludge receiving textile effluents; Textile effluents; Clothes	52; 51; 56					24.5	97	24.5	F	0.0245
Bisphenols	Bisphenol F bis(2,3-dihydroxypropyl) ether (BFDGE- 2H2O)	72406–26-9	Not available	NO	1	-	NO	-	NO	NO	348.4	1.34	26	N.A.	N.A.	453	26	2.09e-12	26					Albany; USA	Clothes	51							N.A.
Bisphenols	Bisphenol F diglycidyl ether (BFDGE)	2095-03-6	Not available	NO	1	-	NO	-	NO	NO	312.4	3.26	26	N.A.	N.A.	17.2	26	3.11e-05	26				4	Albany; USA	Clothes	51							N.A.
Bisphenols	bisphenol P (4,4 -(1,4-phenylenediisopropylidene) bisphenol (BPP)	2167-51-3	Not available	NO	1	-	NO	-	NO	NO	346.5	6.25	26	N.A.	N.A.	0.113	26	8.01e-09	26				4	Korea; Portugal; USA; China; Chile; Japan; Albany	Sludge receiving textile wastewater; Clothes	52; 53							N.A.
Bisphenols	Bisphenol S (4,4-sulfonyldiphenol) (BPS)	80-09-1	SVHC candidate as ED and TR	YES	3	-	NO	-	NO	YES	250.27	1.65	26	N.A.	N.A.	3520	26	6.29e-08	26				4	Korea; Portugal; USA; China; Chile; Japan; Albany	Sludge receiving textile wastewater; Clothes	51- 54					198.76	97	198.76	F	0.19876
Bisphenols	Bisphenol Z (4,4- cyclohexylidenebisphenol) (BPZ)	843-55-0	Not available	NO	1	-	NO	-	NO	NO	268.3	5	26	N.A.	N.A.	3.78	26	1.17e-06	26				4	Korea; Portugal; USA; China; Chile; Japan; Albany	Sludge receiving textile wastewater; Clothes	52; 53							N.A.
Carboxylic acid-related compounds	Acetic acid, hydrazide	1068-57-1	Not available	NO	1	-	NO	-	NO	NO	74.08	-1.58	26	N.A.	N.A.	147000	26	5.4	26	N.A.	N.A.	N.A.	N.A.	Morocco	Textile effluents	35							N.A.
Carboxylic acid-related compounds	Propanoic acid, 2,2-dimethyl-, hydrazide	42826-42-6	Not available	NO	1	-	NO	-	NO	NO	116.16	-0.35	26	N.A.	N.A.	10100	26	0.783	26	N.A.	N.A.	N.A.	N.A.	Morocco	Textile effluents	35							N.A.
Carboxylic acids	4-Methoxycinnamic acid	830-09-1	Not available	NO	1	-	NO	-	NO	NO	178.18	2.68	26	N.A.	N.A.	717.7	26	0.0212	26	N.A.	N.A.	N.A.	N.A.	China	Textile effluents	36							N.A.
Carboxylic acids	5,5-diphenyl-4H-1,2-oxazole-3-carboxylic acid ( Isoxadifen )	209866-92-2	Not available	NO	1	-	NO	-	NO	NO	267.28	4.88	26	N.A.	N.A.	3.18	26	9.84e-06	26	1		3		China	Textile WWTPs; River	34							N.A.
Carboxylic acids	Azelaic acid	123-99-9	Not available	NO	1	-	NO	-	NO	NO	188.22	1.57	26	N.A.	N.A.	5680	26	0.00305	26		2	3	4	Croatia	River	47							N.A.
Carboxylic acids	Benzoic acid, 2,3-dimethyl-6-(3-methyl-1-oxobutyl)	71940-32-4	Not available	NO	1	-	NO	-	NO	NO	234.29	2.95	26	N.A.	N.A.	87.4	26	0.000603	26		2	3		Morocco	Textile effluents	35							N.A.
Carboxylic acids	Dodecanoic acid	143-07-7	Not available	NO	1	-	NO	-	NO	NO	200.32	4.6	26	N.A.	N.A.	12.8	26	0.00213	26	1	2	3		Morocco	Textile effluents	35							N.A.
Carboxylic acids	(R)-3-Hydroxy myristic acid	1961-72-4	Not available	NO	1	-	NO	-	NO	NO	244.37	4.44	26	N.A.	N.A.	3.29	26	1.93e-05	26	N.A.	N.A.	N.A.	N.A.	China	Textile effluents	36							N.A.
Carboxylic acids	10-Propoxydecanoic acid	119290-12-9	Not available	NO	1	-	NO	-	NO	NO	230.34	4.23	26	N.A.	N.A.	18.3	26	0.00652	26	N.A.	N.A.	N.A.	N.A.	China	Textile effluents	36							N.A.
Carboxylic acids	2-Hydroxysebacic acid	103963-71-9	Not available	NO	1	-	NO	-	NO	NO	218.25	0.97	26	N.A.	N.A.	42300	26	2.05e-06	26	1				Croatia	River	47							N.A.
Carboxylic acids	3,5-Di-tert-butyl-4-hydroxybenzoic acid	1421-49-4	Not available	NO	1	-	NO	-	NO	NO	250.33	4.36	26	N.A.	N.A.	16.8	26	1.41e-05	26	N.A.	N.A.	N.A.	N.A.	Portugal	Textile WWTPs	56							N.A.
Carboxylic acids	3-Amino-3-(2,4-dichloro-phenyl)-propionic acid	152606-17-2	Not available	NO	1	-	NO	-	NO	NO	234.08	-1.17	26	N.A.	N.A.	2460	26	1.92e-07	26	N.A.	N.A.	N.A.	N.A.	Morocco	Textile effluents	35							N.A.
Carboxylic acids	3-Methoxyphenylacetic acid	1798-09-0	Not available	NO	1	-	NO	-	NO	NO	166.17	1.5	26	N.A.	N.A.	8330	26	0.103	26	N.A.	N.A.	N.A.	N.A.	China	Textile effluents	36							N.A.
Carboxylic acids	4-(1H-tetrazol-1-ylmethyl)benzoic acid	728024-58-6	Not available	NO	1	-	NO	-	NO	NO	204.19	0.55	26	N.A.	N.A.	14000	26	0.000267	26	N.A.	N.A.	N.A.	N.A.	Morocco	Textile effluents	35							N.A.
Carboxylic acids	Benzoic acid	65-85-0	Not available	NO	1	-	NO	-	NO	NO	122.12	1.87	25	4.2	25	3500	25	0.0933	25		2	3	4	Croatia	River	35	82.39	97			180	97	82.39	A	0.08239
Carboxylic acids	Butanoic acid, 3-hydroxy-3-methyl-	625-08-1	Not available	NO	1	-	NO	-	NO	NO	118.13	6.3	25	N.A.	N.A.	N.A.	N.A.	N.A.	N.A.					Morocco	Textile effluents	35							N.A.
Carboxylic acids	Isocrotonic acid (2-Butanoic acid)	503-64-0	Not available	NO	1	-	NO	-	NO	NO	86.09	0.72	26	N.A.	N.A.	76600	26	43.3	26	1	2	3	4	Morocco	Textile effluents	35							N.A.
Carboxylic acids	Methanetetracarboxylic acid	193197-67-0	Not available	NO	1	-	NO	-	NO	NO	192.08	-1.1	(Computed by XLogP3 3.0 release 2021.10.14) 25	N.A.	N.A.	N.A.	N.A.	N.A.	N.A.	N.A.	N.A.	N.A.	N.A.	Morocco	Textile effluents	35							N.A.
Carboxylic acids	n-Hexadecanoic acid	57-10-3	Not available	NO	1	-	NO	-	NO	NO	256.42	7.17	25	N.A.	N.A.	0.04	25	5.07e-05	25	N.A.	N.A.	N.A.	N.A.	Morocco	Textile effluents	35							N.A.
Carboxylic acids	Nor-9-carboxy-δ9-THC	56354-06-4	Not available	NO	1	-	NO	-	NO	NO	344.4	6.36	26	N.A.	N.A.	0.234	26	2.53e-08	26	N.A.	N.A.	N.A.	N.A.	China	Textile effluents	36							N.A.
Carboxylic acids	Stearic acid	57-11-4	Not available	NO	1	-	NO	-	NO	NO	284.5	8.23	26	N.A.	N.A.	0.00351	26	0.00111	26		2	3		China	Textile effluents	36							N.A.
Chlorophenols	2,3,4,5-Tetrachlorophenol	4901-51-3	Not available	NO	1	-	NO	-	NO	YES	231.9	4.21	25	6.35	25	28.7	26	0.0216	26	1	2	3	4	China	Textile WWTPs	57					0.205	97	0.21	F	0.00021
Chlorophenols	2,3,4,6-Tetrachlorophenol	58-90-2	Not available	NO	1	-	NO	-	NO	YES	231.9	4.45	25	5.22	25	17.9	26	0.564	26	1	2	3	4	China	Textile WWTPs	57	1.3	97	0.09	97	0.334	97	0.09	D	9e-05
Chlorophenols	2,3,4-Trichlorophenol	15950-66-0	Not available	NO	1	-	NO	-	NO	YES	197.4	3.45	26	N.A.	N.A.	97.5	26	0.208	26	1	2	3	4	China	Textile WWTPs	57					1.1	97	1.1	F	0.0011
Chlorophenols	2,3,5,6-Tetrachlorophenol	935-95-5	Not available	NO	1	-	NO	-	NO	YES	231.9	3.88	25	5.14	25	54.9	26	0.0224	26	1	2	3	4	China	Textile WWTPs	57			0.57	97	0.4	97	0.4	D	0.0004
Chlorophenols	2,3,5-Trichlorophenol	933-78-8	Not available	NO	1	-	NO	-	NO	YES	197.4	3.45	26	N.A.	N.A.	90.1	26	0.341	26	1	2	3	4	China	Textile WWTPs	57					0.8	97	0.8	F	0.0008
Chlorophenols	2,3,6-Trichlorophenol	933-75-5	Not available	NO	1	-	NO	-	NO	YES	197.4	3.77	26	5.8	26	103	26	0.373	26	1	2	3	4	China	Textile WWTPs	57					10.47	97	10.47	F	0.01047
Chlorophenols	2,3-Dichlorophenol	576-24-9	Not available	NO	1	-	NO	-	NO	YES	163	2.84	25	7.7	25	3600	25	7.73	25	1	2	3	4	China	Textile WWTPs	57	5	97			4	97	4	F	0.004
Chlorophenols	2,4,5-Trichlorophenol	95-95-4	Not available	NO	1	-	NO	-	NO	YES	197.4	3.72	25	7.43	25	1200	25	1	25	1	2	3	4	China	Textile WWTPs	57			2.7	97	0.45	97	0.45	F	0.00045
Chlorophenols	2,4,6,-Trichlorophenol	88-06-2	Not available	NO	1	-	NO	-	NO	YES	197.4	3.69	25	6.23	25	500	25	1.07	25	1	2	3	4	China	Textile WWTPs	57	3.5	97	0.27	97	0.18	97	0.18	F	0.00018
Chlorophenols	2,4-Dichlorophenol	120-83-2	Not available	NO	1	-	NO	-	NO	YES	163	3.06	25	7.89	25	614	26	12	25	1	2	3	4	China	Textile WWTPs	57	1.4	97	1.86	97	1.24	97	1.23	F	0.00123
Chlorophenols	2,5-Dichlorophenol	583-78-8	Not available	NO	1	-	NO	-	NO	YES	163	3.06	25	7.51	25	2000	25	7.49	25	1	2	3	4	China	Textile WWTPs	57					3.3	97	3.3	F	0.0033
Chlorophenols	2,6-Dichlorophenol	87-65-0	Not available	NO	1	-	NO	-	NO	YES	163	2.75	25	6.79	25	2650	25	4.4	25	1	2	3	4	China	Textile WWTPs	57	9.7	97	9.35	97	7.7	97	7.7	F	0.0077
Chlorophenols	2-Chlorophenol	95-57-8	Not available	NO	1	-	NO	-	NO	YES	128.55	2.15	25	N.A.	N.A.	5170	26	337	25	1	2	3	4	China	Textile WWTPs	57	70	97	2.6	97	6.6	97	2.6	D	0.0026
Chlorophenols	3,4,5-Trichlorophenol	609-19-8	Not available	NO	1	-	NO	-	NO	YES	197.4	4.01	25	7.84	25	64.5	26	0.0661	26	1	2	3	4	China	Textile WWTPs	57			0.39	97			0.39	D	0.00039
Chlorophenols	3,4-Dichlorophenol	95-77-2	Not available	NO	1	-	NO	-	NO	YES	163	3.33	25	8.63	25	361	26	0.495	26	1	2	3	4	China	Textile WWTPs	57	3.2	97	4	97	1.9	97	1.9	F	0.0019
Chlorophenols	3,5-Dichlorophenol	591-35-5	Not available	NO	1	-	NO	-	NO	YES	163	3.62	26	8.18	26	5380	26	1.12	26	1	2	3	4	China	Textile WWTPs	57	2.3	97	4.13	97	2.33	97	2.33	F-A	0.00233
Chlorophenols	3-Chlorophenol	108-43-0	Not available	NO	1	-	NO	-	NO	YES	128.55	2.5	25	N.A.	N.A.	2600	26	16.7	25	1	2	3	4	China	Textile WWTPs	57	29	97	5.6	97	4.5	97	4.5	F	0.0045
Chlorophenols	4-Chlorophenol	106-48-9	Not available	NO	1	-	NO	-	NO	YES	128.55	2.39	25	N.A.	N.A.	24000	25	11.6	25	1	2	3	4	China	Textile WWTPs	57	29	97	3.5	97	1.9	97	1.9	F	0.0019
Chlorophenols	Pentachlorophenol	87-86-5	POP and Annex XVII	YES	8; 4	-	NO	POP	YES	YES	266.3	5.12	25	4.7	25	3.09	26	0.0147	25	1	2	3	4	China; Korea; Japan; USA; Chile; Portugal; Albany	Textile WWTPs; Clothes	53; 57	0.09	97	0.038	97	0.011	97	0.011	F	1.1e-05
Chlorotoluenes	2,3- Dichlorotoluene	32768-54-0	Not available	NO	1	-	NO	-	NO	YES	161.03	3.96	26	N.A.	N.A.	28.1	26	33.1	26		2	3	4	Spain	River	58							N.A.
Chlorotoluenes	2,3,4-TriChlorotoluene	7359-72-0	Not available	NO	1	-	NO	-	NO	YES	195.5	4.56	26	N.A.	N.A.	5.89	26	3.28	26		2	3	4	Spain	River	58							N.A.
Chlorotoluenes	2,3,6- Trichlorotoluene	2077-46-5	Not available	NO	1	-	NO	-	NO	YES	195.5	4.47	26	N.A.	N.A.	6.97	26	9.76	26		2	3	4	Spain	River	58							N.A.
Chlorotoluenes	2,4- Dichlorotoluene	95-73-8	Not available	NO	1	-	NO	-	NO	YES	161.03	4.24	25	N.A.	N.A.	131	26	61.1	25		2	3	4	Spain	River	58							N.A.
Chlorotoluenes	2,4,5 -Trichlorotoluene	6639-30-1	Not available	NO	1	-	NO	-	NO	YES	195.5	4.56	26	N.A.	N.A.	5.89	26	2.64	26		2	3	4	Spain	River	58							N.A.
Chlorotoluenes	2,5- Dichlorotoluene	19398-61-9	Not available	NO	1	-	NO	-	NO	YES	161.03	3.97	26	N.A.	N.A.	27.6	26	48.1	26		2	3	4	Spain	River	58							N.A.
Chlorotoluenes	2,6-Dichlorotoluene	118-69-4	Not available	NO	1	-	NO	-	NO	YES	161.03	3.99	26	N.A.	N.A.	26.5	26	47.7	26		2	3	4	Spain	River	58							N.A.
Chlorotoluenes	2-Chlorotoluene	95-49-8	Not available	NO	1	-	NO	-	NO	YES	126.58	3.42	25	N.A.	N.A.	374	25	457	25		2	3	4	Spain	River	58	> 100	97			78	97	78	F	0.078
Chlorotoluenes	3,4-Dichlorotoluene	95-75-0	Not available	NO	1	-	NO	-	NO	YES	161.03	4	(Computed by XLogP3 3.0 release 2021.10.14) 25	N.A.	N.A.	N.A.	N.A.	N.A.	N.A.		2	3	4	Spain	River	58					2.91	97	2.91	F	0.00291
Chlorotoluenes	4-Chlorotoluene	106-43-4	Not available	NO	1	-	NO	-	NO	YES	126.58	3.33	26	N.A.	N.A.	136	26	359	26		2	3	4	Spain	River	58							N.A.
Dioxin ( Halogenated Polyaromatics)	Octachlorodibenzo-p-dioxin	3268-87-9	POP	YES	8	-	NO	POP	YES	NO	459.7	8.2	25	N.A.	N.A.	4e-07	25	1.1e-10	25		2	3		Germany	Clothes	59							N.A.
Dioxin ( Halogenated Polyaromatics)	Octachlorodibenzofuran	39001-02-0	POP	YES	8	-	NO	POP	YES	NO	443.7	7.98	25	N.A.	N.A.	N.A.	N.A.	N.A.	N.A.		2	3		Germany	Clothes	59							N.A.
Dioxins/Furans ( Halogenated Polyaromatics)	Octachlorodibenzo-p-dioxin	3268-87-9	POP	YES	8	-	NO	POP	YES	NO	459.7	8.2	25	N.A.	N.A.	4e-07	25	1.1e-10	25		2	3		Germany	Clothes	59							N.A.
Dioxins/Furans ( Halogenated Polyaromatics)	Octachlorodibenzofuran	39001-02-0	POP	YES	8	-	NO	POP	YES	NO	443.7	7.98	25	N.A.	N.A.	N.A.	N.A.	N.A.	N.A.		2	3		Germany	Clothes	59; 60							N.A.
Dioxins/Furans ( Halogenated Polyaromatics)	2,3,7,8-tetrachlorodibenzo-p-dioxin (TCDD)	1746-01-6	POP	YES	8	-	NO	POP	YES	NO	322	6.8	25	N.A.	N.A.	0.0002	25	8.53261e-08	25		2	3		Germany	Clothes	60					8.1e-06	97	8.1e-06	F	8.1e-09
Dioxins/Furans ( Halogenated Polyaromatics)	1,2,3,7,8-PENTACHLORODIBENZO-P-DIOXIN (PeCDD)	40321-76-4	POP	YES	8	-	NO	POP	YES	NO	356.4	6.6	25	N.A.	N.A.	N.A.	N.A.	N.A.	N.A.		2	3		Germany	Clothes	60					2.7e-05	97	2.7e-05	F	2.7e-08
Dioxins/Furans ( Halogenated Polyaromatics)	1,2,3,6,7,8-Hexachlorodibenzo-P-dioxin	57653-85-7	POP	YES	8	-	NO	POP	YES	NO	390.9	8.21	25	N.A.	N.A.	N.A.	N.A.	N.A.	N.A.		2	3		Germany	Clothes	60							N.A.
Dioxins/Furans ( Halogenated Polyaromatics)	1,2,3,4,7,8-HEXACHLORODIBENZO-P-DIOXIN	39227-28-6	POP	YES	8	-	NO	POP	YES	NO	390.9	8.4	25	N.A.	N.A.	N.A.	N.A.	N.A.	N.A.		2	3		Germany	Clothes	60					0.0029	97	0.0029	F	2.9e-06
Dioxins/Furans ( Halogenated Polyaromatics)	1,2,3,4,6,7,8-Heptachlorodibenzo-P-dioxin	35822-46-9	POP	YES	8	-	NO	POP	YES	NO	425.2	8.2	28	N.A.	N.A.	0.0019	28	7.5e-10	28		2	3		Germany	Clothes	60							N.A.
Dioxins/Furans ( Halogenated Polyaromatics)	1,2,3,4,6,7,9-Heptachlorodibenzo-P-dioxin	58200-70-7	POP	YES	8	-	NO	POP	YES	NO	425.3	7.5	25	N.A.	N.A.	N.A.	N.A.	N.A.	N.A.		2	3		Germany	Clothes	60							N.A.
Dioxins/Furans ( Halogenated Polyaromatics)	2,3,7,8-Tetrachlorodibenzofuran	51207-31-9	POP	YES	8	-	NO	POP	YES	NO	306	6.53	25	N.A.	N.A.	0.000692	28	0.000203983	28		2	3		Germany	Clothes	60					1.6e-05	97	1.6e-05	F	1.6e-08
Dioxins/Furans ( Halogenated Polyaromatics)	1,2,3,7,8-Pentachlorodibenzofuran	57117-41-6	POP	YES	8	-	NO	POP	YES	NO	340.4	6.9	(Computed by XLogP3 3.0 release 2021.10.14) 25	N.A.	N.A.	N.A.	N.A.	N.A.	N.A.		2	3		Germany	Clothes	60							N.A.
Dioxins/Furans ( Halogenated Polyaromatics)	1,2,3,4,8-Pentachlorodibenzofuran	67517-48-0	POP	YES	8	-	NO	POP	YES	NO	340.4	6.4	(Computed by XLogP3 3.0 release 2021.10.14) 25	N.A.	N.A.	N.A.	N.A.	N.A.	N.A.		2	3		Germany	Clothes	60							N.A.
Dioxins/Furans ( Halogenated Polyaromatics)	1,2,3,4,7,8-Hexachlorodibenzofuran	70648-26-9	POP	YES	8	-	NO	POP	YES	NO	374.87	7.7	28	N.A.	N.A.	8.25e-06	28	3.2e-08	28		2	3		Germany	Clothes	60							N.A.
Dioxins/Furans ( Halogenated Polyaromatics)	1,2,3,4,7,9-Hexachlorodibenzofuran	91538-84-0	POP	YES	8	-	NO	POP	YES	NO	374.9	7.1	(Computed by XLogP3 3.0 release 2021.10.14) 25	N.A.	N.A.	N.A.	N.A.	N.A.	N.A.		2	3		Germany	Clothes	60							N.A.
Dioxins/Furans ( Halogenated Polyaromatics)	1,2,3,6,7,8-Hexachlorodibenzofuran	57117-44-9	POP	YES	8	-	NO	POP	YES	NO	374.9	6.9	(Computed by XLogP3 3.0 release 2021.10.14) 25	N.A.	N.A.	3.61e-06	28	3.5e-08	28		2	3		Germany	Clothes	60							N.A.
Dioxins/Furans ( Halogenated Polyaromatics)	1,2,3,7,8,9-Hexachlorodibenzofuran	72918-21-9	POP	YES	8	-	NO	POP	YES	NO	374.9	7.4	(Computed by XLogP3 3.0 release 2021.10.14) 25	N.A.	N.A.	N.A.	N.A.	N.A.	N.A.		2	3		Germany	Clothes	60							N.A.
Dioxins/Furans ( Halogenated Polyaromatics)	2,3,4,6,7,8-Hexachlorodibenzofuran	60851-34-5	POP	YES	8	-	NO	POP	YES	NO	374.9	7.1	(Computed by XLogP3 3.0 release 2021.10.14) 25	N.A.	N.A.	N.A.	N.A.	N.A.	N.A.		2	3		Germany	Clothes	60							N.A.
Dioxins/Furans ( Halogenated Polyaromatics)	1,2,3,4,6,7,8-Heptachlorodibenzofuran	67562-39-4	POP	YES	8	-	NO	POP	YES	NO	409.3	7.9	(Computed by XLogP3 3.0 release 2021.10.14) 25	N.A.	N.A.	N.A.	N.A.	N.A.	N.A.		2	3		Germany	Clothes	60							N.A.
Dioxins/Furans ( Halogenated Polyaromatics)	1,2,3,4,7,8,9-Heptachlorodibenzofuran	55673-89-7	POP	YES	8	-	NO	POP	YES	NO	409.3	7.5	(Computed by XLogP3 3.0 release 2021.10.14) 25	N.A.	N.A.	N.A.	N.A.	N.A.	N.A.		2	3		Germany	Clothes	60							N.A.
Dioxins/Furans ( Halogenated Polyaromatics)	1,2,3,4,6,7,9-Heptachlorodibenzofuran	70648-25-8	POP	YES	8	-	NO	POP	YES	NO	409.3	7.6	(Computed by XLogP3 3.0 release 2021.10.14) 25	N.A.	N.A.	N.A.	N.A.	N.A.	N.A.		2	3		Germany	Clothes	60							N.A.
Dioxins/Furans ( Halogenated Polyaromatics)	1,2,3,4,6,8,9-Heptachlorodibenzofuran	69698-58-4	POP	YES	8	-	NO	POP	YES	NO	409.3	7.6	(Computed by XLogP3 3.0 release 2021.10.14) 25	N.A.	N.A.	N.A.	N.A.	N.A.	N.A.		2	3		Germany	Clothes	60							N.A.
Dyes	4-aminoazobenzene (AAB)	60-09-3	SVHC and Annex XVII appendix 2 Carcinogen (Category 2)	YES	3; 4	-	NO	-	NO	YES	197.24	3.41	25	2.82	25	32	25	0.000187	25		2	3		China	Textile WWTPs (sludge)	48					1.7	97	1.7	F	0.0017
Dyes	o-aminoazotoluene (OAAT)	97-56-3	SVHC and Annex XVII appendix 2 Carcinogen (Category 2)	YES	3; 4	-	NO	-	NO	YES	225.29	4.29	25	N.A.	N.A.	2.59	26	9.99e-05	25		2	3		China	Textile WWTPs (sludge)	48							N.A.
Dyes	Disperse blue 14 (Anthraquinone Dyes)	2475-44-7	Not available	NO	1	-	NO	-	NO	NO	266.29	4.25	26	N.A.	N.A.	0.346	26	2.67e-09	26		2	3		Germany	Textile effluents	40							N.A.
Dyes	Disperse Blue 291 (Azo Dyes)	56548-64-2	Not available	NO	1	-	NO	-	NO	NO	509.3	4.1	(Computed by XLogP3 3.0 release 2021.10.14) 25	N.A.	N.A.	N.A.	N.A.	N.A.	N.A.		2	3		Brazil	River; WWTP receiving textile wastewater	61							N.A.
Dyes	Disperse blue 3 (Anthraquinone Dyes)	2475-46-9	Not available	NO	1	-	NO	-	NO	YES	296.32	3.28	26	N.A.	N.A.	1.58	26	1.41e-09	26		2	3		Germany	Textile effluents	40					1	97	1	F	0.001
Dyes	Disperse Blue 373 (Azo Dyes)	51868-46-3	Not available	NO	1	-	NO	-	NO	NO	533.3	4.6	(Computed by XLogP3 3.0 release 2021.10.14) 25	N.A.	N.A.	N.A.	N.A.	N.A.	N.A.		2	3		Brazil	River; WWTP receiving textile wastewater; Textile effluents	61-63							N.A.
Dyes	Disperse Orange 30 (Azo Dyes)	5261-31-4	Not available	NO	1	-	NO	-	NO	NO	450.3	5.52	26	N.A.	N.A.	0.00578	26	5.39e-10	26		2	3		Brazil	River; WWTP receiving textile wastewater	61							N.A.
Dyes	Disperse Orange 37 (Azo Dyes)	13301-61-6	Not available	NO	1	-	NO	-	NO	YES	392.2	5.98	26	N.A.	N.A.	0.0054	26	1.87e-08	26		2	3		Brazil	Textile effluents; River	62							N.A.
Dyes	Disperse Red 1 (Azo Dyes)	2872-52-8	Not available	NO	1	-	NO	-	NO	YES	314.34	4.3	26	N.A.	N.A.	0.796	26	5.33e-12	26		2	3		Brazil	River; WWTP receiving textile wastewater	61; 63							N.A.
Dyes	Disperse violet 1 (Anthraquinone Dyes)	128-95-0	Not available	NO	1	-	NO	-	NO	NO	238.24	3	26	N.A.	N.A.	5.84	26	2.67e-08	26		2	3		Germany	Textile effluents	40							N.A.
Dyes	Disperse Violet 93 (Azo Dyes)	52697-38-8	Not available	NO	1	-	NO	-	NO	NO	479.3	5.88	26	N.A.	N.A.	0.00341	26	6.28e-12	26		2	3		Brazil	River; WWTP receiving textile wastewater; Textile effluents	61-63							N.A.
Dyes	Disperse Yellow 3 ( Azo Dyes)	2832-40-8	Not available	NO	1	-	NO	-	NO	YES	269.3	3.98	26	N.A.	N.A.	10.3	26	6.67e-09	26		2	3		Brazil	River; WWTP receiving textile wastewater	61					> 180	97	180	F	0.18
Epoxides	2-Isopropyl-3-vinyloxirane	59231-16-2	Not available	NO	1	-	NO	-	NO	NO	112.172	2.05	26	N.A.	N.A.	1890	26	4220	26	N.A.	N.A.	N.A.	N.A.	Morocco	Textile effluents	35							N.A.
Epoxides	Oxirane, (1-methylbutyl)-	53229-39-3	Not available	NO	1	-	NO	-	NO	NO	114.19	2.26	26	N.A.	N.A.	1230	26	2960	26	N.A.	N.A.	N.A.	N.A.	Morocco	Textile effluents	35							N.A.
Esters	Diethyl succinate/butanedioic acid, diethyl ester	123-25-1	Not available	NO	1	-	NO	-	NO	NO	174.19	1.2	25	N.A.	N.A.	19.1	25	19.6	26		2			Morocco	Textile effluents	35					140	97	140	F	0.14
Esters	Ethyl 2-methylbutyrate /butanoic acid, 2-methyl-, ethyl ester	7452-79-1	Not available	NO	1	-	NO	-	NO	NO	130.18	2.26	26	N.A.	N.A.	1070	26	1070	26		2			Morocco	Textile effluents	35							N.A.
Esters	(E,E)- 9,12-Octadecadienoic acid, methyl ester	2462-85-3	Not available	NO	1	-	NO	-	NO	NO	294.5	6.82	26	N.A.	N.A.	0.0198	26	0.0126	26	N.A.	N.A.	N.A.	N.A.	China	River	34							N.A.
Esters	(E,E)-9,11-octadecadienoicacid,methyl ester	13058-52-1	Not available	NO	1	-	NO	-	NO	NO	294.5	7.8	26	N.A.	N.A.	0.00288	26	0.00467	26	1	2	3	4	China	Textile WWTPs; River	34							N.A.
Esters	1,1-Ethanediol, diacetate	542-10-9	Not available	NO	1	-	NO	-	NO	NO	146.14	0.33	26	N.A.	N.A.	41100	26	219	26	N.A.	N.A.	N.A.	N.A.	Morocco	Textile effluents	35							N.A.
Esters	1-Butanol, 3-methyl-, acetate	123-92-2	Not available	NO	1	-	NO	-	NO	NO	130.18	2.25	25	N.A.	N.A.	2000	25	747	25	1				Morocco	Textile effluents	35					36	97	36	F	0.036
Esters	2-(4-Methoxyphenyl)-4,6-dioxocyclohexane-1,3-dicarboxylic acid diethyl ester	109396-02-3	Not available	NO	1	-	NO	-	NO	NO	362.379	N.A.	N.A.	N.A.	N.A.	N.A.	N.A.	N.A.	N.A.	N.A.	N.A.	N.A.	N.A.	Morocco	Textile effluents	35							N.A.
Esters	2-(Acetomethyl)-1- butene	55670-09-2	Not available	NO	1	-	NO	-	NO	NO	128.169	2.26	26	N.A.	N.A.	1100	26	823	26	N.A.	N.A.	N.A.	N.A.	Morocco	Textile effluents	35							N.A.
Esters	2,3-Butane diol-diacetate	1114-92-7	Not available	NO	1	-	NO	-	NO	NO	174.19	1.24	26	N.A.	N.A.	5130	26	311	26	N.A.	N.A.	N.A.	N.A.	Morocco	Textile effluents	35							N.A.
Esters	4-Nitrobenzylidene malonic acid, diethyl ester	22399-00-4	Not available	NO	1	-	NO	-	NO	NO	293	3.03	26	N.A.	N.A.	14.1	26	0.00109	26	N.A.	N.A.	N.A.	N.A.	Morocco	Textile effluents	35							N.A.
Esters	Acetic acid, 1-methyl ester	79-20-9	Not available	NO	1	-	NO	-	NO	NO	74.08	0.18	26	N.A.	N.A.	93900	26	7030	26	1				Morocco	Textile effluents	35					320	97	320	F	0.32
Esters	Acetic acid, 1-methylethyl ester	108-21-4	Not available	NO	1	-	NO	-	NO	NO	102.13	1.02	25	N.A.	N.A.	29000	25	8040	25	1				Morocco	Textile effluents	35					265	97	265	F	0.265
Esters	Acetic acid, ethoxy-, ethyl ester	817-95-8	Not available	NO	1	-	NO	-	NO	NO	132.16	0.59	26	N.A.	N.A.	28300	26	368	26	N.A.	N.A.	N.A.	N.A.	Morocco	Textile effluents	35							N.A.
Esters	Cyanic acid, phenyl ester	1122-85-6	Not available	NO	1	-	NO	-	NO	NO	119.12	0.6	26	N.A.	N.A.	16700	26	10.1	26	1	2	3		China	Textile WWTPs; River	34							N.A.
Esters	Ditrimethylolpropane tetraacrylate	94108-97-1	Not available	NO	1	-	NO	-	NO	NO	466.5	4.34	26	N.A.	N.A.	0.232	26	2.84e-06	26		2	3	4	Croatia	River	47							N.A.
Esters	Docosanoic acid, 2-hydroxy-, methyl ester	13980-17-1	Not available	NO	1	-	NO	-	NO	NO	370.6	8.66	26	N.A.	N.A.	0.000608	26	1.95e-07	26	N.A.	N.A.	N.A.	N.A.	Morocco	Textile effluents	35							N.A.
Esters	Ethyl -3-acetoxybutyrate	27846-49-7	Not available	NO	1	-	NO	-	NO	NO	174.19	1.31	26	N.A.	N.A.	4440	26	168	26	N.A.	N.A.	N.A.	N.A.	Morocco	Textile effluents	35							N.A.
Esters	Formic acid, ethyl ester	109-94-4	Not available	NO	1	-	NO	-	NO	NO	74.08	0.23	26	N.A.	N.A.	85100	26	32700	26	1	2	3		Morocco	Textile effluents	35							N.A.
Esters	Methanol, oxo-, benzoate	78823-32-2	Not available	NO	1	-	NO	-	NO	NO	150.134	0.33	26	N.A.	N.A.	39600	26	147	26	N.A.	N.A.	N.A.	N.A.	Morocco	Textile effluents	35							N.A.
Esters	Oxalic acid, ethyl propyl ester	26404-25-1	Not available	NO	1	-	NO	-	NO	NO	160.17	0.9	26	N.A.	N.A.	22500	26	252	26	N.A.	N.A.	N.A.	N.A.	Morocco	Textile effluents	35							N.A.
Esters	Pentadecanoic acid,2,6,10,14-tetramethyl-, methyl ester	1001-80-5	Not available	NO	1	-	NO	-	NO	NO	312.5	8.43	26	N.A.	N.A.	0.000293	26	0.0877	26	N.A.	N.A.	N.A.	N.A.	Morocco	Textile effluents	35							N.A.
Esters	Phenol,4-[2-[2-(chloromethyl)-1,3-dioxolan-2-yl]ethyl]-, acetate	55255-66-8	Not available	NO	1	-	NO	-	NO	NO	284.73	3.33	26	N.A.	N.A.	22.1	26	0.000847	26	N.A.	N.A.	N.A.	N.A.	Morocco	Textile effluents	35							N.A.
Esters	Phenyl benzoate	93-99-2	Not available	NO	1	-	NO	-	NO	NO	198.22	3.59	26	N.A.	N.A.	38.4	26	0.0455	26	1	2		4	Portugal	Textile WWTPs	56							N.A.
Esters	Propane dioic acid (3chlorophenyl) methylene, diethyl ester;	670748-74-0	Not available	NO	1	-	NO	-	NO	NO	256.68	2.68	26	N.A.	N.A.	111	26	0.296	26	1				Moroco	Textile effluents	35							N.A.
Esters	Propane dioic acid, [(4methoxyphenyl) methylene]-, diethyl ester	6768-23-6	Not available	NO	1	-	NO	-	NO	NO	278.3	3.28	26	N.A.	N.A.	25.9	26	0.0324	26	N.A.	N.A.	N.A.	N.A.	Morocco	Textile effluents	35							N.A.
Esters	Propanedioic acid, (3chlorophenyl) methylene, diethyl ester	6768-21-4	Not available	NO	1	-	NO	-	NO	NO	283	3.49	26	N.A.	N.A.	16.2	26	0.0389	26	N.A.	N.A.	N.A.	N.A.	Morocco	Textile effluents	35							N.A.
Esters	Propanedioic acid, (phenylmethylene)-, diethyl ester	5292-53-5	Not available	NO	1	-	NO	-	NO	NO	248.27	3.13	26	N.A.	N.A.	51.3	26	0.117	26	N.A.	N.A.	N.A.	N.A.	Morocco	Textile effluents	35							N.A.
Esters	Propanoic acid, ethyl ester	105-37-3	Not available	NO	1	-	NO	-	NO	NO	102.13	1.21	25	N.A.	N.A.	3840	26	4770	25	1				Morocco	Textile effluents	35			44	97	56	97	44	D	0.044
Esters	Tributyl-O-acetyl citrate	77-90-7	Not available	NO	1	-	NO	-	NO	NO	402.5	4.92	25	N.A.	N.A.	1.7	25	0.000607	25				4	Portugal	Textile WWTPs	56							N.A.
Esters	Triethyl citrate	77-93-0	Not available	NO	1	-	NO	-	NO	NO	276.28	0.33	26	N.A.	N.A.	28200	26	0.0916	26	1	2	3	4	China	River	34							N.A.
Ethers	2-pentoxy-tetrahydropyran	32767-70-7	Not available	NO	1	-	NO	-	NO	NO	172.268	3.06	26	N.A.	N.A.	147	26	26	26	N.A.	N.A.	N.A.	N.A.	Morocco	Textile effluents	35							N.A.
Ethers	2-propyltetrahydropyran	3208-22-8	Not available	NO	1	-	NO	-	NO	NO	114.188	2.34	26	N.A.	N.A.	4620	26	1360	26	N.A.	N.A.	N.A.	N.A.	Morocco	Textile effluents	35							N.A.
Ethers	Alcohol ethoxylate C10EO5 (Poly(oxy-1,2-ethanediyl), .alpha.-tridecyl-.omega.-hydroxy-,branched, C10E05-20, C10EO2-5)	69011-36-5	Not available	NO	1	-	NO	-	NO	NO	N.A.	N.A.	N.A.	N.A.	N.A.	N.A.	N.A.	N.A.	N.A.	1	2	3	4	Portugal; Spain	Textile WWTPs	64							N.A.
Ethers	Benzene, (1,2-dimethoxyethyl)-	4013-37-0	Not available	NO	1	-	NO	-	NO	NO	166.22	1.43	26	N.A.	N.A.	3870	26	17.7	26	1			4	Morocco	Textile effluents	35							N.A.
Ethers	Benzene, (1-ethoxy-3-butenyl)-	54703-48-9	Not available	NO	1	-	NO	-	NO	NO	176.25	3.53	26	N.A.	N.A.	55.6	26	7.52	26	N.A.	N.A.	N.A.	N.A.	Morocco	Textile effluents	35							N.A.
Ethers	Hexaethyleneglycol dimethylether	1072-40-8	Not available	NO	1	-	NO	-	NO	NO	310.38	-1.58	26	N.A.	N.A.	238000	26	0.00557	26		2	3	4	Croatia	River	47							N.A.
Ethers	Poly(ethylene glycol) (PEG)	25322-68-3	Not available	NO	1	-	NO	-	NO	NO	N.A.	N.A.	N.A.	N.A.	N.A.	N.A.	N.A.	N.A.	N.A.	1	2	3	4	Portugal; Spain	Textile WWTPs	64					>1000	97	1000	F	1
Ethers	Undecaethylene glycol mPEG 11OH	114740-40-8	Not available	NO	1	-	NO	-	NO	NO	516.6	-2.1	(Computed by XLogP3 3.0 release 2021.10.14) 25	N.A.	N.A.	N.A.	N.A.	N.A.	N.A.	N.A.	N.A.	N.A.	N.A.	China	Textile effluents	36							N.A.
Heterocyclic compounds	1-(4-Chlorophenyl)-3-(3,4-dichlorophenyl)urea	120-20-2	Not available	NO	1	-	NO	-	NO	NO	315.6	4.34	26	12.7	26	0.11	(at 20°C) 26	N.A.	N.A.	1			4	China; Chile; Portugal; Albany; USA; Japan; Korea	Clothes	53							N.A.
Heterocyclic compounds	1-H-benzotriazole (B-Tri)	95-14-7	Not available	NO	1	CoRAP - Need for follow-up regulatory action at EU level, identification as SVHC and CLH	YES	-	NO	NO	119.12	1.44	25	8.37	25	19800	25	0.00328	25				4	Sweden	Clothes	65			102	97	65	97	65	F	0.065
Heterocyclic compounds	2-(2H-benzotriazol-2-yl)-4,6-bis(1-methyl-1-phenylethyl)phenol (UV234)	70321-86-7	Not available	NO	1	-	NO	-	NO	NO	447.6	7.67	26	N.A.	N.A.	0.00165	26	0.0217	26				4	Sweden	Clothes	44; 65							N.A.
Heterocyclic compounds	2-(2H-benzotriazol-2-yl)-4,6-di-tert-pentylphenol (UV 328)	25973-55-1	Annex XIV and SVHC candidate as PBT, vPvB and POP	YES	4; 8; 9	-	NO	POP	YES	YES	351.5	7.25	26	N.A.	N.A.	0.0148	26	2.57e-08	26				4	Sweden	Clothes	65							N.A.
Heterocyclic compounds	2,2′-Dithiobisbenzothiazole (MBTS)	120-78-5	Not available	NO	1	-	NO	-	NO	NO	332.5	4.66	26	N.A.	N.A.	0.0644	26	8.28e-08	26				4	Sweden	Clothes	65							N.A.
Heterocyclic compounds	2-Mercaptobenzothiazole MBT	149-30-4	Not available	NO	1	CoRAP Need for restrictions and for other Community-wide measures	YES	-	NO	NO	167.3	2.41	25	N.A.	N.A.	1740	25	0.000253	25	N.A.	N.A.	N.A.	N.A.	Sweden	Clothes	44			4.1	97	0.42	97	0.42	F	0.00042
Heterocyclic compounds	5-methyl-benzotriazole (5-Ttri)	136-85-6	Not available	NO	1	-	NO	-	NO	NO	133.15	1.71	26	N.A.	N.A.	3070	26	0.0419	26				4	Sweden	Clothes	65			79	97	22	97	22	F	0.022
Heterocyclic compounds	Benzothiazoles	95-16-9	Not available	NO	1	-	NO	-	NO	NO	135.19	2.17	26	N.A.	N.A.	1680	26	9.89	26				4	Sweden	Clothes	44; 65					64	97	64	F	0.064
Heterocyclic compounds	Methylbenzotriazole	29878-31-7	Not available	NO	1	-	NO	-	NO	NO	133.15	1.4	(Computed by XLogP3 3.0 release 2021.10.14) 25	N.A.	N.A.	N.A.	N.A.	N.A.	N.A.	N.A.	N.A.	N.A.	N.A.	Sweden	Clothes	44			118	97	63	97	63	F	0.063
Heterocyclic compounds	2,3 Benzoquinoline /Acridine	260-94-6	Not available	NO	1	-	NO	-	NO	NO	179.22	3.4	26	N.A.	N.A.	5.38	26	0.018	26		2	3		Sweden	Clothes	44	0.41	97	2.05	97	3	97	0.41	A	0.00041
Heterocyclic compounds	(5-Chloro-3-cyano-4,6-dimethyl-pyridin-2-ylsulfanyl)-acetic acid methyl ester	442655-60-9	Not available	NO	1	-	NO	-	NO	NO	284.76	3.18	26	N.A.	N.A.	15.8	26	0.000148	26	N.A.	N.A.	N.A.	N.A.	Morocco	Textile effluents	35							N.A.
Heterocyclic compounds	1,3,5-Triazine-2,4,6-triamine	108-78-1	Not available	NO	1	-	NO	-	NO	NO	126.12	-1.37	26	N.A.	N.A.	1000000	26	4.79e-08	26		2	3		China; USA	River; Clothes	34; 66							N.A.
Heterocyclic compounds	4,6-Diamino-1,3,5-triazin-2-ol	645-92-1	Not available	NO	1	-	NO	-	NO	NO	127.11	-1.8	26	N.A.	N.A.	N.A.	N.A.	N.A.	N.A.		2	3		USA	Clothes	66							N.A.
Heterocyclic compounds	6-amino-2,4-dihydroxy-1,3,5-triazine	645-93-2	Not available	NO	1	-	NO	-	NO	NO	128.09	-1.5	26	N.A.	N.A.	N.A.	N.A.	N.A.	N.A.		2	3		USA	Clothes	66							N.A.
Heterocyclic compounds	1,3,5-Triazine-2,4,6-triol	180-80-5	Not available	NO	1	-	NO	-	NO	NO	129.07	-1.2	26	6.88; 11.40; 13.5	26	N.A.	N.A.	4e-06			2	3		USA	Clothes	66							N.A.
Heterocyclic compounds	1H-Pyrrole-2,5-dione, 3-ethyl-4-methyl-	20189-42-8	Not available	NO	1	-	NO	-	NO	NO	139.15	1.46	26	N.A.	N.A.	4770	26	3.92e-05	26		2	3		China	River	34							N.A.
Heterocyclic compounds	1-Methyl-2,6-diphenyl-4,4-tetramethylene-1,4-dihydropyridine-3,5-dicarbonitrile	83078-30-2	Not available	NO	1	-	NO	-	NO	NO	351.444	5.18	26	N.A.	N.A.	0.125	26	8.23e-09	26	N.A.	N.A.	N.A.	N.A.	Morocco	Textile effluents	35							N.A.
Heterocyclic compounds	2-(2-Thienyl)-1,4-dihydroquinazolin-4-one	26059-85-8	Not available	NO	1	-	NO	-	NO	NO	228.274	2.76	26	N.A.	N.A.	135	26	1.41e-05	26	N.A.	N.A.	N.A.	N.A.	China	Textile WWTPs	36							N.A.
Heterocyclic compounds	2,2'-[oxybis(methylene)]bis- furan	4437-22-3	Not available	NO	1	-	NO	-	NO	NO	178.18	2.22	26	N.A.	N.A.	711	26	3.03	26	N.A.	N.A.	N.A.	N.A.	China	Textile WWTPs; River	34							N.A.
Heterocyclic compounds	2,4-diamine-1,3,5-triazine	504-08-5	Not available	NO	1	-	NO	-	NO	NO	111.11	-0.32	26	N.A.	N.A.	203000	26	0.195	26	1	2	3	4	China	Textile WWTPs; River	34							N.A.
Heterocyclic compounds	2-amino-4-hydroxy-6-p-cyanophenylpropylpteridine	3545-84-4	Not available	NO	1	-	NO	-	NO	NO	355.14	-3.22	26	N.A.	N.A.	1000000	26	2.75e-09	26		2	3		Morocco	Textile effluents	35							N.A.
Heterocyclic compounds	2-Amino-4-hydroxy-6-p-cyanophenylpropylpteridine	31419-63-3	Not available	NO	1	-	NO	-	NO	NO	306.327	1.418	-	N.A.	N.A.	N.A.	N.A.	N.A.	N.A.	N.A.	N.A.	N.A.	N.A.	Morocco	Textile effluents	35							N.A.
Heterocyclic compounds	3-(1-methylpyrrolidin-2-yl)pyridine (Nicotine)	22083-74-5	Not available	NO	1	-	NO	-	NO	NO	162.23	1.17	26	N.A.	N.A.	1000000	26	4.27	26	N.A.	N.A.	N.A.	N.A.	China	Textile WWTPs; River	34							N.A.
Heterocyclic compounds	4-Methylindoline	62108-16-1	Not available	NO	1	-	NO	-	NO	NO	133.19	2.61	26	N.A.	N.A.	532	26	5.99	26				4	China	Textile WWTPs; River	34							N.A.
Heterocyclic compounds	7-(Diethylamino)-4-methyl- 2H-1-benzopyran-2-one	91-44-1	Not available	NO	1	-	NO	-	NO	NO	231.29	3.22	26	N.A.	N.A.	53.3	26	25700000	26	1	2	3		Portugal	Textile WWTPs	56					1.38	97	1.38	F	0.00138
Heterocyclic compounds	Acetamide, N-benzyl-2-(2,3-dihydro-2-methyl-5-phenyl-1,3,4-thiadiazol-2-yl)	361990-88-7	Not available	NO	1	-	NO	-	NO	NO	325	N.A.	N.A.	N.A.	N.A.	N.A.	N.A.	N.A.	N.A.	N.A.	N.A.	N.A.	N.A.	Morocco	Textile effluents	35							N.A.
Heterocyclic compounds	Benzofuran-3-carboxylic acid, 5-methoxy-2-(1-piperidylmethyl)-, ethyl ester	380842-50-2	Not available	NO	1	-	NO	-	NO	NO	317.379	4.06	26	N.A.	N.A.	33.7	26	2.08e-05	26	N.A.	N.A.	N.A.	N.A.	Morocco	Textile effluents	35							N.A.
Heterocyclic compounds	Bioresmethrin	28434-01-7	Not available	NO	1	-	NO	-	NO	NO	6.14	4.79	26	N.A.	N.A.	0.0415	26	0.0187	26	1		3	4	China	Textile WWTPs; River	34					0.00062	97	0.00062	F	6.2e-07
Heterocyclic compounds	Hexamethoxymethyl melamine	3089-11-0	Not available	NO	1	-	NO	-	NO	NO	390.44	1.61	26	N.A.	N.A.	149	26	1.41e-06	26				4	China	Textile effluents	36							N.A.
Heterocyclic compounds	Hexamine	100-97-0	Not available	NO	1	-	NO	-	NO	NO	140.19	-4.15	26	N.A.	N.A.	1000000	26	0.533	26				4	Portugal	Textile WWTPs	56					49800	97	49800	F	49.8
Heterocyclic compounds	Kynurenic acid	492-27-3	Not available	NO	1	-	NO	-	NO	NO	189.17	0.6	26	N.A.	N.A.	37600	26	0.000253	26	N.A.	N.A.	N.A.	N.A.	China	Textile effluents	36							N.A.
Heterocyclic compounds	Pholcodine	509-67-1	Not available	NO	1	-	NO	-	NO	NO	398.5	1.08	25	9.3	25	10100	26	5.53e-09	26	N.A.	N.A.	N.A.	N.A.	China	Textile effluents	36							N.A.
Heterocyclic compounds	Phthalimide dioxime	4741-70-2	Not available	NO	1	-	NO	-	NO	NO	177.16	0.25	26	N.A.	N.A.	34500	26	3.51e-06	26	1	2	3	4	Moroco	Textile effluents	35							N.A.
Heterocyclic compounds	1,3,5-tris-(2,3-dibromopropyl)- 1,3,5-triazine-2,4,6-trione (TDBP-TAZTO)	52434-90-9	Not available	NO	1	-	NO	-	NO	NO	728.7	4.1	(Computed by XLogP3 3.0 release 2021.10.14) 25	N.A.	N.A.	N.A.	N.A.	N.A.	N.A.				4	Japan	Textile effluents	67							N.A.
Hydrocarbons	1,3,7-Octatriene, 3,7-dimethyl-	502-99-8	Not available	NO	1	-	NO	-	NO	NO	136.23	4.17	26	N.A.	N.A.	6.29	26	268	26	N.A.	N.A.	N.A.	N.A.	Morocco	Textile effluents	35							N.A.
Hydrocarbons	1,5-Decadiyne	53963-03-4	Not available	NO	1	-	NO	-	NO	NO	134.22	3.77	26	N.A.	N.A.	15.6	26	126	26	N.A.	N.A.	N.A.	N.A.	Morocco	Textile effluents	35							N.A.
Hydrocarbons	2,2-dimethylbutane	75-83-2	Not available	NO	1	-	NO	-	NO	NO	86.18	3.82	26	N.A.	N.A.	20.2	26	42500	26	1				Morocco	Textile effluents	35							N.A.
Hydrocarbons	2,3-Dimethyldecane	17312-44-6	Not available	NO	1	-	NO	-	NO	NO	170.33	6.09	26	N.A.	N.A.	0.113	26	165	26	N.A.	N.A.	N.A.	N.A.	Morocco	Textile effluents	35							N.A.
Hydrocarbons	2-Propyltoluene/benzene, 1-methyl-2-propyl	1074-17-5	Not available	NO	1	-	NO	-	NO	NO	134.22	4.5	26	N.A.	N.A.	12.7	26	133	26	N.A.	N.A.	N.A.	N.A.	Morocco	Textile effluents	35							N.A.
Hydrocarbons	3,7,11,15-Tetramethylhexadeca-1,3,6,10,14-pentaene	77898-98-7	Not available	NO	1	-	NO	-	NO	NO	272.5	8	(Computed by XLogP3 3.0 release 2019.06.18) 25	N.A.	N.A.	N.A.	N.A.	N.A.	N.A.	N.A.	N.A.	N.A.	N.A.	Morocco	Textile effluents	35							N.A.
Hydrocarbons	4-Ethyl-2,2,6,6- tetramethylheptane	62108-31-0	Not available	NO	1	-	NO	-	NO	NO	184.36	6.43	26	N.A.	N.A.	0.0491	26	242	26	N.A.	N.A.	N.A.	N.A.	Portugal	Textile WWTPs	56							N.A.
Hydrocarbons	7,11,15-Trimethyl-3-methylene-hexadeca-1,6,10,14-tetraene	70901-63-2	Not available	NO	1	-	NO	-	NO	NO	272.5	9.47	26	N.A.	N.A.	0.00201	26	0.103	26	N.A.	N.A.	N.A.	N.A.	Morocco	Textile effluents	35							N.A.
Hydrocarbons	Benzene, 1-methyl-2-(1-methylethyl)-	527-84-4	Not available	NO	1	-	NO	-	NO	NO	134.22	4.38	26	N.A.	N.A.	16.1	26	141	26	N.A.	N.A.	N.A.	N.A.	Morocco	Textile effluents	35							N.A.
Hydrocarbons	Cyclobutene, 2-propenylidene-	52097-85-5	Not available	NO	1	-	NO	-	NO	NO	92.14	3.16	26	N.A.	N.A.	72	26	3240	26	N.A.	N.A.	N.A.	N.A.	Morocco	Textile effluents	35							N.A.
Hydrocarbons	Cyclohexane	110-82-7	Annex XVII	YES	6	-	NO	-	NO	NO	84.16	3.44	25	N.A.	N.A.	55	25	12900	25	1				Morocco	Textile effluents	35			>400	97	4.53	97	4.53	F	0.00453
Hydrocarbons	Docosane	629-97-0	Not available	NO	1	-	NO	-	NO	NO	310.6	11.15	25	N.A.	N.A.	7.77e-07	25	0.000171	25				4	Portugal	Textile WWTPs	56			>530	97	>530	97	530	D-F	0.53
Hydrocarbons	Dotriacontane	544-85-4	Not available	NO	1	-	NO	-	NO	NO	450.9	16.06	26	N.A.	N.A.	8.29e-12	26	2.67e-05	26	1	2	3	4	Portugal	Textile WWTPs	56							N.A.
Hydrocarbons	Heptadecane, 2,3-dimethyl-	61868-03-9	Not available	NO	1	-	NO	-	NO	NO	268.527	9.53	26	N.A.	N.A.	3.97e-05	26	0.383	26	N.A.	N.A.	N.A.	N.A.	Morocco	Textile effluents	35							N.A.
Hydrocarbons	Hexacosane	630-01-3	Not available	NO	1	-	NO	-	NO	NO	366.7	13.11	26	N.A.	N.A.	9.07e-09	26	6.25e-05	26				4	Portugal	Textile WWTPs	56							N.A.
Hydrocarbons	Hexadecane, 2-methyl-	1560-92-5	Not available	NO	1	-	NO	-	NO	NO	240.5	8.62	26	N.A.	N.A.	0.00034	26	1.1	26	N.A.	N.A.	N.A.	N.A.	Morocco	Textile effluents	35							N.A.
Hydrocarbons	Hexane, 2,4-dimethyl-	589-43-5	Not available	NO	1	-	NO	-	NO	NO	114.23	4.12	26	N.A.	N.A.	9.2	26	4050	26	1				Morocco	Textile effluents	35							N.A.
Hydrocarbons	Octadecane	593-45-3	Not available	NO	1	-	NO	-	NO	NO	254.5	9.18	26	N.A.	N.A.	9.35e-05	26	0.195	26	1	2	3	4	Portugal	Textile WWTPs	56							N.A.
Hydrocarbons	Octadecane, 3-ethyl-5-(2-ethylbutyl)-	55282-12-7	Not available	NO	1	-	NO	-	NO	NO	366.7	12.89	26	N.A.	N.A.	1.4e-08	26	0.00212	26	N.A.	N.A.	N.A.	N.A.	Morocco	Textile effluents	35							N.A.
Hydrocarbons	Octadecane, 6-methyl-	10544-96-4	Not available	NO	1	-	NO	-	NO	NO	268.5	9.6	26	N.A.	N.A.	3.43e-05	26	0.248	26	N.A.	N.A.	N.A.	N.A.	Morocco	Textile effluents	35							N.A.
Hydrocarbons	Octane, 5-ethyl-2-methyl-	62016-18-6	Not available	NO	1	-	NO	-	NO	NO	156.31	5.6	26	N.A.	N.A.	0.343	26	435	26	N.A.	N.A.	N.A.	N.A.	Morocco	Textile effluents	35							N.A.
Hydrocarbons	Pentane, 2,2-dimethyl-	590-35-2	Not available	NO	1	-	NO	-	NO	NO	100.2	3.67	26	N.A.	N.A.	25	26	14000	26	1				Morocco	Textile effluents	35							N.A.
Hydrocarbons	Tetramethyldodecane	127204-12-0	Not available	NO	1	-	NO	-	NO	NO	226.44	8	(Computed by XLogP3 3.0 release 2019.06.18)25	N.A.	N.A.	N.A.	N.A.	N.A.	N.A.	N.A.	N.A.	N.A.	N.A.	Portugal	Textile WWTPs	56							N.A.
Hydrocarbons	Tetratriacontane	14167-59-0	Not available	NO	1	-	NO	-	NO	NO	478.9	17.04	26	N.A.	N.A.	7.97e-13	26	1.03e-05	26	N.A.	N.A.	N.A.	N.A.	Morocco	Textile effluents	35							N.A.
Hydrocarbons	Triacontane	638-68-6	Not available	NO	1	-	NO	-	NO	NO	422.8	15.07	26	N.A.	N.A.	8.57e-11	26	3.64e-09	26	1			4	Portugal	Textile WWTPs	56							N.A.
Hydrocarbons	Tricosane	638-67-5	Not available	NO	1	-	NO	-	NO	NO	324.6	11.64	26	N.A.	N.A.	2.94e-07	26	0.00232	26				4	Portugal	Textile WWTPs	56							N.A.
Hydrocarbons	Undecane, 2,6-dimethyl-	17301-23-4	Not available	NO	1	-	NO	-	NO	NO	184.36	6.58	26	N.A.	N.A.	0.0367	26	63.7	26	N.A.	N.A.	N.A.	N.A.	Morocco	Textile effluents	35							N.A.
Hydroxylamine-related compounds	Hydroxylamine, O-methyl-	67-62-9	Not available	NO	1	-	NO	-	NO	NO	47.057	-0.4	26	N.A.	N.A.	295000	26	38800	26	N.A.	N.A.	N.A.	N.A.	Morocco	Textile effluents	35							N.A.
Hydroxylamine-related compounds	Nitroxide, bis(1,1-dimethylethyl)	2406-25-9	Not available	NO	1	-	NO	-	NO	NO	144.23	2.17	26	N.A.	N.A.	1110	26	0.2	26	N.A.	N.A.	N.A.	N.A.	Morocco	Textile effluents	35							N.A.
Hydroxylamine-related compounds	O-(2 methylpropyl) Hydroxylamine	5618-62-2	Not available	NO	1	-	NO	-	NO	NO	89.14	1	26	N.A.	N.A.	17600	26	5370	26	N.A.	N.A.	N.A.	N.A.	Morocco	Textile effluents	35							N.A.
Ketones	2-Hydroxy-iso-butyrophenone	7473-98-5	Not available	NO	1	-	NO	-	NO	NO	164.2	1.08	26	N.A.	N.A.	25300	26	0.0983	26		2	3		China	Textile-WWTPs; River	34							N.A.
Ketones	2,2-Dimethyl-2-phenylacetophenone	24650-42-8	Not available	NO	1	-	NO	-	NO	NO	256.3	2.95	26	N.A.	N.A.	66.3	26	0.00226	26		2	3	4	Portugal	Textile WWTPs	56							N.A.
Ketones	2,4-dihydroxybenzophenone	131-56-6	Not available	NO	1	-	NO	-	NO	NO	214.22	2.96	26	N.A.	N.A.	413	26	1.88e-05	26				4	Albany; USA; Portugal; China; Chile; Japan	Clothes	51;53					1.39	97	1.39	F	0.00139
Ketones	2,2',4,4'-Tetrahydroxybenzophenone	131-55-5	Not available	NO	1	-	NO	-	NO	NO	246.21	2.4	26	N.A.	N.A.	8820	26	N.A.	N.A.				4	Albany; USA; Portugal; China; Chile; Japan	Clothes	51;53					11.81	97	11.81	F	0.01181
Ketones	2,6-Di-tert-butyl-4-hydroxy-4-methylcyclohexa-2,5-dien-1-one	10396-80-2	Not available	NO	1	-	NO	-	NO	NO	236.35	3.72	26	N.A.	N.A.	60.7	26	0.00107	26		2	3		China	River	34							N.A.
Ketones	4-Hydroxybenzophenone	1137-42-4	Not available	NO	1	-	NO	-	NO	NO	198.22	3.07	26	N.A.	N.A.	406	26	0.000733	26				4	Albany; USA	Clothes	51							N.A.
Ketones	4-Penten-2-one ( vinyl acetone)	13891-87-7	Not available	NO	1	-	NO	-	NO	NO	84.12	0.61	26	N.A.	N.A.	38600	26	7590	26	N.A.	N.A.	N.A.	N.A.	Morocco	Textile effluents	35							N.A.
Ketones	Acetone	67-64-1	Not available	NO	1	-	NO	-	NO	NO	58.08	-0.24	26	N.A.	N.A.	220000	26	30900	26	1	2	3		Morocco	Textile effluents	35			10	97	5.54	97	5.54	F	0.00554
Ketones	Acetophenone	98-86-2	Not available	NO	1	-	NO	-	NO	NO	120.15	1.58	25	N.A.	N.A.	6130	25	52	25		2		4	China	Textile WWTPs; River	34					155	97	155	F	0.155
Ketones	Oxybenzone	131-57-7	Not available	NO	1	CoRAP ongoing procedures	YES	-	NO	NO	228.24	3.79	25	N.A.	N.A.	3.7	25	0.000189	25				4	Albany; USA; Portugal; China; Chile; Japan	Clothes	51;53					4.15	97	4.15	F	0.00415
Ketones	Hydroxyacetone	116-09-6	Not available	NO	1	-	NO	-	NO	NO	74.08	-0.7	(Computed by XLogP3 3.0 release 2021.10.14) 25	N.A.	N.A.	N.A.	N.A.	N.A.	N.A.	1	2	3		Morocco	Textile effluents	35							N.A.
Ketones	dioxybenzone	131-53-3	Not available	NO	1	-	NO	-	NO	NO	244.24	3.3	26	N.A.	N.A.	N.A.	N.A.	N.A.	N.A.				4	Albany; USA; Portugal; China; Chile; Japan	Clothes	53					1.14	97	1.14	F	0.00114
Ketones	Tricyclo[6.3.0.0(2,6)]undecan-10-one, 3-[(2-methoxyethoxy)methoxy]-2-methyl-	1005253-73-5	Not available	NO	1	-	NO	-	NO	NO	282.38	0.77	26	N.A.	N.A.	3400	26	0.004	26	N.A.	N.A.	N.A.	N.A.	Morocco	Textile effluents	35							N.A.
Ketones	1-Indanone	83-33-0	Not available	NO	1	-	NO	-	NO	NO	132.16	2.11	26	N.A.	N.A.	1430	26	3.56	26		2	3		Bangladesh; Philippines; Georgia; Potugal; China; Bulgaria; Latvia; Lithuania; India; Indonesia; Turkey; Cambodia; Swtizerland; Italy; Egypt; Pakistan; Poland	Clothes	68							N.A.
N-nitrosoamine	N-nitrosodibutylamine (NDBA)	924-16-3	Not available	NO	1	-	NO	-	NO	NO	158.24	2.63	25	N.A.	N.A.	1270	25	6.25	25	1			4	China; Spain	Textile effluents	36; 69							N.A.
N-nitrosoamine	N-nitrosodiethylamine (NDEA)	55-18-5	Not available	NO	1	-	NO	-	NO	NO	102.14	0.48	26	N.A.	N.A.	44800	26	204	26	1			4	China; Spain	Textile effluents	36; 69	10.2	97	500	97	775	97	10.2	A	0.0102
N-nitrosoamine	N-nitrosodimethylamine (NDMA)	62-75-9	Annex XVII- Appendix 2 Carcinogens (category 2)	YES	4; 5	-	NO	-	NO	NO	74.08	-0.57	26	N.A.	N.A.	410000	26	573	26	1			4	China; Spain	Textile effluents	36; 69	4	97	280	97	940	97	4	A	0.004
N-nitrosoamine	N-nitrosomorpholine (NMOR)	59-89-2	Not available	NO	1	-	NO	-	NO	NO	116.12	-0.44	26	N.A.	N.A.	246000	26	17.9	26	1			4	China	Textile effluents	69							N.A.
N-nitrosoamine	N-nitrosopiperidine (NPIP)	100–75–4	Not available	NO	1	-	NO	-	NO	NO	114.15	0.36	26	N.A.	N.A.	76500	26	27.6	26	1			4	Spain	Textile effluents	36							N.A.
N-nitrosoamine	N-nitrosopyrrolidine (NPYR)	930–55–2	Not available	NO	1	-	NO	-	NO	NO	100.12	-0.19	26	N.A.	N.A.	170000	26	35.2	26	1			4	China; Spain	Textile effluents	36; 69							N.A.
Organobromine compounds	Hexabromocyclododecane (HBCD)	3194-55-6	Annex XIV and SVHC candidate as PBT and POP	YES	4; 8; 10	-	NO	-	NO	YES	641.7	5.59	-	N.A.	N.A.	0.066	30	6.3e-05	30				4	Japan	River; Sediment	70							N.A.
Organochlorine compounds	1-Chloro-2-(diethoxymethyl)benzene	35364-86-4	Not available	NO	1	-	NO	-	NO	NO	214.69	3.07	26	N.A.	N.A.	88.4	26	1.11	26	1				Morocco	Textile effluents	35							N.A.
Organochlorine compounds	Pentachlorobenzene	608-93-5	POP	YES	8	-	NO	POP	YES	YES	250.3	5.18	25	N.A.	N.A.	0.831	25	0.267	25		2	3		China	River	34			0.3	97	0.13	97	0.13	F	0.00013
Organochlorine compounds	Perchloropentacyclodecane (MIREX)	2385-85-5	POP	YES	8	-	NO	POP	YES	NO	545.5	6.89	25	N.A.	N.A.	0.085	25	0.000107	25				4	Turkey	Textile WWTPs	50			0.104	97	0.023	97	0.023	F	2.3e-05
Organochlorine compounds	Triclosan	3380-34-5	Biocide no longer authorized in Europe by 2016 according to the Biocides Reg. n. 528/2012	YES	11	CoRAP follow-up under assessment as ED and PBT	YES	-	NO	YES	289.5	4.76	25	7.9	25	10	25	0.00062	26	1		3	4	Greece	Textile WWTPs	45			0.24	97	0.25	97	0.24	D	0.00024
Organoiodine compounds	Dodecyl iodide/1-iodo-dodecane	4292-19-7	Not available	NO	1	-	NO	-	NO	NO	296.23	6.99	26	N.A.	N.A.	0.0138	26	0.523	26	N.A.	N.A.	N.A.	N.A.	China	Textile WWTPs; River	34							N.A.
Organophosphates (OPEs)	tris(1,3-dichloroisopropyl) phosphate (TDCIPP)	13674-87-8	Not available	NO	1	-	NO	-	NO	YES	430.9	3.65	25	N.A.	N.A.	7	25	3.81e-05	26				4	Brazil	River; Clothes	71;72					0.418	97	0.418	F	0.000418
Organophosphates (OPEs)	2-ethylhexyl diphenyl phosphate (EHDPHP)	1241-94-7	Not available	NO	1	-	NO	-	NO	NO	362.4	5.73	25	N.A.	N.A.	1.9	25	0.00445	25				4	Brazil	River; Clothes	71;72			0.15	97			0.15	D	0.00015
Organophosphates (OPEs)	2-Propanol,1-chloro Phosphate (3:1)(TCPP) or Tris(2-chloroisopropyl) phosphate (TCIPP)	13674-84-5	Not available	NO	1	-	NO	-	NO	YES	327.6	2.59	26	N.A.	N.A.	51.9	26	0.00751	26				4	China; Brazil	Textile WWTPs; River; Clothes	34; 71-73							N.A.
Organophosphates (OPEs)	Bis(2-chloroethyl) phosphate (BCEP)	3040-56-0	Not available	NO	1	-	NO	-	NO	NO	222.99	0.83	26	N.A.	N.A.	6460	26	0.000589	26				4	China	Textile WWTPs; River	73							N.A.
Organophosphates (OPEs)	Bisphenol A Bis(diphenyl phosphate) (BDP)	5945-33-5	Not available	NO	1	-	NO	-	NO	NO	692.6	10.8	(Computed by XLogP3 3.0 release 2021.10.14) 25	N.A.	N.A.	N.A.	N.A.	N.A.	N.A.				4	Bangladesh; Philippines; Georgia; Potugal; China; Bulgaria; Latvia; Lithuania; India; Indonesia; Turkey; Cambodia; Swtizerland; Italy; Egypt; Pakistan; Poland	Clothes	72							N.A.
Organophosphates (OPEs)	Cresyl diphenyl phosphate (CDPP)	26444-49-5	Not available	NO	1	-	NO	-	NO	NO	340.3	5.25	26	N.A.	N.A.	0.234	26	1.39e-05	26				4	Bangladesh; Philippines; Georgia; Potugal; China; Bulgaria; Latvia; Lithuania; India; Indonesia; Turkey; Cambodia; Swtizerland; Italy; Egypt; Pakistan; Poland	Clothes	72					1.06	97	1.06	F	0.00106
Organophosphates (OPEs)	Di-n-butyl phosphate (DNBP)	107-66-4	Not available	NO	1	-	NO	-	NO	NO	210.21	1.5	(Computed by XLogP3 3.0 release 2021.10.14) 25	N.A.	N.A.	17200	26	0.00243	26				4	China	Textile WWTPs; River	73							N.A.
Organophosphates (OPEs)	Diphenyl phosphate (DPHP)	838-85-7	Not available	NO	1	-	NO	-	NO	NO	250.19	2.88	26	N.A.	N.A.	82.4	26	1.22e-05	26				4	China	Textile WWTPs; River	73							N.A.
Organophosphates (OPEs)	Isodecyl Diphenyl Phosphate (IDDP)	29761-21-5	Not available	NO	1	-	NO	-	NO	NO	390.5	5.44	25	N.A.	N.A.	0.75	25	6.29e-06	26				4	Bangladesh; Philippines; Georgia; Potugal; China; Bulgaria; Latvia; Lithuania; India; Indonesia; Turkey; Cambodia; Swtizerland; Italy; Egypt; Pakistan; Poland	Clothes	72					6700	97	6700	F	6.7
Organophosphates (OPEs)	Resorcinol Bis(diphenyl Phosphate) (RDP)	57583-54-7	Not available	NO	1	-	NO	-	NO	NO	574.5	7.6	(Computed by XLogP3 3.0 release 2021.10.14) 25	N.A.	N.A.	N.A.	N.A.	N.A.	N.A.				4	Bangladesh; Philippines; Georgia; Potugal; China; Bulgaria; Latvia; Lithuania; India; Indonesia; Turkey; Cambodia; Swtizerland; Italy; Egypt; Pakistan; Poland	Clothes	72							N.A.
Organophosphates (OPEs)	t-Butylphenyl diphenyl phosphate (BPDP)	56803-37-3	Not available	NO	1	-	NO	-	NO	NO	382.4	5.12	25	N.A.	N.A.	3.2	25	0.000187	25				4	Bangladesh; Philippines; Georgia; Potugal; China; Bulgaria; Latvia; Lithuania; India; Indonesia; Turkey; Cambodia; Swtizerland; Italy; Egypt; Pakistan; Poland	Clothes	72			0.3	97			0.3	D	0.0003
Organophosphates (OPEs)	Triethyl phosphate (TEP)	78-40-0	Not available	NO	1	-	NO	-	NO	NO	182.15	0.8	25	N.A.	N.A.	500000	25	52	25				4	China	River; Clothes	34; 72			> 100	97	1250	97	1250	F	1.25
Organophosphates (OPEs)	Trimethyl phosphate (TMP)	512-56-1	Not available	NO	1	-	NO	-	NO	YES	140.07	-0.5	25	N.A.	N.A.	500000	25	113	25				4	China	Textile WWTPs; River	73					7010	97	7010	F	7.01
Organophosphates (OPEs)	Trimethylphenyl phosphate (TMPP)	1330-78-5	Not available	NO	1	CoRAP Need for follow-up regulatory action at EU level	YES	-	NO	NO	368.117	6.34	26	N.A.	N.A.	0.184	26	4.65e-06	26				4	China	Clothes	72	0.29	97	0.09	97	0.082	97	0.082	F	8.2e-05
Organophosphates (OPEs)	Tripropyl phosphate (TPP)	513-08-6	Not available	NO	1	-	NO	-	NO	NO	224.23	1.87	26	N.A.	N.A.	827	26	3.08	26				4	Bangladesh; Philippines; Georgia; Potugal; China; Bulgaria; Latvia; Lithuania; India; Indonesia; Turkey; Cambodia; Swtizerland; Italy; Egypt; Pakistan; Poland	Clothes	72					159.1	97	159	F	0.159
Organophosphates (OPEs)	Tris(2-butoxyethyl) phosphate (TBOEP)	78-51-3	Not available	NO	1	-	NO	-	NO	NO	398.5	3.75	25	N.A.	N.A.	1.96	26	0.00016	25				4	Brazil	River; Clothes	71;72					3.34	97	3.34	F	0.00334
Organophosphates (OPEs)	Tris(2-chloroethyl) phosphate (TCEP)	115-96-8	Annex XIV, SVHC (TR)	YES	12	-	NO	-	NO	YES	285.5	1.78	25	N.A.	N.A.	878	25	8.17	25				4	China; Brazil	Textile WWTPs; River; Clothes	34; 71-73					66	97	66	F	0.066
Organophosphates (OPEs)	Tris(2-ethylhexyl) phosphate (TEHP)	78-42-2	Not available	NO	1	-	NO	-	NO	NO	434.6	9.49	26	N.A.	N.A.	1.46e-05	26	1.1e-05	26				4	China; Brazil	Textile WWTPs; River; Clothes	71-73			0.15	101			0.15	D	0.00015
Organophosphates (OPEs)	Tris(3-Chloropropyl)phosphate	1067-98-7	Not available	NO	1	-	NO	-	NO	NO	327.6	3.11	26	N.A.	N.A.	18.8	26	0.000639	26				4	China	River	34							N.A.
Organophosphates (OPEs)	Tris(b-Chloropropyl)phosphate	6145-73-9	Not available	NO	1	-	NO	-	NO	NO	327.6	2.89	26	N.A.	N.A.	28.9	26	0.00701	26				4	China	River	34					13.5	97	13.5	F	0.0135
Organophosphates (OPEs)	Tris(butyl) phosphate (TNBP)	126-73-8	Not available	NO	1	CoRAP - No need for follow up	YES	-	NO	NO	266.31	4	25	N.A.	N.A.	280	25	0.151	25				4	China; Brazil	Textile WWTPs; River; Clothes	34; 44; 71-73			2.1	97	4.2	97	2.1	D	0.0021
Organophosphates (OPEs)	Tris(isobutyl) phosphate (TIBP)	126-71-6	Not available	NO	1	-	NO	-	NO	NO	266.31	3.6	26	N.A.	N.A.	16.2	26	1.71	26				4	Brazil; China	River; Clothes	34; 71; 72							N.A.
Organophosphates (OPEs)	Tris(phenyl) phosphate (TPHP)	115-86-6	Not available	NO	1	CoRAP Identification as SVHC	YES	-	NO	NO	326.3	4.59	25	N.A.	N.A.	1.9	25	0.000267	25				4	China; Brazil	Textile WWTPs; River; Clothes	44; 71-73			0.09	97	0.29	97	0.09	D	9e-05
Organosilicon compounds	Benzoic acid, 2,4-bis[(trimethylsilyl)oxy]-, trimethylsilyl ester (TMS BOA)	10586-16-0	Not available	NO	1	-	NO	-	NO	NO	370.66	7.31	26	N.A.	N.A.	0.00263	26	0.00619	26					Morocco	Textile effluents	35							N.A.
Organosilicon compounds	Octamethylcyclotetrasiloxane (D4)	556-67-2	Annex XVII, Under assessment as POP, SVHC as PBT and vPvB	YES	4; 13	-	NO	-	NO	YES	296.61	6.74	25	N.A.	N.A.	0.056	25	140	25			3	4	Turkey	Textile WWTPs	50			23.44	97			23.44	D	0.02344
Organosilicon compounds	Oleic acid, Trimethylsilyl ester	21556-26-3	Not available	NO	1	-	NO	-	NO	NO	354.6	9.79	26	N.A.	N.A.	2.53e-05	26	0.000769	26		2	3		Morocco	Textile effluents	35							N.A.
Organosulfur componds	2-(4-tert-butylphenoxy)cyclohexyl prop-2-yne-1-sulfonate (Propargite)	2312-35-8	Not available	NO	1	CoRAP - No need for follow up	YES	-	NO	NO	350.5	5.7	25	N.A.	N.A.	0.215	25	4e-05	25	1			4	China	Textile WWTPs; River	34					0.03	97	0.03	F	3e-05
Organosulfur componds	2-Ethylthiolane, S,S-dioxide	10178-59-3	Not available	NO	1	-	NO	-	NO	NO	148.23	0.67	26	N.A.	N.A.	20600	26	7.47	26		2	3		Morocco	Textile effluents	35							N.A.
Organosulfur componds	Methane carbothiolic acid (thioacetic acid)	507-09-5	Not available	NO	1	-	NO	-	NO	NO	76.12	0.14	26	N.A.	N.A.	102000	26	6730	26	N.A.	N.A.	N.A.	N.A.	Morocco	Textile effluents	35							N.A.
Organosulfur compounds	2,6-Diamino-4-cyclohexyl-4H-thiopyran-3,5-dicarbonitrile	315246-53-8	Not available	NO	1	-	NO	-	NO	NO	260.363	0.17	26	N.A.	N.A.	82300	26	1.32e-06	26	N.A.	N.A.	N.A.	N.A.	Morocco	Textile effluents	35							N.A.
Organosulfur compounds	Diacetyl sulfide	3232-39-1	Not available	NO	1	-	NO	-	NO	NO	118.16	-0.88	26	N.A.	N.A.	571000	26	123	26	N.A.	N.A.	N.A.	N.A.	Morocco	Textile effluents	35							N.A.
Organosulfur compounds	Disulfide, propyl 1-(propylthio)ethyl	69078-86-0	Not available	NO	1	-	NO	-	NO	NO	210.4	4.34	26	N.A.	N.A.	7.57	26	0.837	26	N.A.	N.A.	N.A.	N.A.	Morocco	Textile effluents	35							N.A.
Organosulfur compounds	Isoprothiolane	50512-35-1	Not available	NO	1	-	NO	-	NO	NO	290.4	3.16	26	N.A.	N.A.	54	26	1.9	26	1	2		4	China	River	34					8.1	97	8.1	F	0.0081
Organosulfur compounds	Ketone, methyl 2-methyl-1,3-oxothiolan-2-yl	33266-06-7	Not available	NO	1	-	NO	-	NO	NO	146.21	0.56	26	N.A.	N.A.	26300	26	38.4	26	N.A.	N.A.	N.A.	N.A.	Morocco	Textile effluents	35							N.A.
Organosulfur compounds	Phenyl vinyl sulfone	5535-48-8	Not available	NO	1	-	NO	-	NO	NO	168.21	0.92	26	N.A.	N.A.	10300	26	0.289	26		2	3	4	China	Textile WWTPs; River	34							N.A.
Parabens	Methyl 4-hydroxybenzoate	99-76-3	Not available	NO	1	CoRAP follow-up	YES	-	NO	NO	152.15	1.96	26	N.A.	N.A.	2500	26	0.0316	26				4	China; Chile; Japan; Portugal; USA; Albany	Clothes	53							N.A.
Parabens	Ethyl 4-hydroxybenzoate	120-47-8	Not available	NO	1	CoRAP - No need for follow up	YES	-	NO	NO	166.17	2.47	26	8.34	26	885	26	0.0124	26				4	China; Chile; Japan; Portugal; USA; Albany; Spain	Clothes	53; 55							N.A.
Parabens	Propyl 4-hydroxybenzoate	94-13-3	Not available	NO	1	CoRAP Identification as SVHC (authorisation) and follow up for regulatory action at EU level	YES	-	NO	NO	180.2	3.04	26	N.A.	N.A.	500	26	0.074	26				4	China; Chile; Japan; Portugal; USA; Albany	Clothes	53							N.A.
Parabens	Butyl 4-hydroxybenzoate	94-26-8	SVHC candidate as ED	YES	4	-	NO	-	NO	NO	194.23	3.57	26	8.47	26	207	(at 20°C) 26	0.0248	26	N.A.	N.A.	N.A.	N.A.	China; Chile; Japan; Portugal; USA; Albany	Clothes	53							N.A.
Parabens	Benzyl 4-hydroxybenzoate	94-18-8	Not available	NO	1	-	NO	-	NO	NO	228.24	3.6	26	N.A.	N.A.	N.A.	N.A.	N.A.	N.A.				4	China; Chile; Japan; Portugal; USA; Albany	Clothes	53							N.A.
Parabens	Heptylparaben	1085-12-7	Not available	NO	1	-	NO	-	NO	NO	236.31	4.83	26	N.A.	N.A.	N.A.	N.A.	N.A.	N.A.				4	China; Chile; Japan; Portugal; USA; Albany	Clothes	53							N.A.
Parabens	Ethyl 3,4-dihydroxybenzoate	3943-89-3	Not available	NO	1	-	NO	-	NO	NO	182.17	1.8	26	N.A.	N.A.	N.A.	N.A.	N.A.	N.A.				4	China; Chile; Japan; Portugal; USA; Albany	Clothes	53							N.A.
Parabens	Methyl 3,4-dihydroxybenzoate	2150-43-8	Not available	NO	1	-	NO	-	NO	NO	168.15	1.5	26	8.18; 13.04	26	N.A.	N.A.	N.A.	N.A.				4	China; Chile; Japan; Portugal; USA; Albany	Clothes	53							N.A.
Parabens	4-hydroxybenzoic acid	99-96-7	Not available	NO	1	CoRAP - No need for follow up	YES	-	NO	NO	138.12	1.58	26	4.54	26	5000	26	2.53e-05	26				4	China; Chile; Japan; Portugal; USA; Albany	Clothes	53					> 99.44	97	99.44	F	0.09944
Per and Polyfluorinated alkylated substances (PFAS)	Perfluorooctanoic acid (PFOA)	335-67-1	SVHC candidate as TR, PBT, suspected C, POP	YES	4; 8	-	NO	POP	YES	YES	414.07	5.3	-	N.A.	N.A.	9500	30	70	30		2	3	4	China; Korea; Germany; Switzerland; Austria	Textile effluents; River; Clothes; Sludge receiving textile wastewater; River sediment	74; 76 - 85			0.47	97	24.6	97	0.47	D	0.00047
Per and Polyfluorinated alkylated substances (PFAS)	Perfluorooctanesulfonic acid (PFOS)	1763-23-1	POP	YES	14	-	NO	-	NO	YES	500.13	6.3	-	N.A.	N.A.	680	30	0.267	30		2	3	4	China; Korea; Germany; Switzerland	Textile effluents; River; Clothes; Sludge receiving textile wastewater; River sediment	75-79; 82; 83; 85			49.27	97	68	97	49.27	D	0.04927
Per and Polyfluorinated alkylated substances (PFAS)	Fluorotelomer unsaturated carboxylic acid (6:2 FTUCA)	70887-88-6	Not available	NO	1	-	NO	-	NO	YES	358.08	3.7	(Computed by XLogP3 3.0 release 2019.06.18) 25	N.A.	N.A.	N.A.	N.A.	N.A.	N.A.		2	3	4	China	Textile effluents, River	76			>100	97			100	D	0.1
Per and Polyfluorinated alkylated substances (PFAS)	Fluorotelomer unsaturated carboxylic acid (8:2 FTUCA)	161094-76-4	Not available	NO	1	-	NO	-	NO	YES	458.1	5.1	(Computed by XLogP3 3.0 release 2019.06.18) 25	N.A.	N.A.	N.A.	N.A.	N.A.	N.A.		2	3	4	China	Textile effluents, River	76							N.A.
Per and Polyfluorinated alkylated substances (PFAS)	2H-Perfluoro-2-dodecenoic acid (10:2 FTUCA)	70887-94-4	Not available	NO	1	-	NO	-	NO	YES	558.11	6.4	(Computed by XLogP3 3.0 release 2019.06.18) 25	N.A.	N.A.	N.A.	N.A.	N.A.	N.A.		2	3	4	China	Textile effluents	76			0.83	97			0.83	D	0.00083
Per and Polyfluorinated alkylated substances (PFAS)	Pentafluoropropionic anhydride (PFPA)	356-42-3	Not available	NO	1	-	NO	-	NO	YES	310.05	2.19	26	N.A.	N.A.	146	26	15500	26		2	3	4	Germany	Clothes	81							N.A.
Per and Polyfluorinated alkylated substances (PFAS)	Perfluorobutane sulfonic acid (PFBS)	375-73-5	SVHC candidate as PBT	YES	4	-	NO	-	NO	YES	300.1	1.98	-	N.A.	N.A.	510	31	32	31		2	3	4	Korea; China; Germany	Textile WWTPs; River; Clothes; River Sediment	78; 79; 82; 83; 85							N.A.
Per and Polyfluorinated alkylated substances (PFAS)	Perfluorobutyric acid (PFBA)	375-22-4	Not available	NO	1	-	NO	-	NO	YES	214.03	1.43	-	N.A.	N.A.	447	32	849	32		2	3	4	China; Germany; Switzerland	Textile effluents; River; Clothes; Sludge receiving textile wastewater; River sediment	76; 75; 80-85					83.6	97	83.6	F	0.0836
Per and Polyfluorinated alkylated substances (PFAS)	Perfluorodecane sulfonic acid (PFDS)	335-77-3	Not available	NO	1	-	NO	-	NO	YES	600.15	6.4	(Computed by XLogP3 3.0 release 2021.10.14) 25	N.A.	N.A.	N.A.	N.A.	N.A.	N.A.		2	3	4	Korea; Germany	Textile WWTPs; River; Clothes; River sediment	77 - 79; 85;							N.A.
Per and Polyfluorinated alkylated substances (PFAS)	Perfluorododecanoic acid (PFDoDA)	307-55-1	Annex XVII and SVHC (PBT)	YES	4; 15	-	NO	-	NO	YES	614.1	7.6	(Computed by XLogP3 3.0 release 2021.10.14) 25	N.A.	N.A.	N.A.	N.A.	N.A.	N.A.		2	3	4	Korea; China; Germany; Austria	Textile WWTPs; River; Clothes; River sediment	74; 77-79; 81; 83-85							N.A.
Per and Polyfluorinated alkylated substances (PFAS)	Perfluoroheptanoic acid (PFHpA)	375-85-9	SVHC as R and PBT	YES	4	-	NO	-	NO	YES	364.06	5.33	26	N.A.	N.A.	0.353	26	149	26		2	3	4	China; Korea; Germany; Switzerland; Austria	Textile effluents; River; Clothes; Sludge receiving textile wastewater River sediment	74 -79; 81-85			> 1019.37	97			1019.37	D	1.01937
Per and Polyfluorinated alkylated substances (PFAS)	Perfluorohexadecanoic acid (PFHxDA)	67905-19-5	Not available	NO	1	-	NO	-	NO	YES	814.13	10.3	(Computed by XLogP3 3.0 release 2021.10.14) 25	N.A.	N.A.	N.A.	N.A.	N.A.	N.A.		2	3	4	China	Textile WWTPs	84							N.A.
Per and Polyfluorinated alkylated substances (PFAS)	Perfluorohexane sulfonic acid (PFHxS)	355-46-4	SVHC candidate as vPvB and POP	YES	4; 16	-	NO	POP	YES	YES	400.115	4.34	26	N.A.	N.A.	0.597	26	0.61	26		2	3	4	Korea; China; Germany	Textile WWTPs; River; Clothes; River sediment	77-79; 82; 83; 85							N.A.
Per and Polyfluorinated alkylated substances (PFAS)	Perfluorohexanoic acid (PFHxA)	307-24-4	Annex XVII (Draft)	YES	17	-	NO	-	NO	YES	314.05	2.85	-	N.A.	N.A.	29.3	33	121	33		2	3	4	China; Korea; Austria	Textile effluents; Textile-WWTPs; River; WWTP receiving textile wastewater; River sediment	74; 75; 77-85					76.3	97	76.3	F	0.0763
Per and Polyfluorinated alkylated substances (PFAS)	Perfluoro-n-decanoic acid (PFDA)	335-76-2	Annex XVII and SVHC (PBT and TR)	YES	4; 15	-	NO	-	NO	YES	514.08	7.37	26	-0.17	26	8.3e-06	26	5.19	26		2	3	4	China; Korea; Germany; Austria	Textile effluents; Textile WWTPs; River; Clothes; River sediment	74; 76-79; 81; 83-85			258.58	97	32	97	32	F	0.032
Per and Polyfluorinated alkylated substances (PFAS)	Perfluorononanoic acid (PFNA)	375-95-1	Annex XVII and SVHC candidate as PBT and TR	YES	4; 15	-	NO	-	NO	YES	464.12	6.18	-	N.A.	N.A.	464	31	10	31		2	3	4	Korea; Germany; Austria	Textile WWTPs; River; Clothes; WWTPs receiving textile wastewater; River sediment	74; 77- 79; 81- 85			80	97	84	97	80	D	0.08
Per and Polyfluorinated alkylated substances (PFAS)	Perfluorooctadecanoic acid (PFOcDA)	16517-11-6	Not available	NO	1	-	NO	-	NO	YES	914.1	11.6	(Computed by XLogP3 3.0 release 2021.10.14) 25	N.A.	N.A.	N.A.	N.A.	N.A.	N.A.		2	3	4	China	Textile WWTPs	84							N.A.
Per and Polyfluorinated alkylated substances (PFAS)	Perfluorooctanesulfonamide (PFOSA)	754-91-6	POP	YES	14	-	NO	-	NO	YES	499.15	7.58	26	N.A.	N.A.	0.000242	26	33.1	26		2	3	4	Germany	Textile WWTPs; River; Clothes	79
Per and Polyfluorinated alkylated substances (PFAS)	Perfluoropentanoic acid (PFPeA)	2706-90-3	Not available	NO	1	-	NO	-	NO	YES	264.05	3.43	26	N.A.	N.A.	61.1	26	688	26		2	3	4	China; Switzerland	Textile effluents; River; Clothes; Sludge receiving textile wastewater; River sediment	75; 76; 82-85					31.8	97	31.8	F	0.0318
Per and Polyfluorinated alkylated substances (PFAS)	Perfluorotetradecanoic acid (PFTeDA)	376-06-7	Annex XVII and SVHC candidate as vPvB	YES	4; 15	-	NO	-	NO	YES	714.11	9	(Computed by XLogP3 3.0 release 2021.10.14) 25	N.A.	N.A.	N.A.	N.A.	N.A.	N.A.		2	3	4	China; Korea	Textile effluents; River; Textile WWTPs; River sediment	76; 77; 83- 85							N.A.
Per and Polyfluorinated alkylated substances (PFAS)	Perfluorotridecanoic acid (PFTrDA)	72629-94-8	Annex XVII and SVHC candidate as vPvB	YES	4; 15	-	NO	-	NO	YES	664.1	8.3	(Computed by XLogP3 3.0 release 2021.10.14) 25	N.A.	N.A.	N.A.	N.A.	N.A.	N.A.		2	3	4	China; Korea	Textile effluents; River; Textile WWTPs; River sediment	76-78; 83-85							N.A.
Per and Polyfluorinated alkylated substances (PFAS)	Perfluoroundecanoic acid (PFUnDA)	2058-94-8	Annex XVII and SVHC candidate as vPvB	YES	4; 15	-	NO	-	NO	YES	564.09	6.9	(Computed by XLogP3 3.0 release 2021.10.14) 25	N.A.	N.A.	N.A.	N.A.	N.A.	N.A.		2	3	4	Korea; China; Germany; Austria	Textile WWTPs; River; Clothes; River sediment	74; 77; 78; 81; 83-85							N.A.
Peroxides	Bis-t-butyldioxyisopropyl benzene	2212-81-9	Not available	NO	1	CoRAP - No need for follow up	YES	-	NO	NO	338.5	7.34	26	N.A.	N.A.	0.00395	26	0.00228	26		2	3		Croatia	River	47							N.A.
Peroxides	Ethaneperoxoic acid, 1-cyano-1-(2-methylphenyl)ethyl ester	58422-67-6	Not available	NO	1	-	NO	-	NO	NO	219.24	2.43	26	N.A.	N.A.	157	26	0.0125	26	N.A.	N.A.	N.A.	N.A.	Morocco	Textile effluents	35							N.A.
Peroxides	Tert-butyl hydroperoxide (TBHP)	75-91-2	Not available	NO	1	-	NO	-	NO	NO	90.12	0.94	26	N.A.	N.A.	19700	26	729	26	1				Morocco	Textile effluents	35					77.1	97	77.1	F	0.0771
Phenols	(Benzotriazol-2-yl)-4-methylphenol (UV-P)	2440-22-4	Not available	NO	1	CoRAP - No need for follow up	YES	-	NO	NO	225.25	4.31	26	N.A.	N.A.	25.6	26	2.49e-05	26				4	Sweden	Clothes	44; 65							N.A.
Phenols	(-)-6R,7S-Naphtho[2,3-d]-1,3-dioxol-5-ol, 3a,4,9,9a-tetrahydro-2,2-dimethyl-	685510-21-8	Not available	NO	1	-	NO	-	NO	NO	220.26	2.93	26	N.A.	N.A.	408	26	0.00257	26	N.A.	N.A.	N.A.	N.A.	Morocco	Textile effluents	35							N.A.
Phenols	(+/-)-cis-3a,4,9,9a-Tetrahydro-2,2-dimethylnaphtho(2,3-d)-1,3-dioxol-5-ol	52187-19-6	Not available	NO	1	-	NO	-	NO	NO	220.26	2.93	26	N.A.	N.A.	408	26	0.00257	26		2	3		Morocco	Textile effluents	35							N.A.
Phenols	2,2′-methylene-bis(6-tert-butyl-4-methylphenol (Cyanox 2246 )	119-47-1	SVHC (TR)	YES	4	-	NO	-	NO	NO	340.5	6.25	26	N.A.	N.A.	0.124	26	3.31e-07	26	N.A.	N.A.	N.A.	N.A.	Croatia	River	47							N.A.
Phenols	2,4-Dinitrophenol	51-28-5	Not available	NO	1	-	NO	-	NO	NO	184.11	1.67	25	4.09	25	1970	26	0.00172	26	1	2	3		Sweden	Clothes	44			0.6	97	0.06	97	0.06	F	6e-05
Phenols	2,5-Diethylphenol	876-20-0	Not available	NO	1	-	NO	-	NO	NO	150.22	3.59	26	N.A.	N.A.	248	26	1.69	26	N.A.	N.A.	N.A.	N.A.	Morocco	Textile effluents	35							N.A.
Phenols	2,6-Di-tert.-butyl-4-methoxymethylphenol (Ionol 4)	87-97-8	Not available	NO	1	-	NO	-	NO	NO	250.38	4.26	26	N.A.	N.A.	20.5	26	0.00347	26	N.A.	N.A.	N.A.	N.A.	Portugal	Textile WWTPs	56							N.A.
Phenols	2,6-Di-tert-butyl-4-ethylphenol (Ionol 2)	4130-42-1	Not available	NO	1	-	NO	-	NO	NO	234.38	5.52	26	N.A.	N.A.	2.12	26	0.289	26	1	2	3	4	Portugal	Textile WWTPs	56							N.A.
Phenols	3-Nitrophenol	554-84-7	Not available	NO	1	-	NO	-	NO	NO	139.11	2	25	N.A.	N.A.	13.6	25	0.02	25	1	2	3		Sweden	Clothes	44			0.23	97	1.3	97	0.23	D	0.00023
Phenols	4-Methylphenol (p-cresol)	106-44-5	Not available	NO	1	CoRAP - No need for follow up	YES	-	NO	YES	108.14	1.94	25	10.26	25	21500	25	14.7	25	1			4	China	Textile WWTPs; River	34			1.4	97	7	97	1.4	D	0.0014
Phenols	4-Nitrophenol	100-02-7	Not available	NO	1	-	NO	-	NO	NO	139.11	1.91	25	N.A.	N.A.	15.6	25	0.0667	25	1	2	3		Sweden	Clothes	44	32	97	8.4	97	3.8	97	8.4	D	0.0084
Phenols	Butylated hydroxytoluene (BHT)	128-37-0	Not available	NO	1	CoRAP ongoing procedures	YES	-	NO	NO	220.35	5.1	26	N.A.	N.A.	5.75	26	0.688	26		2		4	China	Textile WWTPs; River	34					1.1	97	1.1	F	0.0011
Phenols	3-Chloro 2-nitrophenol	17802-02-7	Not available	NO	1	-	NO	-	NO	NO	173.55	2.55	26	N.A.	N.A.	391	26	0.0395	26	1	2	3		Sweden	Clothes	44							N.A.
Phenols	2-Chloro m-xylenol	88-04-0	Not available	NO	1	-	NO	-	NO	NO	156.61	3.27	25	N.A.	N.A.	N.A.	N.A.	N.A.	N.A.	1	2	3	4	China	Textile WWTPs; River	34			0.17	97	0.36	97	0.17	D	0.00017
Phenols	Daidzein	486-66-8	Not available	NO	1	-	NO	-	NO	NO	254.24	2.55	26	N.A.	N.A.	568	26	3.69e-09	26	N.A.	N.A.	N.A.	N.A.	China	Textile effluents	36							N.A.
Phenols	Irganox 1081 (Thioalkofen BP)	90-66-4	Not available	NO	1	-	NO	-	NO	NO	358.5	8.24	26	N.A.	N.A.	0.00191	26	1.15e-08	26		2	3	4	Croatia	River	47							N.A.
Phenols	Naringenin	480-41-1	Not available	NO	1	-	NO	-	NO	NO	272.25	2.52	26	N.A.	N.A.	475	26	3.81e-09	26	N.A.	N.A.	N.A.	N.A.	China	Textile effluents	36							N.A.
Phenols	Phenol	108-95-2	Not available	NO	1	CoRAP need for follow-up regulatory action at EU level and Restriction	YES	-	NO	YES	94.11	1.46	25	N.A.	N.A.	82800	25	46.7	25	1			4	Portugal	Textile WWTPs	56	150	97	3	97	1.55	97	1.55	F	0.00155
Phenols	Phenol,4-[2-[2-(chloromethyl)-1,3-dioxolan-2-yl]ethyl]-	37827-64-8	Not available	NO	1	-	NO	-	NO	NO	284.73	2.373	26	N.A.	N.A.	N.A.	N.A.	N.A.	N.A.		2	3		Morocco	Textile effluents	35							N.A.
Phosphonates	2-phosphonobutane- 1,2,4-tricarboxylic acid (PBTC)	37971-36-1	Not available	NO	1	-	NO	-	NO	NO	270.13	-1.36	26	N.A.	N.A.	656000	26	8.08e-09	26	1	2		4	China	Textile WWTPs	86							N.A.
Phosphonates	2-aminoethyl phosphonic acid (2-AEP)	2041-14-7	Not available	NO	1	-	NO	-	NO	NO	125.06	-1.68	26	N.A.	N.A.	1000000	26	0.00237	26	1	2		4	China	Textile WWTPs	86							N.A.
Phosphonates	Aminomethylphosphonic acid (AMPA)	1066-51-9	Not available	NO	1	-	NO	-	NO	NO	111.04	-2.17	26	N.A.	N.A.	1000000	26	0.00768	26	1	2		4	China	Textile WWTPs	86					68.78	97	68.78	F	0.06878
Phosphonates	aminotris (methylenephosphonic acid) or Nitrilotrimethylenephosphonic acid (NTMP)	6419-19-8	Not available	NO	1	-	NO	-	NO	NO	299.05	-3.563	26	N.A.	N.A.	1000000	26	2.74e-09	26	1	2		4	China; Switzerland; Germany	WWTP receiving textile wastewater; Textile WWTP	86; 87							N.A.
Phosphonates	Diethylenetriamine penta(methylene phosphonic acid) (DTPMP)	15827-60-8	Not available	NO	1	-	NO	-	NO	NO	573.2	-15.1	(Computed by XLogP3 3.0 release 2021.10.14) 25	N.A.	N.A.	N.A.	N.A.	N.A.	N.A.	1	2		4	China; Switzerland	Textile WWTPs; WWTP receiving textile wastewater	86; 87							N.A.
Phosphonates	Ethylenediamine tetra(methylene phosphonic acid) (EDTMP)	1429-50-1	Not available	NO	1	-	NO	-	NO	NO	436.12	-6.38	26	N.A.	N.A.	1000000	26	2.75e-09	26	1	2		4	China; Switzerland	Textile WWTPs; WWTP receiving textile wastewater	86; 87							N.A.
Phosphonates	Glyphosate (GLYP)	1071-83-6	Not available	NO	1	-	NO	-	NO	NO	169.07	-3.4	25	N.A.	N.A.	1000000	26	1.31e-05	25	1	2		4	China	Textile WWTPs	86			9.86	97	0.53	97	0.53	F	0.00053
Phosphonates	Hexamethylenediaminetetra(methylene phosphonic acid) (HDTMP)	56744-47-9	Not available	NO	1	-	NO	-	NO	NO	515.22	8	(Computed by Cactvs 3.4.8.18 release 2021.10.14) 25	N.A.	N.A.	N.A.	N.A.	N.A.	N.A.	1	2		4	China	Textile WWTPs	86							N.A.
Phosphonates	Iminodi (methylenephosphonic acid) (IDMP)	17261-34-6	Not available	NO	1	-	NO	-	NO	NO	205.04	-3.23	26	N.A.	N.A.	1000000	26	1.77e-08	26	1	2		4	China	Textile WWTPs	86							N.A.
Phosphonates	1-Hydroxyethane 1,1-diphosphonic acid (HEDP)	2809-21-4	Not available	NO	1	-	NO	-	NO	NO	206.03	-0.81	26	N.A.	N.A.	646000	26	1.65e-08	26	1	2		4	China	Textile WWTPs	86							N.A.
Phthalic acid esters (PAEs)	1,2-Benzenedicarboxylic acid hexyl methylester	3461-23-2	Not available	NO	1	-	NO	-	NO	NO	264.32	4.12	26	N.A.	N.A.	5.98	26	0.0635	26	1	2	3	4	China	River	34							N.A.
Phthalic acid esters (PAEs)	2-(2-Chloroethoxy)carbonyl)benzoic acid (Mono-2-chloroethyl phthalate)	6139-60-2	Not available	NO	1	-	NO	-	NO	NO	228.63	2.11	26	N.A.	N.A.	486	26	0.0102	26	1	2	3	4	China	River	34							N.A.
Phthalic acid esters (PAEs)	Benzylbutylphthalate (BBP)	85-68-7	Annex XIV, Annex XVII and SVHC (TR and ED)	YES	18; 19	-	NO	-	NO	YES	312.4	4.73	25	N.A.	N.A.	2.69	25	0.0011	25	1	2	3	4	Turkey; Italy; Portugal; China	Textile WWTPs; WWTP receiving mixed textile-domestic wastewater; Textile effluents; Clothes	50; 42; 56; 88			1.8	97	0.82	97	0.82	F	0.00082
Phthalic acid esters (PAEs)	bis (2-ethylhexyl)-3,4,5,6tetrabromo-phthalate (DEHTBP)	26040-51-7	SVHC candidate as vPvB	YES	4	-	NO	-	NO	NO	706.1	10.6	(Computed by XLogP3 3.0 release 2021.10.14) 25	N.A.	N.A.	N.A.	N.A.	N.A.	N.A.	1	2	3	4	China	Textile WWTPs	89			0.91	97			0.91	D	0.00091
Phthalic acid esters (PAEs)	Butyl 2-ethylhexyl phthalate	85-69-8	Not available	NO	1	-	NO	-	NO	NO	334.4	6.5	26	N.A.	N.A.	0.0216	26	0.00387	26	1	2	3	4	Portugal	Textile effluents	56			>0.1	97	>0.11	97	0.11	D-F	0.00011
Phthalic acid esters (PAEs)	Butyl octyl phthalate	84-78-6	Not available	NO	1	-	NO	-	NO	NO	334.4	6.82	26	N.A.	N.A.	0.0115	26	0.00187	26	1	2	3	4	Portugal	Textile effluents	56							N.A.
Phthalic acid esters (PAEs)	dibutylphthalate (DBP)	84-74-2	SVHC (TR and ED), Annex XIV, Annex XVII, Under assessment as PBT	YES	18; 19	-	NO	-	NO	YES	278.34	4.5	25	N.A.	N.A.	2.35	25	0.00268	25	1	2	3	4	China	Textile WWTPs	89			2.55	97	0.35	97	0.35	F	0.00035
Phthalic acid esters (PAEs)	Diethyl-Phthalate (DEP)	84-66-2	Not available	NO	1	CoRAP - No need for follow up	YES	-	NO	YES	222.24	2.47	25	N.A.	N.A.	N.A.	N.A.	0.28	25	1	2	3	4	Turkey; Morocco; Portogallo; Spain; China	Textile WWTPs; Textile Effluent; River; Clothes	34; 35; 50; 56; 64; 88			52	97	12	97	12	F	0.012
Phthalic acid esters (PAEs)	Di-isobutyl phthalate (DIBP)	84-69-5	Annex XIV, SVHC (TR and ED), Annex XVII	YES	18; 19	-	NO	-	NO	YES	278.34	4.11	25	N.A.	N.A.	6.2	25	0.00635	25	1	2	3	4	Italy; China	WWTP receiving mixed textile-domestic wastewater; Clothes	36; 42; 44; 88							N.A.
Phthalic acid esters (PAEs)	diisononylphthalate (DIDP)	28553-12-0/ 68515-48-0	Annex XVII	YES	20	-	NO	-	NO	YES	418.6	8.8	25	N.A.	N.A.	2.31e-05	25	7.2e-05	25	1	2	3	4	China	Textile WWTPs	89					71.85	97	71.85	F	0.07185
Phthalic acid esters (PAEs)	Diisooctyl phthalate	27554-26-3	Not available	NO	1	-	NO	-	NO	YES	390.6	8.39	25	N.A.	N.A.	0.09	25	0.000733	25	1	2	3	4	Portugal	Textile effluents	56			>0.039	97	>0.13	97	0.039	D	3.9e-05
Phthalic acid esters (PAEs)	Dimethyl 4-methylphthalate	20116-65-8	Not available	NO	1	-	NO	-	NO	NO	208.21	2.21	26	N.A.	N.A.	514	26	1.53	26	1	2	3	4	Morocco	Textile effluents	35							N.A.
Phthalic acid esters (PAEs)	Dimethyl carboxymethylhexyl phthalate	76644-65-0	Not available	NO	1	-	NO	-	NO	NO	336.4	3.7	(Computed by XLogP3 3.0 release 2021.10.14) 25	N.A.	N.A.	N.A.	N.A.	N.A.	N.A.	1	2	3	4	Portugal	Textile effluents	56							N.A.
Phthalic acid esters (PAEs)	Dimethyl phathalate (DMP)	131-11-3	Not available	NO	1	-	NO	-	NO	NO	194.18	1.6	25	N.A.	N.A.	N.A.	N.A.	0.411	25	1	2	3	4	Morocco; China	Textile effluents; River; Clothes	34; 35; 88			33	97	39	97	33	F	0.033
Phthalic acid esters (PAEs)	Di-n-decylphthalate (DNDP)	84-77-5	Not available	NO	1	-	NO	-	NO	NO	446.7	9.05	26	N.A.	N.A.	0.00022	26	1.36e-05	26	1	2	3	4	Italy	WWTP receiving mixed textile-domestic wastewater	42							N.A.
Phthalic acid esters (PAEs)	Di-n-hexylphthalate (DNHP)	84-75-3	Annex XIV, SVHC (TR), Annex XVII	YES	9; 21	-	NO	-	NO	YES	334.4	6.82	25	N.A.	N.A.	0.05	25	0.00187	25	1	2	3	4	Italy; China	WWTP receiving mixed textile-domestic wastewater; River	34; 42			>0.35	97	>0.10	97	0.1	F	0.0001
Phthalic acid esters (PAEs)	Di-n-octyl-phthalate (DnOP)	117-84-0	Annex XVII	YES	20	-	NO	-	NO	YES	390.6	8.1	26	N.A.	N.A.	0.022	25	0.000347	25	1	2	3	4	Turkey	Textile WWTPs	50					>0.05	97	0.045	F	4.5e-05
Phthalic acid esters (PAEs)	Di-n-pentyl phthalate (DNPP)	131-18-0	Annex XIV, SVHC (TR), Annex XVII	YES	9; 21	-	NO	-	NO	YES	306.4	5.62	26	N.A.	N.A.	0.8	26	0.0261	26	1	2	3	4	Italy	WWTP receiving mixed textile-domestic wastewater	42							N.A.
Phthalic acid esters (PAEs)	Di-sec-octylphthlate (DEHP)	117-81-7	Annex XIV, SVHC (TR and ED), Annex XVII	YES	18; 19	-	NO	-	NO	YES	390.6	7.6	25	N.A.	N.A.	0.27	25	0.0013	25	1	2	3	4	Turkey; China	Textile WWTPs; River; Clothes	34; 50; 88	>0.32	97	0.14	97	37.95	97	0.14	D	0.00014
Phthalic acid esters (PAEs)	Isobutyl methyl phthalate	73513-54-9	Not available	NO	1	-	NO	-	NO	NO	236.26	2.8	(Computed by XLogP3 3.0 release 2021.10.14) 25	N.A.	N.A.	N.A.	N.A.	N.A.	N.A.	1	2	3	4	China	River	34							N.A.
Phthalic acid esters (PAEs)	Mono-2-ethylhexylphthalate (MEHP)	4376-20-9	Not available	NO	1	-	NO	-	NO	NO	278.34	4.73	26	N.A.	N.A.	1.49	26	0.000109	26	1	2	3	4	Turkey	Textile WWTPs	50							N.A.
Phthalic acid esters (PAEs)	Mono-nbutyl-phthalate (MBP) active metabolite of di-n-butyl phthalate (DBP CAS: 84-74-2) which is reported into ZDHC list and PBT and ED	131-70-4	Not available	NO	1	-	NO	-	NO	NO	222.24	2.84	26	N.A.	N.A.	126	26	0.00516	26	1	2	3	4	Turkey; Morocco; Italy; China	Textile WWTPs; WWTP receiving mixed textile-domestic wastewater; River; Clothes	34; 35; 42; 50; 88							N.A.
Phthalic acid esters (PAEs)	Phthalic acid di(2-propylpentyl)ester	70910-37-1	Not available	NO	1	-	NO	-	NO	NO	390.6	8.39	26	N.A.	N.A.	0.000239	26	0.000185	26	1	2	3	4	China	River	34							N.A.
Phthalic acid esters (PAEs)	Phthalic acid, 6-ethyloct-3-yl 2-ethylhexyl ester	959267-44-8	Not available	NO	1	-	NO	-	NO	NO	419	N.A.	N.A.	N.A.	N.A.	N.A.	N.A.	N.A.	N.A.	1	2	3	4	Morocco	Textile effluents	35							N.A.
Phthalic acid esters (PAEs)	Phthalic anhydride	85-44-9	Not available	NO	1	-	NO	-	NO	NO	148.11	1.6	26	N.A.	N.A.	3330	26	0.0296	26	1	2	3	4	Croatia	River	47							N.A.
Polybrominated Diphenyl Ethers (PBDEs)	2,2',4,4',5-pentabromodiphenyl ether (PBDE- 99)	60348-60-9	POP	YES	8	-	NO	POP	YES	YES	564.7	7.32	27	N.A.	N.A.	0.009	27	7.94e-06	27				4	Spain	Textile effluents; River	90			0.002	97			0.002	D	2e-06
Polybrominated Diphenyl Ethers (PBDEs)	2,2',4,4',6-pentabromodiphenyl ether (PBDE-100)	189084-64-8	POP	YES	8	-	NO	POP	YES	YES	564.7	7.24	27	N.A.	N.A.	0.04	27	7.07e-06	27				4	Spain	Textile effluents; River	90			0.01	97			0.01	D	1e-05
Polybrominated Diphenyl Ethers (PBDEs)	2,2',4,4'-tetrabromodiphenyl ether (PBDE-47)	5436-43-1	POP	YES	8	-	NO	POP	YES	YES	485.79	6.81	27	N.A.	N.A.	0.001	27	5.52e-05	27				4	Spain	Textile effluents; River	90			0.0078	97	5.37	97	0.007	D	7e-06
Polychloro Biphenil (PCB) dioxin-like PCB	3,3',4,4'-Tetrachlorobiphenyl (PCB-77)	32598-13-3	POP	YES	8	-	NO	-	NO	NO	292	6.72	25	N.A.	N.A.	0.18	25	0.00219	25		2	3		Spain	Clothes	91					0.6	97	0.6	F	0.0006
Polychloro Biphenil (PCB) dioxin-like PCB	2,3',4,4',5-Pentachlorobiphenyl (PCB-118)	31508-00-6	POP	YES	8	-	NO	-	NO	NO	326.4	7.12	25	N.A.	N.A.	N.A.	N.A.	0.0012	25		2	3		Spain	Clothes	91							N.A.
Polychloro Biphenil (PCB) dioxin-like PCB	3,3',4,4'-Tetrachlorobiphenyl (PCB-81)	70362-50-4	POP	YES	8	-	NO	-	NO	NO	292	6.72	25	N.A.	N.A.	N.A.	N.A.	N.A.	N.A.		2	3		Spain	Clothes	91							N.A.
Polychloro Biphenil (PCB) dioxin-like PCB	2,3',4,4',5'-Pentachlorobiphenyl (PCB-123)	65510-44-3	POP	YES	8	-	NO	-	NO	NO	326.4	6.9	25	N.A.	N.A.	N.A.	N.A.	N.A.	N.A.		2	3		Spain	Clothes	91							N.A.
Polychloro Biphenil (PCB) dioxin-like PCB	2,3,4,4',5-Pentachlorobiphenyl (PCB-114)	74472-37-0	POP	YES	8	-	NO	-	NO	NO	326.4	7	25	N.A.	N.A.	N.A.	N.A.	N.A.	N.A.		2	3		Spain	Clothes	91							N.A.
Polychloro Biphenil (PCB) dioxin-like PCB	2,3,3',4,4'-Pentachlorobiphenyl (PCB-105)	32598-14-4	POP	YES	8	-	NO	-	NO	NO	326.4	6.98	25	N.A.	N.A.	0.0034	25	0.000871	25		2	3		Spain	Clothes	91							N.A.
Polychloro Biphenil (PCB) dioxin-like PCB	3,3',4,4',5-Pentachlorobiphenyl (PCB-126)	57465-28-8	POP	YES	8	-	NO	-	NO	NO	326.4	7.3	25	N.A.	N.A.	N.A.	N.A.	N.A.	N.A.		2	3		Spain	Clothes	91					1.16	97	1.16	F	0.00116
Polychloro Biphenil (PCB) dioxin-like PCB	2,3',4,4',5,5'-Hexachlorobiphenyl (PCB-167)	52663-72-6	POP	YES	8	-	NO	-	NO	NO	360.9	6.87	26	N.A.	N.A.	N.A.	N.A.	7.73e-05	25		2	3		Spain	Clothes	91							N.A.
Polychloro Biphenil (PCB) dioxin-like PCB	2,3,3',4,4',5-Hexachlorobiphenyl (PCB-156)	38380-08-4	POP	YES	8	-	NO	-	NO	NO	360.9	7.6	25	N.A.	N.A.	N.A.	N.A.	0.000215	25		2	3		Spain	Clothes	91							N.A.
Polychloro Biphenil (PCB) dioxin-like PCB	2,3,3',4,4',5'-Hexachlorobiphenyl (PCB-157)	69782-90-7	POP	YES	8	-	NO	-	NO	NO	360.9	7.6	25	N.A.	N.A.	N.A.	N.A.	N.A.	N.A.		2	3		Spain	Clothes	91							N.A.
Polychloro Biphenil (PCB) dioxin-like PCB	3,3',4,4',5,5'-Hexachlorobiphenyl (PCB-169)	32774-16-6	POP	YES	8	-	NO	-	NO	NO	360.9	7.4	25	N.A.	N.A.	N.A.	N.A.	N.A.	N.A.		2	3		Spain	Clothes	91							N.A.
Polychloro Biphenil (PCB) dioxin-like PCB	2,3,3',4,4',5,5'-Heptachlorobiphenyl (PCB-189)	39635-31-9	POP	YES	8	-	NO	-	NO	NO	395.3	8.1	25	N.A.	N.A.	N.A.	N.A.	N.A.	N.A.		2	3		Spain	Clothes	91							N.A.
Polychloro Biphenil (PCB) non-dioxin-like PCB	2,4,4'-Trichlorobiphenyl (PCB-28)	7012-37-5	POP	YES	8	-	NO	-	NO	NO	257.5	5.6	25	N.A.	N.A.	N.A.	N.A.	N.A.	N.A.		2	3		Spain	Clothes	91			>0.16	97	>0.16	97	0.16	D-F	0.00016
Polychloro Biphenil (PCB) non-dioxin-like PCB	2,2',5,5'-Tetrachlorobiphenyl (PCB-52)	35693-99-3	POP	YES	8	-	NO	-	NO	NO	292	6.1	25	N.A.	N.A.	N.A.	N.A.	N.A.	N.A.		2	3		Spain	Clothes	91			>0.03	97	>0.03	97	0.03	D-F	3e-05
Polychloro Biphenil (PCB) non-dioxin-like PCB	2,2',4,5,5'-Pentachlorobiphenyl (PCB-101)	37680-73-2	POP	YES	8	-	NO	-	NO	NO	326.4	6.5	25	N.A.	N.A.	N.A.	N.A.	N.A.	N.A.		2	3		Spain	Clothes	91			0.21	97	>0.01	97	0.21	D	0.00021
Polychloro Biphenil (PCB) non-dioxin-like PCB	2,2',4,4',5,5'-Hexachlorobiphenyl (PCB-153)	35065-27-1	POP	YES	8	-	NO	-	NO	NO	360.9	7.2	25	N.A.	N.A.	N.A.	N.A.	N.A.	N.A.		2	3		Spain	Clothes	91			>0.0013	97	>0.001	97	0.0013	D-F	1.3e-06
Polychloro Biphenil (PCB) non-dioxin-like PCB	2,2',3,4,4',5'-Hexachlorobiphenyl (PCB-138)	35065-28-2	POP	YES	8	-	NO	-	NO	NO	360.9	7.2	25	N.A.	N.A.	N.A.	N.A.	N.A.	N.A.		2	3		Spain	Clothes	91							N.A.
Polychloro Biphenil (PCB) non-dioxin-like PCB	2,2',3,4,4',5,5'-Heptachlorobiphenyl (PCB-180)	35065-29-3	POP	YES	8	-	NO	-	NO	NO	395.3	7.9	25	N.A.	N.A.	N.A.	N.A.	N.A.	N.A.		2	3		Spain	Clothes	91							N.A.
Polycyclic Aromatic Hydrocarbons (PAHs)	2-methylnaphthalene	91-57-6	Not available	NO	1	-	NO	-	NO	NO	142.2	3.86	25	N.A.	N.A.	24.6	25	7.33	25		2	3		China	Textile-WWTPs; River	34			1.49	97	1.45	97	1.45	F	0.00145
Polycyclic Aromatic Hydrocarbons (PAHs)	Acenaphthene	83-32-9	Not available	NO	1	-	NO	-	NO	YES	154.21	3.92	25	N.A.	N.A.	3.9	25	0.293	25		2	3		Italy; China	Textile WWTPs; WWTP receiving mixed textile-domestic wastewater; Sludge	42; 92; 93			0.12	97	0.58	97	0.12	D	0.00012
Polycyclic Aromatic Hydrocarbons (PAHs)	Acenaphthylene	208-96-8	Not available	NO	1	-	NO	-	NO	YES	152.19	3.93	25	N.A.	N.A.	3.93	25	0.64	25		2	3		Italy; China	Textile WWTPs, WWTP receiving mixed textile-domestic wastewater; Sludge	42; 92; 93							N.A.
Polycyclic Aromatic Hydrocarbons (PAHs)	Anthracene	120-12-7	SVHC candidate as PBT	YES	4	-	NO	-	NO	YES	178.23	4.45	25	N.A.	N.A.	0.0434	25	0.000875	25		2	3		Italy; China	Textile WWTPs; WWTP receiving mixed textile-domestic wastewater; Sludge	42; 92; 93	0.0039	97	0.03	97	0.018	97	0.0039	A	3.9e-06
Polycyclic Aromatic Hydrocarbons (PAHs)	Benzo(a)anthracene	56-55-3	Annex XVII and SVHC candidate as PBT, vPvB and C	YES	4; 21	-	NO	-	NO	YES	228.3	5.76	25	N.A.	N.A.	0.0094	25	2.8e-05	25		2	3		Italy; China	Textile WWTPs; WWTP receiving mixed textile-domestic wastewater; Sludge	42; 92; 93			0.09	97			0.09	D	9e-05
Polycyclic Aromatic Hydrocarbons (PAHs)	Benzo(a)pyrene	50-32-8	Annex XVII and SVHC candidate as C,M,PBT,TR	YES	4; 21	-	NO	-	NO	YES	252.3	6.13	25	N.A.	N.A.	0.00162	25	7.32e-07	25		2	3		Italy; China	Textile WWTPs; WWTP receiving mixed textile-domestic wastewater; Sludge	42; 92; 93	0.05	97	0.005	97	1.03	97	0.005	D	5e-06
Polycyclic Aromatic Hydrocarbons (PAHs)	Benzo(b)fluoranthene	205-99-2	Annex XVII	YES	21	-	NO	-	NO	YES	252.3	5.78	26	N.A.	N.A.	0.0207	26	6.67e-05	26		2	3		Italy; China	Textile WWTPs; WWTP receiving mixed textile-domestic wastewater; Sludge	42; 92; 93							N.A.
Polycyclic Aromatic Hydrocarbons (PAHs)	Benzo(ghi)perylene	191-24-2	SVHC candidate as PBT and vPvB	YES	4	-	NO	-	NO	YES	276.3	6.63	25	N.A.	N.A.	0.00026	25	1.33e-08	25		2	3		Turkey; Italy; China	Textile WWTPs; WWTP receiving mixed textile-domestic wastewater; Sludge	42; 50; 92; 93							N.A.
Polycyclic Aromatic Hydrocarbons (PAHs)	Benzo(k)fluoranthene	207-08-9	Annex XVII, SVHC Candidate as PBT, vPvB and C, POP	YES	4; 8; 21	-	NO	-	NO	YES	252.3	6.11	25	N.A.	N.A.	0.0008	25	1.29e-07	25		2	3		Italy; China	Textile WWTPs; WWTP receiving mixed textile-domestic wastewater; Sludge	42; 92; 93							N.A.
Polycyclic Aromatic Hydrocarbons (PAHs)	Chrysene	218-01-9	Annex XVII and SVHC candidate as PBT, C and vPvB	YES	4; 21	-	NO	-	NO	YES	228.3	5.73	25	N.A.	N.A.	0.002	25	8.31e-07	25		2	3		Italy; China	Textile WWTPs; WWTP receiving mixed textile-domestic wastewater; Sludge	42; 92; 93							N.A.
Polycyclic Aromatic Hydrocarbons (PAHs)	Dibenzo(ah)anthracene	53-70-3	Annex XVII	YES	21	-	NO	-	NO	YES	278.3	6.5	25	N.A.	N.A.	0.000627	25	1.27e-07	25		2	3		Italy; China	Textile WWTPs; WWTP receiving mixed textile-domestic wastewater; Sludge	42; 92; 93			0.000551139	97			0.000551139	D	5.51139e-07
Polycyclic Aromatic Hydrocarbons (PAHs)	Fluoranthene	206-44-0	SVHC candidate as PBT and vPvB	YES	4	-	NO	-	NO	YES	202.25	5.16	25	N.A.	N.A.	N.A.	N.A.	0.00123			2	3		Italy	Textile WWTPs; WWTP receiving mixed textile-domestic wastewater; Sludge	42; 93			0.0016	97	0.00683	97	0.0016	D	1.6e-06
Polycyclic Aromatic Hydrocarbons (PAHs)	Fluorene	86-73-7	Not available	NO	1	-	NO	-	NO	YES	166.22	4.18	25	N.A.	N.A.	1.69	25	0.08	25		2	3		Turkey; Italy; China	Textile WWTPs; WWTP receiving mixed textile-domestic wastewater; Sludge	42; 50; 92; 93			0.6	97	0.76	97	0.6	D	0.0006
Polycyclic Aromatic Hydrocarbons (PAHs)	Indeno(1,2,3-cd)pyrene	193-39-5	POP	YES	8	-	NO	-	NO	YES	276.3	6.58	25	N.A.	N.A.	0.00069	25	3.52e-05	26		2	3		Italy; China	Textile WWTPs; WWTP receiving mixed textile-domestic wastewater; Sludge	42; 92; 93							N.A.
Polycyclic Aromatic Hydrocarbons (PAHs)	Naphthalene	91-20-3	Not available	NO	1	CoRAP Need for follow-up regulatory action at EU level and Other EU-wide measures	YES	-	NO	YES	128.17	3.3	25	N.A.	N.A.	31	25	11.3	25		2	3		China; Turkey; Italy	Textile WWTPs; WWTP receiving mixed textile-domestic wastewater; River; Sludge	34; 50; 42; 92; 93	33	97	1.96	97	0.21	97	0.21	F	0.00021
Polycyclic Aromatic Hydrocarbons (PAHs)	Phenanthrene	85-01-8	SVHC candidate as vPvB	YES	4	-	NO	-	NO	YES	178.23	4.46	25	N.A.	N.A.	1.15	25	0.0161	25		2	3		Turkey; Italy; China	Textile WWTPs; WWTP receiving mixed textile-domestic wastewater; Sludge	50; 42; 92; 93	6.30946	97	0.2	97	0.23	97	0.2	D	0.0002
Polycyclic Aromatic Hydrocarbons (PAHs)	Pyrene	129-00-0	SVHC candidate as PBT and vPvB	YES	4	-	NO	-	NO	YES	202.25	4.88	25	N.A.	N.A.	0.135	25	0.0006	25		2	3		Italy; China	Textile WWTPs; WWTP receiving mixed textile-domestic wastewater; Sludge	42; 92; 93			0.09	97	>2	97	0.09	D	9e-05
Polycyclic Aromatic Hydrocarbons (PAHs)	2-Isopropyl-10-methylphenanthrene	66552-97-4	Not available	NO	1	-	NO	-	NO	NO	234.335	6.35	26	N.A.	N.A.	0.00848	26	0.00081	26		2	3		Morocco	Textile effluents	35							N.A.
Quinolines	1‐methylisoquinoline	1721-93-3	Not available	NO	1	-	NO	-	NO	NO	143.18	2.69	26	N.A.	N.A.	2370	26	4.04	26		2	3		Bangladesh; Philippines; Georgia; Potugal; China; BulgariaLatvia; Lithuania; India; Indonesia; Turkey; Cambodia; Swtizerland; Italy; Egypt; Pakistan; Poland	Clothes; Textile WWTPs; River	34; 68							N.A.
Quinolines	2,4‐dimethylquinoline	1198-37-4	Not available	NO	1	-	NO	-	NO	NO	157.21	3.24	26	N.A.	N.A.	1800	26	1.06	26		2	3		Bangladesh; Philippines; Georgia; Potugal; China; BulgariaLatvia; Lithuania; India; Indonesia; Turkey; Cambodia; Swtizerland; Italy; Egypt; Pakistan; Poland	Clothes	68							N.A.
Quinolines	2,6‐dimethylquinoline	877-43-0	Not available	NO	1	-	NO	-	NO	NO	157.21	3.24	26	N.A.	N.A.	121	26	0.714	26		2	3		Bangladesh; Philippines; Georgia; Potugal; China; BulgariaLatvia; Lithuania; India; Indonesia; Turkey; Cambodia; Swtizerland; Italy; Egypt; Pakistan; Poland	Clothes	68	5.8	97	38	97	7.6	97	5.8	A	0.0058
Quinolines	2-Amino-3-methyl-imidazo[4,5-f]quinoline (IQ)	76180-96-6	Not available	NO	1	-	NO	-	NO	NO	198.22	1.47	25	N.A.	N.A.	196	26	7.48e-06	26		2	3		Croatia	River	47							N.A.
Quinolines	2‐methylquinoline	91-63-4	Not available	NO	1	-	NO	-	NO	NO	143.18	2.59	25	N.A.	N.A.	499	26	1.26	25		2	3		Bangladesh; Philippines; Georgia; Potugal; China; BulgariaLatvia; Lithuania; India; Indonesia; Turkey; Cambodia; Swtizerland; Italy; Egypt; Pakistan; Poland	Clothes	44; 68							N.A.
Quinolines	3‐methylquinoline	612-58-8	Not available	NO	1	-	NO	-	NO	NO	143.18	2.53	26	N.A.	N.A.	561	26	2.15	26		2	3		Bangladesh; Philippines; Georgia; Potugal; China; BulgariaLatvia; Lithuania; India; Indonesia; Turkey; Cambodia; Swtizerland; Italy; Egypt; Pakistan; Poland	Clothes	68							N.A.
Quinolines	4‐methylquinoline	491-35-0	Not available	NO	1	-	NO	-	NO	NO	143.18	2.61	25	5.67	25	783	25	0.849	26		2	3		Bangladesh; Philippines; Georgia; Potugal; China; BulgariaLatvia; Lithuania; India; Indonesia; Turkey; Cambodia; Swtizerland; Italy; Egypt; Pakistan; Poland	Clothes	68							N.A.
Quinolines	6‐methylquinoline	91-62-3	Not available	NO	1	-	NO	-	NO	NO	143.18	2.57	26	N.A.	N.A.	631	26	1.18	26		2	3		Bangladesh; Philippines; Georgia; Potugal; China; BulgariaLatvia; Lithuania; India; Indonesia; Turkey; Cambodia; Swtizerland; Italy; Egypt; Pakistan; Poland	Clothes	68							N.A.
Quinolines	7‐methylquinoline	612-60-2	Not available	NO	1	-	NO	-	NO	NO	143.18	2.57	26	N.A.	N.A.	631	26	1.18	26		2	3		Bangladesh; Philippines; Georgia; Potugal; China; BulgariaLatvia; Lithuania; India; Indonesia; Turkey; Cambodia; Swtizerland; Italy; Egypt; Pakistan; Poland	Clothes	68							N.A.
Quinolines	8‐methylquinoline	611-32-5	Not available	NO	1	-	NO	-	NO	NO	143.18	2.6	26	N.A.	N.A.	489	26	3.33	26		2	3		Bangladesh; Philippines; Georgia; Potugal; China; BulgariaLatvia; Lithuania; India; Indonesia; Turkey; Cambodia; Swtizerland; Italy; Egypt; Pakistan; Poland	Clothes	68							N.A.
Quinolines	2-Benzyl-quinoline	1745-77-3	Not available	NO	1	-	NO	-	NO	NO	219.28	4.4	26	N.A.	N.A.	6.1	26	0.00128	26		2	3		Portugal	Textile effluents	56							N.A.
Quinolines	Isoquinoline	119-65-3	Not available	NO	1	-	NO	-	NO	NO	129.16	2.08	25	5.42	25	4520	25	9.33	25		2	3		Bangladesh; Philippines; Georgia; Potugal; China; BulgariaLatvia; Lithuania; India; Indonesia; Turkey; Cambodia; Swtizerland; Italy; Egypt; Pakistan; Poland	Clothes	68			25.1	97	14	97	14	F	0.014
Quinolines	Quinoline	91-22-5	Annex XVII	YES	21	-	NO	-	NO	YES	129.16	2.03	25	4.9	25	6110	25	8	25		2	3		Bangladesh; Philippines; Georgia; Potugal; China; BulgariaLatvia; Lithuania; India; Indonesia; Turkey; Cambodia; Swtizerland; Italy; Egypt; Pakistan; Poland	Clothes; Textile WWTPs; River	34; 44; 68			34.5	97	0.44	97	0.44	F	0.00044
Quinolines	Quinoline-d7	34071-94-8	Not available	NO	1	-	NO	-	NO	NO	136.2	2	(Computed by XLogP3 3.0 release 2021.10.14) 25	N.A.	N.A.	N.A.	N.A.	N.A.	N.A.		2	3		Bangladesh; Philippines; Georgia; Potugal; China; BulgariaLatvia; Lithuania; India; Indonesia; Turkey; Cambodia; Swtizerland; Italy; Egypt; Pakistan; Poland	Clothes	68							N.A.
Quinones	2,6-Di-tert-butyl-1,4-benzoquinone	719-22-2	Not available	NO	1	-	NO	-	NO	NO	220.31	4.42	26	N.A.	N.A.	5.76	26	0.995	26				4	Portugal	Textile WWTPs	56							N.A.
Steroid-related compounds	2-Secoandrosta-1,6-diene-17,19-diol,2-cyano-4-methylene-, diacetate	N.A.	Not available	NO	1	-	NO	-	NO	NO	411.5	N.A.	N.A.	N.A.	N.A.	N.A.	N.A.	N.A.	N.A.	N.A.	N.A.	N.A.	N.A.	Morocco	Textile effluents	35							N.A.
Steroids	10a,12a-Dimethyl-hexadecahydro-2-oxa-chrysen-3-one	N.A.	Not available	NO	1	-	NO	-	NO	NO	N.A.	N.A.	N.A.	N.A.	N.A.	N.A.	N.A.	N.A.	N.A.	N.A.	N.A.	N.A.	N.A.	Morocco	Textile effluents	35							N.A.
Sulfonic acids	4-(Decan-4-yl)benzenesulfonic acid (C10 LAS)	1322-98-1	Not available	NO	1	-	NO	-	NO	NO	320.423	N.A.	N.A.	N.A.	N.A.	N.A.	N.A.	N.A.	N.A.	1	2	3	4	Portugal; Spain	Textile WWTPs	64							N.A.
Sulfonic acids	Dodecylbenzenesulfonic acid (ADBS)	27176-87-0	Not available	NO	1	-	NO	-	NO	NO	326.5	6.7	(Computed by XLogP3 3.0 release 2021.10.14) 25	N.A.	N.A.	N.A.	N.A.	N.A.	N.A.	1	2	3	4	Argentina	Textile effluents; Lagoon	37							N.A.
Sulfonic acids	5-(4-Sulfophenyl)undecane (C11-LAS)	27636-75-5	Not available	NO	1	-	NO	-	NO	NO	334.449	N.A.	N.A.	N.A.	N.A.	N.A.	N.A.	N.A.	N.A.	1	2	3	4	Portugal; Spain	Textile WWTPs	64							N.A.
Sulfonic acids	Sodium 3-nitrobenzenesulfonate	127-68-4	Not available	NO	1	-	NO	-	NO	NO	225.16	N.A.	N.A.	N.A.	N.A.	N.A.	N.A.	N.A.	N.A.	1	2	3	4	Spain; Portugal	Textile WWTPs	64; 94			8665	97			8665	D	8.665
Sulfonic acids	4- methylbenzenesulfonic acid	104-15-4	Not available	NO	1	-	NO	-	NO	NO	172.2	0.9	25	N.A.	N.A.	202000	26	0.00036	25	1	2	3	4	Spain	Textile WWTPs	94							N.A.
Sulfonic acids	Sodium 4-chlorobenzenesulfonate	5138-90-9	Not available	NO	1	-	NO	-	NO	NO	214.6	N.A.	N.A.	N.A.	N.A.	N.A.	N.A.	N.A.	N.A.				4	Spain	Textile WWTPs	94			7659	97			7659	D	7.659
Sulfonic acids	Sodium Benzenesulfonate	515-42-4	Not available	NO	1	-	NO	-	NO	NO	180.16	N.A.	N.A.	N.A.	N.A.	N.A.	N.A.	N.A.	N.A.	1	2	3	4	Spain	Textile WWTPs	94			2840	97			2840	D	2.84
Sulfonic acids	Sodium 4-tridecylbenzenesulfonate	14356-40-2	Not available	NO	1	-	NO	-	NO	NO	362.5	N.A.	N.A.	N.A.	N.A.	N.A.	N.A.	N.A.	N.A.	1	2	3	4	Portugal; Spain	Textile WWTPs	64							N.A.
Sulfonic acids	1-amino-7-naphthalenesulfonic acid	119-28-8	Not available	NO	1	-	NO	-	NO	NO	223.25	-0.91	26	N.A.	N.A.	1970	26	7.01e-08	26		2	3	4	Spain	Textile WWTPs	94							N.A.
Sulfonic acids	1-hydroxy-4-naphthalenesulfonic acid	84-87-7	Not available	NO	1	-	NO	-	NO	NO	224.237	-0.44	26	N.A.	N.A.	295000	26	1.3e-07	26		2	3	4	Spain	Textile WWTPs	94							N.A.
Sulfonic acids	Sodium 2-naphthalenesulfonate	532-02-5	Not available	NO	1	-	NO	-	NO	NO	230.22	N.A.	N.A.	N.A.	N.A.	N.A.	N.A.	N.A.	N.A.		2	3	4	Spain; Portugal	Textile WWTPs	64; 94			135	97			135	D	0.135
Sulfonic acids	Sulfonated naphthalene formaldehyde condensates (SNFC)	577773-56-9	Not available	NO	1	-	NO	-	NO	NO	238.26	N.A.	N.A.	N.A.	N.A.	N.A.	N.A.	N.A.	N.A.		2	3	4	China	Textile WWTPs; River; Sludge receiving textile wastewater	36; 95							N.A.
Sulfonic acids	Sodium xylenesulfonate	1300-72-7	Not available	NO	1	-	NO	-	NO	NO	208.21	N.A.	N.A.	N.A.	N.A.	N.A.	N.A.	N.A.	N.A.		2	3		China	Textile effluents	36							N.A.
Terpene-related compound	3-(4-methylbenzylidene)-camphor (4-MBC)	36861-47-9	SVHC candidate as ED	YES	4	-	NO	-	NO	NO	254.4	5.92	26	N.A.	N.A.	0.197	26	0.00203	26				4	Croatia	River	47							N.A.
Terpene-related compound	8a-Methyl-5-methylene-3-([(pyridin-2-ylmethyl)-amino]-methyl)-decahydro-naphtho[2,3-b]furan-2-one	1217806-85-3	Not available	NO	1	-	NO	-	NO	NO	340.459	2.52	26	N.A.	N.A.	10200	26	6e-07	26	N.A.	N.A.	N.A.	N.A.	Morocco	Textile effluents	35							N.A.
Terpene-related compound	Perillartine	30950-27-7	Not available	NO	1	-	NO	-	NO	NO	165.23	3.3	26	N.A.	N.A.	98.8	26	0.0681	26	N.A.	N.A.	N.A.	N.A.	China	Textile effluents	36							N.A.
Terpenes	(-)-Caryophyllene oxide	1139-30-6	Not available	NO	1	-	NO	-	NO	NO	220.35	4.91	26	N.A.	N.A.	2.21	26	1.33	26	N.A.	N.A.	N.A.	N.A.	China	Textile effluents	36							N.A.
Terpenes	1H-2,8a-Methanocyclopenta[a]cyclopropa[e]cyclodecen-11-one, 1a,2,5,5a,6,9,10,10a-octahydro-5,5a,6-trihydroxy- (Ingenol)	30220-46-3	Not available	NO	1	-	NO	-	NO	NO	348.4	1.39	26	N.A.	N.A.	410	26	2.33e-11	26	N.A.	N.A.	N.A.	N.A.	Morocco	Textile effluents	35							N.A.
Terpenes	5-Benzofuranacetic acid, 6-ethenyl-2,4,5,6,7,7a-hexahydro-3,6-dimethyl-alpha-methylene-2-oxo-, methyl ester (deoxysericealactone)	19892-19-4	Not available	NO	1	-	NO	-	NO	NO	276.328	3.11	26	N.A.	N.A.	36.9	26	0.000455	26	N.A.	N.A.	N.A.	N.A.	Morocco	Textile effluents	35							N.A.
Volatile Organic Compounds (VOCs)	Benzene	71-43-2	Annex XVII	YES	21	-	NO	-	NO	YES	78.11	2.13	25	N.A.	N.A.	1790	25	12600	25	1	2	3	4	China	Textile WWTPs	96	29	97	17.26	97	12.5	97	12.5	F	0.0125
Volatile Organic Compounds (VOCs)	Ethylbenzene	100-41-4	Annex XVII	YES	2	-	NO	-	NO	NO	106.167	3.15	25	N.A.	N.A.	169	25	1280	25	1	2	3	4	China	Textile WWTPs	96	4.6	97	3.18	97	4.2	97	3.18	D	0.00318
Volatile Organic Compounds (VOCs)	Isopropylbenzene	98-82-8	Not available	NO	1	-	NO	-	NO	NO	120.19	3.66	26	N.A.	N.A.	75	26	479	26	1	2	3	4	China	Textile WWTPs	96	2.6	97	20.3	97	2.7	97	2.6	A	0.0026
Volatile Organic Compounds (VOCs)	Styrene	100-42-5	Not available	NO	1	-	NO	-	NO	NO	104.15	2.95	25	N.A.	N.A.	0.31	25	853	25	1	2	3	4	China	Textile WWTPs	96			4.7	97	4	97	4	F	0.004
Volatile Organic Compounds (VOCs)	Toluene	108-88-3	Annex XVII	YES	2	-	NO	-	NO	YES	92.14	2.73	25	N.A.	N.A.	526	25	3790	25	1	2	3	4	China	Textile WWTPs	96	12.5	97	3.77	97	5.5	97	3.77	D	0.00377
Volatile Organic Compounds (VOCs)	o-Xylenes	1330-20-7	Not available	NO	1	-	NO	-	NO	YES	106.16	3.2	25	N.A.	N.A.	160	25	1110	25	1	2	3	4	China	Textile WWTPs	96			87.58	97	3.3	97	3.3	F	0.0033
Notes: SVHC: substance of very high concern; MW: molecular weight; WS: water solubility; VP: vapor pressure; Not available: no specific classification is reported on ECHA/REACH; M: mutagen; C: carcinogenic; ED: endocrine disruptor; TR: toxic for reproduction: PBT: persistent bioaccumulative toxic; vPvB: very persistent very bioaccumulative; P/T: pre-treatment processes; DP: dyeing processes; PP: …

## Sheet: References
	1	ECHA. Available at: https://echa.europa.eu/it/echa-chem
	2	Commission Regulation (EC) No 552/2009 amending Regulation (EC) No 1907/2006 of the European Parliament and of the Council on the Registration, Evaluation, Authorisation and Restriction of Chemicals (REACH) as regards Annex XVII. Available at: https://eur-lex.europa.eu/legal-content/EN/TXT/PDF/?uri=CELEX:32009R0552
	3	SVHC- Substances of Very High Concern. Available at: (https://echa.europa.eu/it/candidate-list-table?p_p_id=disslists_WAR_disslistsportlet&p_p_lifecycle=1&p_p_state=normal&p_p_mode=view&_disslists_WAR_disslistsportlet_javax.portlet.action=searchDissLists)
	4	Regulation (EC) no 1907/2006 of the European parliament and of the council concerning the Registration, Evaluation, Authorisation and Restriction of Chemicals (REACH), establishing a European Chemicals Agency, amending Directive 1999/45/EC and repealing Council Regulation (EEC) No 793/93 and Commission Regulation (EC) No 1488/94 as well as Council Directive 76/769/EEC and Commission Directives 91…
	5	Corrigendum to Regulation (EC) No 1907/2006. Available at: https://eur-lex.europa.eu/legal-content/EN/TXT/PDF/?uri=CELEX:32006R1907R(01)
	6	Annex XVII COMMISSION REGULATION (EC) No 552/2009. Available at: https://eur-lex.europa.eu/legal-content/EN/TXT/PDF/?uri=CELEX:32009R0552
	7	COMMISSION REGULATION (EU) 2016/2235. Available at: https://eur-lex.europa.eu/legal-content/EN/TXT/?uri=uriserv:OJ.L_.2016.337.01.0003.01.ENG&toc=OJ:L:2016:337:TOC
	8	POP – Persistent Organic Pollutant. Available at: https://echa.europa.eu/it/list-of-substances-subject-to-pops-regulation?p_p_id=disslists_WAR_disslistsportlet&p_p_lifecycle=1&p_p_state=normal&p_p_mode=view&_disslists_WAR_disslistsportlet_javax.portlet.action=searchDissLists
	9	COMMISSION REGULATION (EU) 2020/17. Available at: https://eur-lex.europa.eu/legal-content/EN/TXT/PDF/?uri=CELEX:32020R0171
	10	COMMISSION REGULATION (EU) No 143/2011. Available at: https://eur-lex.europa.eu/legal-content/EN/TXT/?uri=CELEX%3A32011R0143&qid=1644847488203
	11	Regulation (EU) N. 528/2012 concerning the making available on the market and use of biocidal products. Available at: https://www.echa.europa.eu/documents/10162/fbbd46b2-f92e-d84e-4540-6e6b292751dc
	12	COMMISSION REGULATION (EU) No 125/2012. Available at: https://eur-lex.europa.eu/legal-content/EN/TXT/PDF/?uri=CELEX:32012R0125
	13	COMMISSION REGULATION (EU) 2024/1328. Available at: https://eur-lex.europa.eu/legal-content/EN/TXT/HTML/?uri=OJ:L_202401328
	14	Regulation (EU) 2019/1021 of the European Parliament and of the Council of 20 June 2019 on persistent organic pollutants. Available at: https://eur-lex.europa.eu/legal-content/EN/TXT/PDF/?uri=CELEX:32019R1021
	15	COMMISSION REGULATION (EU) 2021/1297. Available at: https://eur-lex.europa.eu/legal-content/EN/TXT/PDF/?uri=CELEX:32021R1297
	16	COMMISSION DELEGATED REGULATION (EU) 2023/1608. Available at: https://eur-lex.europa.eu/legal-content/EN/TXT/PDF/?uri=CELEX:32023R1608
	17	COMMISSION REGULATION (EU) …/… of XXX amending Annex XVII to Regulation (EC) No 1907/2006 of the European Parliament and of the Council as regards undecafluorohexanoic acid (PFHxA), its salts and PFHxA-related substances. Available at: https://ec.europa.eu/transparency/comitology-register/screen/documents/090483/6/consult?lang=en#msdynttrid=d03cGMh_SgCvJGc_BvicKCkKxHRWqgAKqJXlHBccvW8
	18	COMMISSION REGULATION (EU) 2021/2045. Available at: https://eur-lex.europa.eu/legal-content/EN/TXT/PDF/?uri=CELEX:32021R2045
	19	COMMISSION REGULATION (EU) 2018/2005. Available at: https://eur-lex.europa.eu/legal-content/EN/TXT/?uri=uriserv:OJ.L_.2018.322.01.0014.01.ENG&toc=OJ:L:2018:322:TOC
	20	COMMISSION REGULATION (EU) 2015/326.AVailable at: https://eur-lex.europa.eu/legal-content/EN/TXT/?uri=OJ:L:2015:058:TOC
	21	COMMISSION REGULATION (EU) 2018/1513. Available at: https://eur-lex.europa.eu/legal-content/EN/TXT/PDF/?uri=CELEX:32018R1513
	22	CoRAP - Substance evaluation. Available at: https://echa.europa.eu/it/information-on-chemicals/evaluation/community-rolling-action-plan/corap-table?p_p_id=disslists_WAR_disslistsportlet&p_p_lifecycle=1&p_p_state=normal&p_p_mode=view&_disslists_WAR_disslistsportlet_javax.portlet.action=searchDissLists)
	23	Stockholm convention. Available at: https://chm.pops.int/TheConvention/ThePOPs/ListingofPOPs/tabid/2509/Default.aspx
	24	ZDHC MRSL (Manufacturing Restricted Substances List) Version 3.1 , July 2024. Available at: https://mrsl-30.roadmaptozero.com/viewpdf?for=Academic%20Institution
	25	Pubchem. Available at: https://pubchem.ncbi.nlm.nih.gov/ (last consulted July 31, 2024)
	26	EPISUITE. Available at: https://www.epa.gov/tsca-screening-tools/epi-suitetm-estimation-program-interface
	27	Layla Salih Al-Omran. 2018. Physiochemical Properties and Environmental Levels of Legacy and Novel Brominated Flame Retardants. ISBN 978-1-83881-139-6. (0.5772/intechopen.73636)
	28	Donald Mackay, Wan Ying Shiu, Kuo Ching Ma. 1991. Illustrated handbook of physical-chemical properties for organic chemicals. ISBN 0-87371-583-7 (Vol II).
	29	Reaxis. Available at: https://www.reaxys.com/#/search/quick/query
	30	US EPA, 2021. Available at: https://19january2021snapshot.epa.gov/sites/static/files/2017-12/documents/ffrrofactsheet_contaminants_pfos_pfoa_11-20-17_508_0.pdf
	31	Eichler, C. M. A., Little, J.C. A, 2020. Framework to model exposure to per- and polyfluoroalkyl substances in indoor environments. Environ Sci Processes Impacts 22, 500-511
	32	EPA, 2022 Available at: https://cfpub.epa.gov/ncea/iris/iris_documents/documents/toxreviews/0701tr.pdf
	33	U.S. EPA 2023 Available at: https://cfpub.epa.gov/ncea/iris/iris_documents/documents/toxreviews/0704tr.pdf
	34	Liu, M., Lv, J., Qin, C., Zhang, H., Wu, L., Guo, W., Guo, C., Xu, J., 2022. Chemical fingerprinting of organic micropollutants in different industrial treated wastewater effluents and their effluent-receiving river. Science of The Total Environment 838, 156399. https://doi.org/10.1016/j.scitotenv.2022.156399
	35	Talouizte, H., Merzouki, M., Benlemlih, M., Bendriss Amraoui, M., 2020. Chemical Characterization of Specific Micropollutants from Textile Industry Effluents in Fez City, Morocco. Journal of Chemistry 2020, 1–11. https://doi.org/10.1155/2020/3268241
	36	Fu, L., Bin, L., Luo, Z., Huang, Z., Li, P., Huang, S., Nyobe, D., Fu, F., Tang, B., 2023. Spectral change of dissolved organic matter after extracted by solid-phase extraction and its feasibility in predicting the acute toxicity of polar organic pollutants in textile wastewater. Journal of Hazardous Materials 443, 130344. https://doi.org/10.1016/j.jhazmat.2022.130344
	37	Martínez, R.A., Fechner, D.C., Delfino, M.R., Pellerano, R.G., Goicoechea, H.C., 2022. Rapid determination of three textile surfactants in environmental samples by modeling excitation-emission second-order data with multi-way calibration methods. Environ Sci Pollut Res 29, 25869–25880. https://doi.org/10.1007/s11356-021-17660-7
	38	Loos, R., Hanke, G., Umlauf, G., Eisenreich, S.J., 2007. LC–MS–MS analysis and occurrence of octyl- and nonylphenol, their ethoxylates and their carboxylates in Belgian and Italian textile industry, waste water treatment plant effluents and surface waters. Chemosphere 66, 690–699. https://doi.org/10.1016/j.chemosphere.2006.07.060
	39	Ciofi, L., Ancillotti, C., Chiuminatto, U., Fibbi, D., Pasquini, B., Bruzzoniti, M.C., Rivoira, L., Del Bubba, M., 2016. Fully automated on-line solid phase extraction coupled to liquid chromatography–tandem mass spectrometry for the simultaneous analysis of alkylphenol polyethoxylates and their carboxylic and phenolic metabolites in wastewater samples. Anal Bioanal Chem 408, 3331–3347. https://d…
	40	Preiss, A., Sänger, U., Karfich, N., Levsen, K., Mügge, C., 2000. Characterization of Dyes and Other Pollutants in the Effluent of a Textile Company by LC/NMR and LC/MS. Anal. Chem. 72, 992–998. https://doi.org/10.1021/ac9903609
	41	Bertanza, G., Papa, M., Pedrazzani, R., Repice, C., Mazzoleni, G., Steimberg, N., Feretti, D., Ceretti, E., Zerbini, I., 2013. EDCs, estrogenicity and genotoxicity reduction in a mixed (domestic + textile) secondary effluent by means of ozonation: A full-scale experience. Science of The Total Environment 458–460, 160–168. https://doi.org/10.1016/j.scitotenv.2013.03.108
	42	Berardi, C., Fibbi, D., Coppini, E., Renai, L., Caprini, C., Scordo, C.V.A., Checchini, L., Orlandini, S., Bruzzoniti, M.C., Del Bubba, M., 2019. Removal efficiency and mass balance of polycyclic aromatic hydrocarbons, phthalates, ethoxylated alkylphenols and alkylphenols in a mixed textile-domestic wastewater treatment plant. Science of The Total Environment 674, 36–48. https://doi.org/10.1016/j…
	43	Lalonde, B., Garron, C., 2021. Nonylphenol, Octylphenol, and Nonylphenol Ethoxylates Dissemination in the Canadian Freshwater Environment. Arch Environ Contam Toxicol 80, 319–330. https://doi.org/10.1007/s00244-020-00807-x
	44	Carlsson, J., Iadaresta, F., Eklund, J., Avagyan, R., Östman, C., Nilsson, U., 2022. Suspect and non-target screening of chemicals in clothing textiles by reversed-phase liquid chromatography/hybrid quadrupole-Orbitrap mass spectrometry. Anal Bioanal Chem 414, 1403–1413. https://doi.org/10.1007/s00216-021-03766-x
	45	Pothitou, P., Voutsa, D., 2008. Endocrine disrupting compounds in municipal and industrial wastewater treatment plants in Northern Greece. Chemosphere 73, 1716–1723. https://doi.org/10.1016/j.chemosphere.2008.09.037
	46	Lee, H.-B., Peart, T.E., Gris, G., Chan, J., 2002. Endocrine-Disrupting Chemicals in Industrial Wastewater Samples in Toronto, Ontario. Water Quality Research Journal 37, 459–472. https://doi.org/10.2166/wqrj.2002.030
	47	Dragun, Z., Stipaničev, D., Fiket, Ž., Lučić, M., Udiković Kolić, N., Puljko, A., Repec, S., Šoštarić Vulić, Z., Ivanković, D., Barac, F., Kiralj, Z., Kralj, T., Valić, D., 2022. Yesterday’s contamination–A problem of today? The case study of discontinued historical contamination of the Mrežnica River (Croatia). Science of The Total Environment 848, 157775. https://doi.org/10.1016/j.scitotenv.202…
	48	Ning, X.-A., Liang, J.-Y., Li, R.-J., Hong, Z., Wang, Y.-J., Chang, K.-L., Zhang, Y.-P., Yang, Z.-Y., 2015. Aromatic amine contents, component distributions and risk assessment in sludge from 10 textile-dyeing plants. Chemosphere 134, 367–373. https://doi.org/10.1016/j.chemosphere.2015.05.015
	49	Brüschweiler, B.J., Küng, S., Bürgi, D., Muralt, L., Nyfeler, E., 2014. Identification of non-regulated aromatic amines of toxicological concern which can be cleaved from azo dyes used in clothing textiles. Regulatory Toxicology and Pharmacology 69, 263–272. https://doi.org/10.1016/j.yrtph.2014.04.011
	50	Olmez-Hanci, T., Dogruel, S., Emek, A.D.A., Yılmazer, C.E., Çınar, S., Kiraz, O., Citil, E., Orhon, A.K., Siltu, E., Gucver, S.M., Ozgun, O.K., Tanik, A., Yetis, U., 2020. Performance of ozone and peroxone on the removal of endocrine disrupting chemicals (EDCs) coupled with cost analysis. Water Science and Technology 82, 640–650. https://doi.org/10.2166/wst.2020.339
	51	Xue, J., Liu, W., Kannan, K., 2017. Bisphenols, Benzophenones, and Bisphenol A Diglycidyl Ethers in Textiles and Infant Clothing. Environ. Sci. Technol. 51, 5279–5286. https://doi.org/10.1021/acs.est.7b00701
	52	Lee, S., Liao, C., Song, G.-J., Ra, K., Kannan, K., Moon, H.-B., 2015. Emission of bisphenol analogues including bisphenol A and bisphenol F from wastewater treatment plants in Korea. Chemosphere 119, 1000–1006. https://doi.org/10.1016/j.chemosphere.2014.09.011
	53	Li, A.J., Kannan, K., 2018. Elevated Concentrations of Bisphenols, Benzophenones, and Antimicrobials in Pantyhose Collected from Six Countries. Environ. Sci. Technol. 52, 10812–10819. https://doi.org/10.1021/acs.est.8b03129
	54	Wang, L., Zhang, Y., Liu, Y., Gong, X., Zhang, T., Sun, H., 2019. Widespread Occurrence of Bisphenol A in Daily Clothes and Its High Exposure Risk in Humans. Environ. Sci. Technol.
	55	Freire, C., Molina-Molina, J.-M., Iribarne-Durán, L.M., Jiménez-Díaz, I., Vela-Soria, F., Mustieles, V., Arrebola, J.P., Fernández, M.F., Artacho-Cordón, F., Olea, N., 2019. Concentrations of bisphenol A and parabens in socks for infants and young children in Spain and their hormone-like activities. Environment International 127, 592–600. https://doi.org/10.1016/j.envint.2019.04.013
	56	Castillo, M, Barceloè, D., Pereira, A.S., Neto, F.R.A., 1999. Characterization of organic pollutants in industrial ef£uents by high-temperature gas chromatography^mass spectrometry. trends in analytical chemistry 18.
	57	Chen, X., Ning, X., Lai, X., Wang, Y., Zhang, Y., He, Y., 2021. Chlorophenols in textile dyeing sludge: Pollution characteristics and environmental risk control. Journal of Hazardous Materials 416, 125721. https://doi.org/10.1016/j.jhazmat.2021.125721
	58	Martí, I., Lloret, R., Martín-Alonso, J., Ventura, F., 2005. Determination of chlorinated toluenes in raw and treated water samples from the Llobregat river by closed loop stripping analysis and gas chromatography–mass spectrometry detection. Journal of Chromatography A 1077, 68–73. https://doi.org/10.1016/j.chroma.2005.04.051
	59	Klasmeier, J., McLachlan, M.S., 1998. PCDD/Fs in textiles — Part 1: A screening method for detection of octachlorodibenzo-p-dioxin and octachlorodibenzofuran. Chemosphere 36, 1627–1635. https://doi.org/10.1016/S0045-6535(97)10093-
	60	Horstmann, M., McLachlan, M.S., 1995. Results of an initial survey of polychlorinated dibenzo-p-dioxins (PCDD) and dibenzofurans (PCDF) in textiles. Chemosphere 31, 2579–2589. https://doi.org/10.1016/0045-6535(95)00125-R
	61	Vacchi, F.I., 2017. Quantifying the contribution of dyes to the mutagenicity of waters under the influence of textile activities. Science of the Total Environment.
	62	Carneiro, P.A., Umbuzeiro, G.A., Oliveira, D.P., Zanoni, M.V.B., 2010. Assessment of water contamination caused by a mutagenic textile effluent/dyehouse effluent bearing disperse dyes. Journal of Hazardous Materials 174, 694–699. https://doi.org/10.1016/j.jhazmat.2009.09.106
	63	Zocolo, G.J., Pilon dos Santos, G., Vendemiatti, J., Vacchi, F.I., Umbuzeiro, G. de A., Zanoni, M.V.B., 2015. Using SPE-LC-ESI-MS/MS Analysis to Assess Disperse Dyes in Environmental Water Samples. J Chromatogr Sci 53, 1257–1264. https://doi.org/10.1093/chromsci/bmu221
	64	Castillo, Montserrat, Alonso, M.C., Riu, J., Barceló, D., 1999. Identification of Polar, Ionic, and Highly Water Soluble Organic Pollutants in Untreated Industrial Wastewaters. Environ. Sci. Technol. 33, 1300–1306. https://doi.org/10.1021/es981012b
	65	Avagyan, R., Luongo, G., Thorsén, G., Östman, C., 2015. Benzothiazole, benzotriazole, and their derivates in clothing textiles—a potential source of environmental pollutants and human exposure. Environ Sci Pollut Res 22, 5842–5849. https://doi.org/10.1007/s11356-014-3691-0
	66	Zhu, H., Kannan, K., 2020. Determination of melamine and its derivatives in textiles and infant clothing purchased in the United States. Science of The Total Environment 710, 136396. https://doi.org/10.1016/j.scitotenv.2019.136396
	67	Matsukami, H., Hashimoto, S., Suzuki, G., 2021. Investigation of novel brominated triazine-based flame retardant (TDBP-TAZTO) and its transformation products emitted from fire-retarded textile manufacturing facility and its downstream sewage treatment plant. Science of The Total Environment 791, 148233. https://doi.org/10.1016/j.scitotenv.2021.148233
	68	Luongo, G., Thorsén, G., Östman, C., 2014. Quinolines in clothing textiles—a source of human exposure and wastewater pollution? Anal Bioanal Chem 406, 2747–2756. https://doi.org/10.1007/s00216-014-7688-9
	69	Chen, W., Chen, Y., Huang, H., Lu, Y., Khorram, M.S., Zhao, W., Wang, D., Qi, S., Jin, B., Zhang, G., 2019. Occurrence of N-Nitrosamines in the Pearl River delta of China: Characterization and evaluation of different sources. Water Research 164, 114896. https://doi.org/10.1016/j.watres.2019.114896
	70	Oh, J.K., Kotani, K., Managaki, S., Masunaga, S., 2014. Levels and distribution of hexabromocyclododecane and its lower brominated derivative in Japanese riverine environment. Chemosphere 109, 157–163. https://doi.org/10.1016/j.chemosphere.2014.01.074
	71	Cristale, J., Oliveira Santos, I., Umbuzeiro, G.D.A., Fagnani, E., 2021. Occurrence and risk assessment of organophosphate esters in urban rivers from Piracicaba watershed (Brazil). Environ Sci Pollut Res 28, 59244–59255. https://doi.org/10.1007/s11356-020-10150-2
	72	Zhu, H., Al-Bazi, M.M., Kumosani, T.A., Kannan, K., 2020. Occurrence and Profiles of Organophosphate Esters in Infant Clothing and Raw Textiles Collected from the United States. Environ. Sci. Technol. Lett. 7, 415–420. https://doi.org/10.1021/acs.estlett.0c00221
	73	Fu, L., Bin, L., Cui, J., Nyobe, D., Li, P., Huang, S., Fu, F., Tang, B., 2020. Tracing the occurrence of organophosphate ester along the river flow path and textile wastewater treatment processes by using dissolved organic matters as an indicator. Science of The Total Environment 722, 137895. https://doi.org/10.1016/j.scitotenv.2020.137895
	74	Clara, M., Scharf, S., Weiss, S., Gans, O., Scheffknecht, C., 2008. Emissions of perfluorinated alkylated substances (PFAS) from point sources—identification of relevant branches. Water Science and Technology 58, 59–66. https://doi.org/10.2166/wst.2008.641
	75	Alder, A.C., van der Voet, J., 2015. Occurrence and point source characterization of perfluoroalkyl acids in sewage sludge. Chemosphere 129, 62–73. https://doi.org/10.1016/j.chemosphere.2014.07.045
	76	Heydebreck, F., Tang, J., Xie, Z., Ebinghaus, R., 2016. Emissions of Per- and Polyfluoroalkyl Substances in a Textile Manufacturing Plant in China and Their Relevance for Workers’ Exposure. Environ. Sci. Technol. 50, 10386–10396. https://doi.org/10.1021/acs.est.6b03213
	77	Kim, H.-Y., Seok, H.-W., Kwon, H.-O., Choi, S.-D., Seok, K.-S., Oh, J.E., 2016. A national discharge load of perfluoroalkyl acids derived from industrial wastewater treatment plants in Korea. Science of The Total Environment 563–564, 530–537. https://doi.org/10.1016/j.scitotenv.2016.04.077
	78	Lam, N.H., Min, B.-K., Cho, C.-R., Park, K.-H., Ryu, J.-S., Kim, P.-J., Choi, K.-H., Morita, M., Cho, H.-S., 2016. Distribution of perfluoroalkyl substances in water from industrialized bays, rivers and agricultural areas in Korea. Toxicol. Environ. Health Sci. 8, 43–55. https://doi.org/10.1007/s13530-016-0260-6
	79	Ulrich, H., Freier, K.P., Gierig, M., 2016. Getting on with persistent pollutants: Decreasing trends of perfluoroalkyl acids (PFAAs) in sewage sludge. Chemosphere 161, 527–535.
	80	Lu, G.-H., Gai, N., Zhang, P., Piao, H.-T., Chen, S., Wang, X.-C., Jiao, X.-C., Yin, X.-C., Tan, K.-Y., Yang, Y.-L., 2017. Perfluoroalkyl acids in surface waters and tapwater in the Qiantang River watershed—Influences from paper, textile, and leather industries. Chemosphere 185, 610–617.
	81	Stróżyńska, M., Schuhen, K., 2020. Derivatization of Perfluorocarboxylic Acids with N,N-Dimethylformamide Dimethylacetal Prior to GC–MS Analysis. Chromatographia 83, 477–482. https://doi.org/10.1007/s10337-019-03850-6
	82	Jin, Q., Liu, S., Huang, X., Ren, R., Zhu, G., 2021. Determination of Ionic and Nonionic Perfluoroalkyl Substances (PFASs) in the Surface Water of the Qiantang River, China by Solid-Phase Extraction (SPE) and Ultra-High Performance Liquid Chromatography-Tandem Mass Spectrometry (UHPLC-MS/MS). Analytical Letters 54, 802–816. https://doi.org/10.1080/00032719.2020.1783280
	83	Yu, L., Liu, X., Hua, Z., 2022. Occurrence, distribution, and risk assessment of perfluoroalkyl acids in drinking water sources from the lower Yangtze River. Chemosphere 287, 132064. https://doi.org/10.1016/j.chemosphere.2021.132064
	84	Gu, C., Xu, C., Zhou, Q., Shen, C., Ma, C., Liu, S., Yin, S., Li, F., 2021. Congener- and isomer-specific Perfluorinated compounds in textile wastewater from Southeast China. Journal of Cleaner Production 320, 128897. https://doi.org/10.1016/j.jclepro.2021.128897
	85	Li, T., Chen, Y., Wang, Y., Tan, Y., Jiang, C., Yang, Y., Zhang, Z., 2024. Occurrence, source apportionment and risk assessment of perfluorinated compounds in sediments from the longest river in Asia. Journal of Hazardous Materials 467, 133608. https://doi.org/10.1016/j.jhazmat.2024.133608
	86	Wang, S., Zhang, B., Shan, C., Yan, X., Chen, H., Pan, B., 2020. Occurrence and transformation of phosphonates in textile dyeing wastewater along full-scale combined treatment processes. Water Research 184, 116173. https://doi.org/10.1016/j.watres.2020.116173
	87	Nowack, B., 1998. The behavior of phosphonates in wastewater treatment plants of Switzerland. Water Research 32, 1271–1279. https://doi.org/10.1016/S0043-1354(97)00338-2
	88	Li, H.-L., Ma, W.-L., Liu, L.-Y., Zhang, Z., Sverko, E., Zhang, Z.-F., Song, W.-W., Sun, Y., Li, Y.-F., 2019. Phthalates in infant cotton clothing: Occurrence and implications for human exposure. Science of the Total Environment.
	89	Liang, J., Ning, X., Kong, M., Liu, D., Wang, G., Cai, H., Sun, J., Zhang, Y., Lu, X., Yuan, Y., 2017. Elimination and ecotoxicity evaluation of phthalic acid esters from textile-dyeing wastewater. Environmental Pollution 231, 115–122. https://doi.org/10.1016/j.envpol.2017.08.006
	90	Valls-Cantenys, C., Villaverde-de-Sáa, E., Rodil, R., Quintana, J.B., Iglesias, M., Salvadó, V., Cela, R., 2013. Application of polydimethylsiloxane rod extraction to the determination of sixteen halogenated flame retardants in water samples. Analytica Chimica Acta 770, 85–93. https://doi.org/10.1016/j.aca.2013.01.05
	91	Herrero, M., González, N., Rovira, J., Marquès, M., Domingo, J.L., Abalos, M., Abad, E., Nadal, M., 2022. Health risk assessment of polychlorinated biphenyls (PCBs) in baby clothes. A preliminary study. Environmental Pollution 307, 119506. https://doi.org/10.1016/j.envpol.2022.119506
	92	Sun, S.-J., Zhao, Z.-B., Li, B., Ma, L.-X., Fu, D.-L., Sun, X.-Z., Thapa, S., Shen, J.-M., Qi, H., Wu, Y.-N., 2019. Occurrence, composition profiles and risk assessment of polycyclic aromatic hydrocarbons in municipal sewage sludge in China. Environmental Pollution 245, 764–770. https://doi.org/10.1016/j.envpol.2018.11.067
	93	Ning, X.-A., Lin, M.-Q., Shen, L.-Z., Zhang, J.-H., Wang, J.-Y., Wang, Y.-J., Yang, Z.-Y., Liu, J.-Y., 2014. Levels, composition profiles and risk assessment of polycyclic aromatic hydrocarbons (PAHs) in sludge from ten textile dyeing plants. Environmental Research 132, 112–118. https://doi.org/10.1016/j.envres.2014.03.041
	94	Alonso, M.C., Castillo, M., Barceló, D., 1999. Solid-Phase Extraction Procedure of Polar Benzene- and Naphthalenesulfonates in Industrial Effluents Followed by Unequivocal Determination with Ion-Pair Chromatography/Electrospray-Mass Spectrometry. Anal. Chem. 71, 2586–2593. https://doi.org/10.1021/ac981377e
	95	Lange, F.T., Merklinger, M., Wenz, M., Brauch, H.-J., Lehmann, M., Pinter, I., 2005. Occurrence and Solid−Liquid Partition of Sulfonated Naphthalene−Formaldehyde Condensates in the Aquatic Environment. Environ. Sci. Technol. 39, 1523–1531. https://doi.org/10.1021/es040081p
	96	Ning, X.-A., Wang, J.-Y., Li, R.-J., Wen, W.-B., Chen, C.-M., Wang, Y.-J., Yang, Z.-Y., Liu, J.-Y., 2015b. Fate of volatile aromatic hydrocarbons in the wastewater from six textile dyeing wastewater treatment plants. Chemosphere 136, 50–55. https://doi.org/10.1016/j.chemosphere.2015.03.086
	97	ECOTOX Knowledge database. U.S. Environmental Protection Agency. Available at https://cfpub.epa.gov/ecotox/search.cfm
	98	Ministry of the environment Japan. Available at: https://www.env.go.jp/content/900450339.pdf
	99	ECHA, 2001. Available at: https://www.echa.europa.eu/documents/10162/ba567fa3-282c-4b37-bcba-f82fd9ae52bc
	100	Chemical Evaluation and Research Institute, Japan. Available at: https://www.cerij.or.jp/ceri_en/hazard_assessment_report/pdf/en_101_14_4.pdf
	101	Cristale, J., Santos, I.O., Umbuzeiro, G.D.A., Fagnani, E., 2021. Occurrence and risk assessment of organophosphate esters in urban rivers from Piracicaba watershed (Brazil). Environ Sci Pollut Res 28, 59244–59255 https://doi.org/10.1007/s11356-020-10150-2
